# Supplementary material
Source: publisher site journal article supplement (https://www.dovepress.com/article/279553)
Supplement: Supplementary file 1 [file get_supplementary_file.php]

# Supplementary materials

**Supplementary Table S1: MGNC compound library**

| Ingredient Name | Mol ID    | Molecule Name                                                                                                                                  | MW    | AlogP | OB (%) | Caco-2 | BBB  | DL  | FASA- | HL   |
|-----------------|-----------|------------------------------------------------------------------------------------------------------------------------------------------------|-------|-------|--------|--------|------|-----|-------|------|
| shengdi         | MOL012254 | campesterol                                                                                                                                    | 400.8 | 7.63  | 37.58  | 1.34   | 0.98 | 0.7 | 0.21  | 20.2 |
| shengdi         | MOL000519 | coniferin                                                                                                                                      | 314.4 | 3.16  | 31.11  | 0.42   | -0.2 | 0.3 | 0.27  | 74.6 |
| shengdi         | MOL000359 | beta-sitosterol                                                                                                                                | 414.8 | 8.08  | 36.91  | 1.32   | 0.99 | 0.8 | 0.23  | 20.2 |
| shengdi         | MOL000289 | poricoic acid                                                                                                                                  | 528.9 | 6.54  | 33.63  | 0.1    | -0.6 | 0.8 | 0     | 9.27 |
| shengdi         | MOL000291 | Poricoic acid B                                                                                                                                | 484.7 | 5.64  | 30.52  | -0.08  | -0.9 | 0.8 | 0     | 8.67 |
| shengdi         | MOL004492 | Chrysanthem axanthin 20-                                                                                                                       | 585   | 8.24  | 38.72  | 0.51   | -1   | 0.6 | 0.3   | 17.5 |
| shengdi         | MOL011455 | Hexadecano ylingenol                                                                                                                           | 418.6 | 1.91  | 32.7   | -0.24  | -0.4 | 0.7 | 0.29  | 104  |
| huanglian       | MOL001454 | berberine                                                                                                                                      | 336.4 | 3.45  | 36.86  | 1.24   | 0.57 | 0.8 | 0.19  | 6.57 |
| huanglian       | MOL013352 | Obacunone                                                                                                                                      | 454.6 | 2.68  | 43.29  | 0.01   | -0.4 | 0.8 | 0.31  | -13  |
| huanglian       | MOL002894 | berberrubine                                                                                                                                   | 322.4 | 3.2   | 35.74  | 1.07   | 0.17 | 0.7 | 0.24  | 6.46 |
| huanglian       | MOL002897 | epiberberine                                                                                                                                   | 336.4 | 3.45  | 43.09  | 1.17   | 0.4  | 0.8 | 0.19  | 6.1  |
| huanglian       | MOL002903 | (R)-Canadine                                                                                                                                   | 339.4 | 3.4   | 55.37  | 1.04   | 0.57 | 0.8 | 0.2   | 6.41 |
| huanglian       | MOL002904 | Berlambine                                                                                                                                     | 351.4 | 2.49  | 36.68  | 0.97   | 0.17 | 0.8 | 0.28  | 7.33 |
| huanglian       | MOL002907 | Corchorosid e A <sub>qt</sub>                                                                                                                  | 404.6 | 1.34  | 105    | -0.91  | -1.3 | 0.8 | 0.29  | 6.68 |
| huanglian       | MOL000622 | Magnogrand iolide                                                                                                                              | 266.4 | 1.18  | 63.71  | 0.02   | -0.2 | 0.2 | 0.3   | 3.17 |
| huanglian       | MOL000762 | Palmidin A                                                                                                                                     | 510.5 | 4.52  | 35.36  | -0.38  | -1.5 | 0.7 | 0.39  | 33.2 |
| huanglian       | MOL000785 | palmatine                                                                                                                                      | 352.4 | 3.65  | 64.6   | 1.33   | 0.37 | 0.7 | 0.13  | 2.25 |
| huanglian       | MOL000098 | quercetin                                                                                                                                      | 302.3 | 1.5   | 46.43  | 0.05   | -0.8 | 0.3 | 0.38  | 14.4 |
| huanglian       | MOL001458 | coptisine                                                                                                                                      | 320.3 | 3.25  | 30.67  | 1.21   | 0.32 | 0.9 | 0.26  | 9.33 |
| huanglian       | MOL002668 | Worenine                                                                                                                                       | 334.4 | 3.73  | 45.83  | 1.22   | 0.24 | 0.9 | 0.27  | 8.41 |
| huanglian       | MOL008647 | 11alpha,12alp ha-epoxy-3beta-23-dihydroxy-30-norolean-20-en-28,12beta-olide                                                                    | 313.4 | 2.86  | 86.71  | 0.55   | -0.5 | 0.3 | 0.33  | 3.71 |
| baishao         | MOL001910 | paeoniflorge none (3S,5R,8R,9R,10S,14S)-3,17-dihydroxy-4,4,8,10,14-pentamethyl-2,3,5,6,7,9-hexahydro-1H-cyclopenta[a]p henanthrene-15,16-dione | 470.7 | 3.91  | 64.77  | 0.09   | -0.6 | 0.4 | 0.27  | 2.62 |
| baishao         | MOL001918 | paeoniflorin                                                                                                                                   | 318.4 | 0.79  | 87.59  | -0.09  | -0.6 | 0.4 | 0.37  | 7.45 |
| baishao         | MOL001919 | paeoniflorin                                                                                                                                   | 358.5 | 2.69  | 43.56  | 0      | -0.4 | 0.5 | 0.35  | 4.34 |
| baishao         | MOL001921 | Lactiflorin                                                                                                                                    | 462.5 | -0.57 | 49.12  | -1.13  | -1.8 | 0.8 | 0.34  | 7.26 |
| baishao         | MOL001924 | paeoniflorin                                                                                                                                   | 480.5 | -1.28 | 53.87  | -1.47  | -1.9 | 0.8 | 0.34  | 13.9 |

|          |           |                                                                                                                      |       |      |       |       |      |     |      |      |
|----------|-----------|----------------------------------------------------------------------------------------------------------------------|-------|------|-------|-------|------|-----|------|------|
| baishao  | MOL001925 | paeoniflorin_qt                                                                                                      | 318.4 | 0.46 | 68.18 | -0.34 | -0.7 | 0.4 | 0.39 | 8.81 |
| baishao  | MOL001928 | albiflorin_qt                                                                                                        | 318.4 | 0.42 | 66.64 | -0.49 | -0.9 | 0.3 | 0.41 | 6.54 |
| baishao  | MOL001930 | benzoyl paeoniflorin                                                                                                 | 584.6 | 0.81 | 31.27 | -0.69 | -1.2 | 0.8 | 0.29 | -1.9 |
| baishao  | MOL000211 | Mairin                                                                                                               | 456.8 | 6.52 | 55.38 | 0.73  | 0.22 | 0.8 | 0.26 | 8.87 |
| baishao  | MOL000358 | beta-sitosterol                                                                                                      | 414.8 | 8.08 | 36.91 | 1.32  | 0.99 | 0.8 | 0.23 | 5.36 |
| baishao  | MOL000359 | sitosterol                                                                                                           | 414.8 | 8.08 | 36.91 | 1.32  | 0.87 | 0.8 | 0.22 | 5.37 |
| baishao  | MOL000422 | kaempferol                                                                                                           | 286.3 | 1.77 | 41.88 | 0.26  | -0.6 | 0.2 | 0    | 14.7 |
| baishao  | MOL000492 | (+)-catechin                                                                                                         | 290.3 | 1.92 | 54.83 | -0.03 | -0.7 | 0.2 | 0    | 0.61 |
| zhimu    | MOL001677 | aspergillucic acid                                                                                                   | 444.6 | 4.02 | 58.02 | 0.28  | -0.2 | 0.5 | 0.42 | 6.88 |
| zhimu    | MOL001944 | Marmesin                                                                                                             | 246.3 | 2.03 | 50.28 | 0.52  | 0.07 | 0.2 | 0.3  | -0.1 |
| zhimu    | MOL003773 | Mangiferolic acid                                                                                                    | 442.8 | 6.47 | 36.16 | 0.66  | -0.1 | 0.8 | 0.25 | 5.71 |
| zhimu    | MOL000422 | kaempferol                                                                                                           | 286.3 | 1.77 | 41.88 | 0.26  | -0.6 | 0.2 | 0    | 14.7 |
| zhimu    | MOL004373 | Anhydroicari tin                                                                                                     | 368.4 | 3.88 | 45.41 | 0.72  | 0.01 | 0.4 | 0    | 15   |
| zhimu    | MOL004489 | Anemarsapo nin F_qt                                                                                                  | 432.7 | 3.92 | 60.06 | 0.43  | -0.3 | 0.8 | 0.18 | 4.61 |
| zhimu    | MOL004492 | Chrysanthem axanthin                                                                                                 | 585   | 8.24 | 38.72 | 0.51  | -1   | 0.6 | 0.3  | 17.5 |
| zhimu    | MOL004497 | Hippeastrine                                                                                                         | 315.4 | 1.17 | 51.65 | 0.02  | -0.5 | 0.6 | 0.32 | 8.09 |
| zhimu    | MOL004514 | Timosaponin B III_qt                                                                                                 | 416.7 | 4.77 | 35.26 | 0.42  | -0.5 | 0.9 | 0.2  | 4.32 |
| zhimu    | MOL000449 | Stigmasterol                                                                                                         | 412.8 | 7.64 | 43.83 | 1.44  | 1    | 0.8 | 0.22 | 5.57 |
| zhimu    | MOL004528 | Icariin I                                                                                                            | 676.7 | 0.77 | 41.58 | -2.06 | -3.1 | 0.6 | 0.25 | 18   |
| zhimu    | MOL004540 | Anemarsapo nin C_qt                                                                                                  | 416.7 | 4.97 | 35.5  | 0.43  | -0.5 | 0.9 | 0.2  | 3.98 |
| zhimu    | MOL004542 | Anemarsapo nin E_qt                                                                                                  | 448.8 | 4.53 | 30.67 | 0.34  | -0.2 | 0.9 | 0.17 | 5.14 |
| zhimu    | MOL000483 | (Z)-3-(4-hydroxy-3-methoxy-phenyl)-N-[2-(4-hydroxyphenyl)ethyl]acrylamide                                            | 313.4 | 2.86 | 118.4 | 0.51  | -0.3 | 0.3 | 0    | 4.26 |
| zhimu    | MOL000546 | diosgenin                                                                                                            | 414.7 | 4.63 | 80.88 | 0.82  | 0.27 | 0.8 | 0.19 | 4.14 |
| zhimu    | MOL000631 | coumaroyltyr amine                                                                                                   | 283.4 | 2.88 | 112.9 | 0.6   | -0.2 | 0.2 | 0.41 | 5.63 |
| congrong | MOL000358 | beta-sitosterol                                                                                                      | 414.8 | 8.08 | 36.91 | 1.32  | 0.99 | 0.8 | 0.23 | 5.36 |
| congrong | MOL005320 | arachidonate                                                                                                         | 304.5 | 6.41 | 45.57 | 1.27  | 0.58 | 0.2 | 0.26 | 7.56 |
| congrong | MOL005384 | suchilactone                                                                                                         | 368.4 | 3.73 | 57.52 | 0.82  | 0.28 | 0.6 | 0.28 | 9.03 |
| congrong | MOL007563 | Yangambin                                                                                                            | 446.5 | 2.6  | 57.53 | 0.67  | 0.01 | 0.8 | 0.14 | 3.61 |
| congrong | MOL000098 | quercetin                                                                                                            | 302.3 | 1.5  | 46.43 | 0.05  | -0.8 | 0.3 | 0.38 | 14.4 |
| congrong | MOL008864 | [(7S,8R)-7-hydroxy-5,6,7,8-tetrahydro-3H-pyrrolizin-1-yl]methyl (2R)-2-hydroxy-2-(1-hydroxyethyl)-3-methylbutano ate | 299.4 | 0.2  | 35.35 | -0.27 | -0.5 | 0.2 | 0.24 | 0.55 |

|          |           |                                                              |       |       |       |       |      |     |      |      |
|----------|-----------|--------------------------------------------------------------|-------|-------|-------|-------|------|-----|------|------|
| congrong | MOL008871 | Marckine                                                     | 475.7 | 5.3   | 37.05 | 0.86  | -0.1 | 0.7 | 0.17 | 13.6 |
| bajitian | MOL001506 | Supraene                                                     | 410.8 | 11.33 | 33.55 | 2.08  | 1.73 | 0.4 | 0.27 | 2.72 |
| bajitian | MOL002879 | Diop                                                         | 390.6 | 7.44  | 43.59 | 0.79  | 0.26 | 0.4 | 0.28 | 3.6  |
| bajitian | MOL002883 | Ethyl oleate (NF)                                            | 310.6 | 7.44  | 32.4  | 1.4   | 1.1  | 0.2 | 0.19 | 4.85 |
| bajitian | MOL000358 | beta-sitosterol                                              | 414.8 | 8.08  | 36.91 | 1.32  | 0.99 | 0.8 | 0.23 | 5.36 |
| bajitian | MOL000359 | sitosterol                                                   | 414.8 | 8.08  | 36.91 | 1.32  | 0.87 | 0.8 | 0.22 | 5.37 |
| bajitian | MOL006147 | Alizarin-2-methylether                                       | 254.3 | 2.53  | 32.81 | 0.62  | -0.1 | 0.2 | 0    | 30.8 |
| bajitian | MOL009495 | 2-hydroxy-1,5-dimethoxy-6-(methoxymethyl)-9,10-anthraquinone | 328.3 | 2.31  | 95.85 | 0.54  | -0.2 | 0.4 | 0.24 | 30   |
| bajitian | MOL009496 | 1,5,7-trihydroxy-6-methoxy-2-methoxymethylanthracenequinone  | 330.3 | 1.79  | 80.42 | 0.27  | -0.6 | 0.4 | 0.24 | 28.3 |
| bajitian | MOL009500 | 1,6-dihydroxy-5-methoxy-2-(methoxymethyl)-9,10-anthraquinone | 314.3 | 2.06  | 104.5 | 0.37  | -0.3 | 0.3 | 0.28 | 29   |
| bajitian | MOL009503 | 1-hydroxy-3-methoxy-9,10-anthraquinone                       | 254.3 | 2.53  | 104.3 | 0.59  | -0.2 | 0.2 | 0.39 | 30.8 |
| bajitian | MOL009504 | 1-hydroxy-6-hydroxymethylanthracenequinone                   | 254.3 | 1.94  | 81.77 | -0.04 | -0.8 | 0.2 | 0.42 | 30.8 |
| bajitian | MOL009513 | 2-hydroxy-1,8-dimethoxy-7-methoxymethylanthracenequinone     | 328.3 | 2.31  | 112.3 | 0.46  | -0.3 | 0.4 | 0.25 | 29.4 |
| bajitian | MOL009519 | (2R,3S)-(+)-3',5-Dihydroxy-4,7-dimethoxydihydroflavonol      | 332.3 | 1.99  | 77.24 | 0.13  | -0.4 | 0.3 | 0.29 | 14.1 |
| bajitian | MOL009524 | 3beta,20(R),5-alkenyl-stigmastol                             | 414.8 | 8.08  | 36.91 | 1.36  | 0.89 | 0.8 | 0.22 | 5.22 |
| bajitian | MOL009525 | 3beta-24S(R)-butyl-5-alkenyl-cholestol                       | 456.9 | 9.25  | 35.35 | 1.36  | 0.79 | 0.8 | 0.23 | 7.04 |
| bajitian | MOL009537 | americanin A                                                 | 328.3 | 2.3   | 46.71 | -0.08 | -1   | 0.4 | 0.41 | 2.6  |
| bajitian | MOL009541 | Asperuloside tetraacetate                                    | 582.6 | -1.03 | 45.47 | -1.39 | -1.7 | 0.8 | 0.34 | 20.7 |
| bajitian | MOL009551 | isoprincepin                                                 | 494.5 | 2.52  | 49.12 | -0.18 | -1.5 | 0.8 | 0.32 | 3    |

|          |           |                                                                                                                                                                          |       |      |       |       |      |     |      |      |
|----------|-----------|--------------------------------------------------------------------------------------------------------------------------------------------------------------------------|-------|------|-------|-------|------|-----|------|------|
| bajitian | MOL009558 | 2-hydroxyethyl 5-hydroxy-2-(2-hydroxybenzoyl)-4-(hydroxymethyl)benzoate                                                                                                  | 332.3 | 1.41 | 62.32 | -1.02 | -1.7 | 0.3 | 0.37 | 17.6 |
| bajitian | MOL009562 | Ohioensin-A                                                                                                                                                              | 372.4 | 3.57 | 38.13 | 0.6   | -0.2 | 0.8 | 0.41 | 15.1 |
| fuling   | MOL000273 | (2R)-2-[(3S,5R,10S,13R,14R,16R,17R)-3,16-dihydroxy-4,4,10,13,14-pentamethyl-2,3,5,6,12,15,16,17-octahydro-1H-cyclopenta[a]phenanthren-17-yl]-6-methylhept-5-enoic acid   | 470.8 | 5.41 | 30.93 | 0.01  | -0.8 | 0.8 | 0    | 6.81 |
| fuling   | MOL000275 | trametenolic acid                                                                                                                                                        | 456.8 | 7.03 | 38.71 | 0.52  | -0.1 | 0.8 | 0    | 7.78 |
| fuling   | MOL000276 | 7,9(11)-dehydropachymic acid                                                                                                                                             | 526.8 | 6.1  | 35.11 | 0.03  | -0.9 | 0.8 | 0    | 7.34 |
| fuling   | MOL000279 | Cerevisterol                                                                                                                                                             | 430.7 | 5.15 | 37.96 | 0.28  | -0.4 | 0.8 | 0    | 5.31 |
| fuling   | MOL000280 | (2R)-2-[(3S,5R,10S,13R,14R,16R,17R)-3,16-dihydroxy-4,4,10,13,14-pentamethyl-2,3,5,6,12,15,16,17-octahydro-1H-cyclopenta[a]phenanthren-17-yl]-5-isopropylhex-5-enoic acid | 484.8 | 5.72 | 31.07 | 0.05  | -0.7 | 0.8 | 0    | 7.42 |
| fuling   | MOL000282 | ergosta-7,22E-dien-3beta-ol                                                                                                                                              | 398.7 | 7.18 | 43.51 | 1.32  | 0.91 | 0.7 | 0    | 5.11 |
| fuling   | MOL000283 | Ergosterol peroxide                                                                                                                                                      | 430.7 | 7.17 | 40.36 | 0.84  | 0.34 | 0.8 | 0    | 3.43 |

|           |           |                                                                                                                                                                                                                                                                                                           |      |       |       |      |     |      |      |  |
|-----------|-----------|-----------------------------------------------------------------------------------------------------------------------------------------------------------------------------------------------------------------------------------------------------------------------------------------------------------|------|-------|-------|------|-----|------|------|--|
|           |           | (2R)-2-<br>[(5R,10S,13R,<br>14R,16R,17R)<br>-16-<br>hydroxy-3-<br>keto-<br>4,4,10,13,14-<br>pentamethyl-<br>1,2,5,6,12,15,<br>16,17-<br>octahydrocy-<br>clopenta[a]p-<br>henanthren-<br>17-yl]-5-<br>isopropyl-<br>3beta-<br>Hydroxy-24-<br>methylene-<br>8-lanostene-<br>21-oic acid<br>pachymic<br>acid |      |       |       |      |     |      |      |  |
| fuling    | MOL000285 | 482.8                                                                                                                                                                                                                                                                                                     | 5.68 | 38.26 | 0.12  | -0.6 | 0.8 | 0    | 6.77 |  |
| fuling    | MOL000287 | 470.8                                                                                                                                                                                                                                                                                                     | 7.33 | 38.7  | 0.61  | -0   | 0.8 | 0    | 6.59 |  |
| fuling    | MOL000289 | 528.9                                                                                                                                                                                                                                                                                                     | 6.54 | 33.63 | 0.1   | -0.6 | 0.8 | 0    | 9.27 |  |
| fuling    | MOL000290 | 498.8                                                                                                                                                                                                                                                                                                     | 5.94 | 30.61 | -0.14 | -0.9 | 0.8 | 0    | 8.26 |  |
| fuling    | MOL000291 | 484.7                                                                                                                                                                                                                                                                                                     | 5.64 | 30.52 | -0.08 | -0.9 | 0.8 | 0    | 8.67 |  |
| fuling    | MOL000292 | 482.8                                                                                                                                                                                                                                                                                                     | 7.11 | 38.15 | 0.32  | -0.4 | 0.8 | 0    | 7.73 |  |
| fuling    | MOL000296 | 414.8                                                                                                                                                                                                                                                                                                     | 8.08 | 36.91 | 1.32  | 0.96 | 0.8 | 0    | 5.35 |  |
| fuling    | MOL000300 | 453.8                                                                                                                                                                                                                                                                                                     | 6.35 | 44.17 | 0.38  | -0.2 | 0.8 | 0.04 | 7.04 |  |
| yinyanghu | MOL001510 | 400.8                                                                                                                                                                                                                                                                                                     | 7.63 | 37.58 | 1.43  | 1.15 | 0.7 | 0.21 | 4.5  |  |
| yinyanghu | MOL001645 | 308.6                                                                                                                                                                                                                                                                                                     | 6.85 | 42.1  | 1.36  | 1.08 | 0.2 | 0.21 | 7.48 |  |
| yinyanghu | MOL001771 | 414.8                                                                                                                                                                                                                                                                                                     | 8.08 | 36.91 | 1.45  | 1.14 | 0.8 | 0    | 5.07 |  |
| yinyanghu | MOL001792 | 256.3                                                                                                                                                                                                                                                                                                     | 2.57 | 32.76 | 0.51  | -0.3 | 0.2 | 0.42 | 17.9 |  |
| yinyanghu | MOL003044 | 300.3                                                                                                                                                                                                                                                                                                     | 2.32 | 35.85 | 0.39  | -0.5 | 0.3 | 0.32 | 16.3 |  |
| yinyanghu | MOL003542 | 354.4                                                                                                                                                                                                                                                                                                     | 3.63 | 38.04 | 0.53  | -0.5 | 0.4 | 0    | 15.4 |  |
| yinyanghu | MOL000359 | 414.8                                                                                                                                                                                                                                                                                                     | 8.08 | 36.91 | 1.32  | 0.87 | 0.8 | 0.22 | 5.37 |  |
| yinyanghu | MOL000422 | 286.3                                                                                                                                                                                                                                                                                                     | 1.77 | 41.88 | 0.26  | -0.6 | 0.2 | 0    | 14.7 |  |
| yinyanghu | MOL004367 | 376.4                                                                                                                                                                                                                                                                                                     | 1.68 | 62.23 | -0.16 | -0.8 | 0.4 | 0    | 2.27 |  |
| yinyanghu | MOL004373 | 368.4                                                                                                                                                                                                                                                                                                     | 3.88 | 45.41 | 0.72  | 0.01 | 0.4 | 0    | 15   |  |
| yinyanghu | MOL004380 | 329.5                                                                                                                                                                                                                                                                                                     | 2.89 | 39.14 | 1.02  | 0.68 | 0.5 | 0    | 6.58 |  |
| yinyanghu | MOL004382 | 420.5                                                                                                                                                                                                                                                                                                     | 4.2  | 56.96 | 0.38  | -0.5 | 0.8 | 0    | 14.4 |  |
| yinyanghu | MOL004384 | 336.4                                                                                                                                                                                                                                                                                                     | 3.39 | 45.67 | 0.75  | -0.1 | 0.5 | 0    | 15.7 |  |
| yinyanghu | MOL004386 | 352.4                                                                                                                                                                                                                                                                                                     | 3.12 | 51.63 | 0.51  | -0.5 | 0.6 | 0    | 15.5 |  |

|           |           |                                                                                                                                                           |       |      |       |       |      |     |      |      |
|-----------|-----------|-----------------------------------------------------------------------------------------------------------------------------------------------------------|-------|------|-------|-------|------|-----|------|------|
| yinyanghu | MOL004388 | 6-hydroxy-11,12-dimethoxy-2,2-dimethyl-1,8-dioxo-2,3,4,8-tetrahydro-1H-isochromeno[3,4-b]isquinolin-8-(3-methylbut-2-enyl)-2-phenyl-chromone Anhydroicari | 370.4 | 2.75 | 60.64 | 0.34  | -0.1 | 0.7 | 0    | 1.22 |
| yinyanghu | MOL004391 | tin-3-O-alpha-L-rhamnoside 1,2-bis(4-hydroxy-3-methoxyphenyl)propan-1,3-diol                                                                              | 290.4 | 4.99 | 48.54 | 1.53  | 0.99 | 0.3 | 0    | 18.7 |
| yinyanghu | MOL004394 | Icariin                                                                                                                                                   | 676.7 | 0.77 | 41.58 | -1.59 | -2.9 | 0.6 | 0    | 16.2 |
| yinyanghu | MOL004396 | Icariside A7                                                                                                                                              | 320.4 | 1.69 | 52.31 | 0     | -0.9 | 0.2 | 0    | 2.18 |
| yinyanghu | MOL004425 | luteolin                                                                                                                                                  | 676.7 | 0.77 | 41.58 | -1.82 | -3   | 0.6 | 0    | 19.9 |
| yinyanghu | MOL004427 | Magnograndiolide                                                                                                                                          | 462.5 | 1.16 | 31.91 | -0.65 | -1.6 | 0.9 | 0    | 2.84 |
| yinyanghu | MOL000006 | quercetin                                                                                                                                                 | 286.3 | 2.07 | 36.16 | 0.19  | -0.8 | 0.3 | 0.39 | 15.9 |
| yinyanghu | MOL000622 | berberine                                                                                                                                                 | 266.4 | 1.18 | 63.71 | 0.02  | -0.2 | 0.2 | 0.3  | 3.17 |
| yinyanghu | MOL000098 | coptisine                                                                                                                                                 | 302.3 | 1.5  | 46.43 | 0.05  | -0.8 | 0.3 | 0.38 | 14.4 |
| huangbai  | MOL001454 | Kihadalactone A                                                                                                                                           | 336.4 | 3.45 | 36.86 | 1.24  | 0.57 | 0.8 | 0.19 | 6.57 |
| huangbai  | MOL001458 | Obacunone                                                                                                                                                 | 320.3 | 3.25 | 30.67 | 1.21  | 0.32 | 0.9 | 0.26 | 9.33 |
| huangbai  | MOL002636 | Phellavin_qt                                                                                                                                              | 512.7 | 3.96 | 34.21 | 0.19  | -0.5 | 0.8 | 0.29 | -6.3 |
| huangbai  | MOL013352 | delta 7-stigmastenol                                                                                                                                      | 454.6 | 2.68 | 43.29 | 0.01  | -0.4 | 0.8 | 0.31 | -13  |
| huangbai  | MOL002641 | Phellopterin                                                                                                                                              | 374.4 | 2.51 | 35.86 | -0.41 | -1.3 | 0.4 | 0.33 | 15.8 |
| huangbai  | MOL002643 | Dehydrotanshinone II A                                                                                                                                    | 414.8 | 8.08 | 37.42 | 1.3   | 0.83 | 0.8 | 0.22 | 5.27 |
| huangbai  | MOL002644 | delta7-Dehydrosophoramine                                                                                                                                 | 300.3 | 3.64 | 40.19 | 0.98  | 0.48 | 0.3 | 0.24 | -1.6 |
| huangbai  | MOL002651 | dihydroniloticin                                                                                                                                          | 292.4 | 4.22 | 43.76 | 1.02  | 0.52 | 0.4 | 0.33 | 23.7 |
| huangbai  | MOL002652 | kihadanin A                                                                                                                                               | 242.4 | 1.09 | 54.45 | 0.99  | 0.75 | 0.3 | 0.22 | 5.52 |
| huangbai  | MOL002656 | niloticin                                                                                                                                                 | 458.8 | 5.66 | 36.43 | 0.65  | 0.03 | 0.8 | 0.25 | 7.04 |
| huangbai  | MOL002659 | rutaecarpine                                                                                                                                              | 486.6 | 1.76 | 31.6  | -0.93 | -1.4 | 0.7 | 0.38 | 2.68 |
| huangbai  | MOL002660 | Skimmianin                                                                                                                                                | 456.8 | 5.62 | 41.41 | 0.54  | -0.2 | 0.8 | 0.27 | 5.19 |
| huangbai  | MOL002662 | Cheteryunin                                                                                                                                               | 287.3 | 3.36 | 40.3  | 1.13  | 0.71 | 0.6 | 0.33 | 8.21 |
| huangbai  | MOL002663 | Stigmasterol                                                                                                                                              | 259.3 | 2.33 | 40.14 | 1.26  | 1.1  | 0.2 | 0.14 | -2.4 |
| huangbai  | MOL002666 | Worenine                                                                                                                                                  | 332.4 | 4.29 | 34.18 | 1.24  | 0.28 | 0.8 | 0.36 | 6.32 |
| huangbai  | MOL000449 | Cavidine                                                                                                                                                  | 412.8 | 7.64 | 43.83 | 1.44  | 1    | 0.8 | 0.22 | 5.57 |
| huangbai  | MOL002668 | Atenolol                                                                                                                                                  | 334.4 | 3.73 | 45.83 | 1.22  | 0.24 | 0.9 | 0.27 | 8.41 |
| huangbai  | MOL002670 | Hispidone                                                                                                                                                 | 353.5 | 3.72 | 35.64 | 1.08  | 0.63 | 0.8 | 0    | 5.78 |
| huangbai  | MOL002671 |                                                                                                                                                           | 608.8 | 3.63 | 31.81 | -0.39 | -1.2 | 0.7 | 0.32 | -0.4 |
| huangbai  | MOL002672 |                                                                                                                                                           | 580.9 | 9.95 | 39    | 0.8   | 0.16 | 0.6 | 0.22 | 3.62 |
| huangbai  | MOL002673 |                                                                                                                                                           | 472.8 | 4.46 | 36.18 | 0.12  | -0.7 | 0.8 | 0.25 | 5.08 |

|          |           |                                                    |       |       |       |       |      |     |      |      |
|----------|-----------|----------------------------------------------------|-------|-------|-------|-------|------|-----|------|------|
| huangbai | MOL000358 | beta-sitosterol                                    | 414.8 | 8.08  | 36.91 | 1.32  | 0.99 | 0.8 | 0.23 | 5.36 |
| huangbai | MOL000622 | Magnograndiolide                                   | 266.4 | 1.18  | 63.71 | 0.02  | -0.2 | 0.2 | 0.3  | 3.17 |
| huangbai | MOL000762 | Palmidin A                                         | 510.5 | 4.52  | 35.36 | -0.38 | -1.5 | 0.7 | 0.39 | 33.2 |
| huangbai | MOL000785 | palmatine                                          | 352.4 | 3.65  | 64.6  | 1.33  | 0.37 | 0.7 | 0.13 | 2.25 |
| huangbai | MOL000787 | Fumarine                                           | 353.4 | 2.95  | 59.26 | 0.56  | -0.1 | 0.8 | 0.3  | 23.5 |
| huangbai | MOL000790 | Isocorypalmine                                     | 341.4 | 3.35  | 35.77 | 0.85  | 0.43 | 0.6 | 0.21 | 2.47 |
| huangbai | MOL000098 | quercetin                                          | 302.3 | 1.5   | 46.43 | 0.05  | -0.8 | 0.3 | 0.38 | 14.4 |
| huangbai | MOL001131 | phellamurin_qt                                     | 356.4 | 3.61  | 56.6  | 0.14  | -0.5 | 0.4 | 0.38 | 14.9 |
| huangbai | MOL001455 | (S)-Canadine                                       | 339.4 | 3.4   | 53.83 | 1.01  | 0.64 | 0.8 | 0.19 | 6.56 |
| huangbai | MOL001771 | poriferast-5-en-3beta-ol N-                        | 414.8 | 8.08  | 36.91 | 1.45  | 1.14 | 0.8 | 0    | 5.07 |
| huangbai | MOL002331 | Methylflindersine                                  | 241.3 | 1.72  | 32.36 | 1.35  | 1.1  | 0.2 | 0.33 | 0.41 |
| huangbai | MOL002894 | berberrubine                                       | 322.4 | 3.2   | 35.74 | 1.07  | 0.17 | 0.7 | 0.24 | 6.46 |
| huangbai | MOL005438 | campesterol                                        | 400.8 | 7.63  | 37.58 | 1.34  | 0.95 | 0.7 | 0.22 | 4.83 |
| huangbai | MOL006392 | dihydroniloticin                                   | 458.8 | 5.66  | 36.43 | 0.64  | 0.1  | 0.8 | 0.24 | 6.46 |
| huangbai | MOL006401 | melianone                                          | 470.8 | 4.76  | 40.53 | 0.4   | -0.3 | 0.8 | 0.27 | 6.09 |
| huangbai | MOL006413 | phellochin                                         | 488.8 | 5.26  | 35.41 | 0.47  | -0   | 0.8 | 0.24 | 6.64 |
| huangbai | MOL006422 | thalifendine                                       | 322.4 | 3.2   | 44.41 | 1.12  | 0.21 | 0.7 | 0.22 | 5.99 |
| gouqizi  | MOL001323 | Sitosterol alpha1                                  | 426.8 | 8.15  | 43.28 | 1.41  | 0.97 | 0.8 | 0.24 | 5.64 |
| gouqizi  | MOL003578 | Cycloartenol                                       | 426.8 | 7.55  | 38.69 | 1.53  | 1.33 | 0.8 | 0    | 5    |
| gouqizi  | MOL001494 | Mandenol                                           | 308.6 | 6.99  | 42    | 1.46  | 1.14 | 0.2 | 0.25 | 5.39 |
| gouqizi  | MOL001495 | Ethyl linolenate                                   | 306.5 | 6.55  | 46.1  | 1.54  | 1.12 | 0.2 | 0.25 | 6.2  |
| gouqizi  | MOL001979 | LAN                                                | 426.8 | 8.12  | 42.12 | 1.52  | 1.18 | 0.8 | 0.23 | 5.84 |
| gouqizi  | MOL000449 | Stigmasterol                                       | 412.8 | 7.64  | 43.83 | 1.44  | 1    | 0.8 | 0.22 | 5.57 |
| gouqizi  | MOL000358 | beta-sitosterol                                    | 414.8 | 8.08  | 36.91 | 1.32  | 0.99 | 0.8 | 0.23 | 5.36 |
| gouqizi  | MOL005406 | atropine                                           | 289.4 | 1.72  | 45.97 | 0.43  | 0.01 | 0.2 | 0.28 | 2.75 |
| gouqizi  | MOL005438 | campesterol                                        | 400.8 | 7.63  | 37.58 | 1.34  | 0.95 | 0.7 | 0.22 | 4.83 |
| gouqizi  | MOL006209 | cyanin 24-                                         | 411.7 | 7.08  | 47.42 | 1.78  | 0.99 | 0.8 | 0.28 | 2.72 |
| gouqizi  | MOL007449 | methylidenelophenol                                | 412.8 | 7.75  | 44.19 | 1.41  | 1    | 0.8 | 0.24 | 5.1  |
| gouqizi  | MOL008173 | daucosterol_qt                                     | 414.8 | 8.08  | 36.91 | 1.33  | 0.85 | 0.8 | 0.23 | 5.6  |
| gouqizi  | MOL008400 | glycitein                                          | 284.3 | 2.32  | 50.48 | 0.56  | -0.3 | 0.2 | 0.3  | 16.3 |
| gouqizi  | MOL010234 | delta-Carotene                                     | 537   | 12.19 | 31.8  | 2.33  | 1.42 | 0.6 | 0.35 | 2.62 |
| gouqizi  | MOL000953 | CLR                                                | 386.7 | 7.38  | 37.87 | 1.43  | 1.13 | 0.7 | 0.2  | 4.52 |
| gouqizi  | MOL009604 | 14b-pregnane (24R)-                                | 288.6 | 6.54  | 34.78 | 1.8   | 1.95 | 0.3 | 0.2  | 4.57 |
| gouqizi  | MOL009612 | 4alpha-Methyl-24-ethylcholesta-7,25-dien-3beta-24- | 482.9 | 8.79  | 46.36 | 1.39  | 1    | 0.8 | 0.26 | 8.25 |
| gouqizi  | MOL009615 | Methylenecycloartan-3beta,21-                      | 456.8 | 6.7   | 37.32 | 0.95  | 0.3  | 0.8 | 0.23 | 5.67 |

|         |           |                                                 |       |      |       |      |      |     |      |      |
|---------|-----------|-------------------------------------------------|-------|------|-------|------|------|-----|------|------|
| gouqizi | MOL009617 | 24-ethylcholest-22-enol                         | 414.8 | 7.89 | 37.09 | 1.33 | 0.99 | 0.8 | 0.21 | 5.32 |
| gouqizi | MOL009618 | 24-ethylcholesta-5,22-dienol                    | 412.8 | 7.64 | 43.83 | 1.31 | 0.84 | 0.8 | 0.22 | 5.76 |
| gouqizi | MOL009620 | 24-methyl-31-norlanost-24-                      | 428.8 | 8.15 | 38    | 1.33 | 0.93 | 0.8 | 0.23 | 5.49 |
| gouqizi | MOL009621 | methylenelanol-8-enol                           | 440.8 | 8.43 | 42.37 | 1.44 | 1.18 | 0.8 | 0.25 | 5.43 |
| gouqizi | MOL009622 | Fucosterol                                      | 412.8 | 7.83 | 43.78 | 1.34 | 1.01 | 0.8 | 0.24 | 5.44 |
| gouqizi | MOL009631 | 31-Norcyclolaudenol                             | 440.8 | 8.04 | 38.68 | 1.35 | 0.94 | 0.8 | 0.25 | 4.88 |
| gouqizi | MOL009633 | 31-norlanost-31-                                | 414.8 | 7.9  | 38.35 | 1.34 | 1.03 | 0.7 | 0.22 | 5.37 |
| gouqizi | MOL009634 | 31-norlanosterol                                | 412.8 | 7.85 | 42.2  | 1.4  | 1.03 | 0.7 | 0.24 | 5.27 |
| gouqizi | MOL009635 | 4,24-methyllophenol                             | 414.8 | 7.95 | 37.83 | 1.43 | 1.1  | 0.8 | 0.22 | 4.9  |
| gouqizi | MOL009639 | Lophenol                                        | 400.8 | 7.7  | 38.13 | 1.36 | 1.1  | 0.7 | 0.2  | 4.76 |
| gouqizi | MOL009640 | 4alpha,14alpha,24-trimethylcholesta-8,24-dienol | 426.8 | 8.29 | 38.91 | 1.4  | 1.06 | 0.8 | 0.24 | 6.67 |
| gouqizi | MOL009641 | 4alpha,24-dimethylcholesta-7,24-dienol          | 412.8 | 7.89 | 42.65 | 1.43 | 0.98 | 0.8 | 0.23 | 5.44 |
| gouqizi | MOL009642 | 4alpha-methyl-24-ethylcholesta-7,24-dienol      | 426.8 | 8.35 | 42.3  | 1.45 | 1.08 | 0.8 | 0.23 | 5.83 |
| gouqizi | MOL009644 | 6-Fluoroindole-7-Dehydrocholesterol             | 402.7 | 7.04 | 43.73 | 1.03 | 0.54 | 0.7 | 0.24 | 5.1  |
| gouqizi | MOL009646 | 7-O-Methyluteolin-6-C-beta-glucoside            | 318.3 | 2.01 | 40.77 | 0.33 | -0.5 | 0.3 | 0.29 | 14.1 |
| gouqizi | MOL009650 | Atropine                                        | 289.4 | 1.72 | 42.16 | 0.57 | 0.39 | 0.2 | 0.26 | 5.27 |
| gouqizi | MOL009651 | Cryptoxanthin                                   | 569   | 9.5  | 46.95 | 1.49 | -0   | 0.6 | 0.33 | 4.4  |
| gouqizi | MOL009653 | Cycloeucalenol                                  | 426.8 | 7.59 | 39.73 | 1.42 | 1.04 | 0.8 | 0.23 | 5.01 |
| gouqizi | MOL009656 | (E,E)-1-ethyl octadeca-3,13-                    | 308.6 | 6.99 | 42    | 1.46 | 1.11 | 0.2 | 0.21 | 5.47 |

[illegible]

|        |           |                                                         |                           |       |       |       |      |     |      |      |  |
|--------|-----------|---------------------------------------------------------|---------------------------|-------|-------|-------|------|-----|------|------|--|
| guiban |           | Cholesteric<br>4,6-diene-3-ol                           | from literature searching |       |       |       |      |     |      |      |  |
| guiban |           | coloagen                                                | from literature searching |       |       |       |      |     |      |      |  |
| guiban |           | Eighteen methyl                                         | from literature searching |       |       |       |      |     |      |      |  |
| guiban |           | keratin                                                 | from literature searching |       |       |       |      |     |      |      |  |
| guiban |           | Sixteen ethyl                                           | from literature searching |       |       |       |      |     |      |      |  |
| guiban |           | Sixteen methyl                                          | from literature searching |       |       |       |      |     |      |      |  |
| guiban |           | Sterol ester<br>myristate                               | from literature searching |       |       |       |      |     |      |      |  |
| guiban |           | cholesterol<br>myristate                                | from literature searching |       |       |       |      |     |      |      |  |
| guiban |           | 7-hexadecanoic acid                                     | from literature searching |       |       |       |      |     |      |      |  |
| guiban |           | 11-hexadecanoic acid                                    | from literature searching |       |       |       |      |     |      |      |  |
| guiban |           | 9-hexadecanoic acid                                     | from literature searching |       |       |       |      |     |      |      |  |
| guiban |           | 11-octadecadienoic acid                                 | from literature searching |       |       |       |      |     |      |      |  |
| guiban |           | 10-octadecenoic acid                                    | from literature searching |       |       |       |      |     |      |      |  |
| guiban |           | 10-octadecenoic acid                                    | from literature searching |       |       |       |      |     |      |      |  |
| guiban |           | 10-octadecenoic acid                                    | from literature searching |       |       |       |      |     |      |      |  |
| chaihu | MOL001645 | Linoleyl acetate                                        | 308.6                     | 6.85  | 42.1  | 1.36  | 1.08 | 0.2 | 0.21 | 7.48 |  |
| chaihu | MOL002776 | Baicalin                                                | 446.4                     | 0.64  | 40.12 | -0.85 | -1.7 | 0.8 | 0.36 | 17.4 |  |
| chaihu | MOL000449 | Stigmasterol                                            | 412.8                     | 7.64  | 43.83 | 1.44  | 1    | 0.8 | 0.22 | 5.57 |  |
| chaihu | MOL000354 | isorhamnetin                                            | 316.3                     | 1.76  | 49.6  | 0.31  | -0.5 | 0.3 | 0.32 | 14.3 |  |
| chaihu | MOL000422 | kaempferol                                              | 286.3                     | 1.77  | 41.88 | 0.26  | -0.6 | 0.2 | 0    | 14.7 |  |
| chaihu | MOL004598 | 3,5,6,7-tetramethoxy-2-(3,4,5-trimethoxyphenyl)chromone | 432.5                     | 2.54  | 31.97 | 0.75  | 0.08 | 0.6 | 0.13 | 15.5 |  |
| chaihu | MOL004609 | Areapillin                                              | 360.3                     | 2.29  | 48.96 | 0.6   | -0.3 | 0.4 | 0.16 | 16.5 |  |
| chaihu | MOL013187 | Cubebin                                                 | 356.4                     | 3.19  | 57.13 | 0.47  | -0.4 | 0.6 | 0.31 | 12.4 |  |
| chaihu | MOL004624 | Unguismaurum                                            | 348.5                     | 1.16  | 47.72 | 0.08  | 0.09 | 0.5 | 0.27 | 1.71 |  |
| chaihu | MOL004628 | Octalupine                                              | 264.4                     | -0.07 | 47.82 | 0.48  | 0.3  | 0.3 | 0.17 | 4.17 |  |
| chaihu | MOL004644 | Sainfuran                                               | 286.3                     | 3.38  | 79.91 | 0.9   | 0.23 | 0.2 | 0.22 | 8.58 |  |
| chaihu | MOL004648 | Troxeutin                                               | 346.6                     | 5.89  | 31.6  | 0.35  | -0.4 | 0.3 | 0.3  | 4.36 |  |
| chaihu | MOL004653 | (7)-Anemalin                                            | 426.5                     | 5.05  | 46.06 | 0.46  | 0    | 0.7 | 0.36 | 1.03 |  |
| chaihu | MOL004702 | saikosaponin c <sub>qt</sub>                            | 472.8                     | 3.71  | 30.5  | 0.03  | -0.9 | 0.6 | 0.2  | 6.12 |  |
| chaihu | MOL004718 | spinasterol                                             | 412.8                     | 7.64  | 42.98 | 1.28  | 0.79 | 0.8 | 0.22 | 6.46 |  |
| chaihu | MOL000490 | petunidin                                               | 317.3                     | 1.65  | 30.05 | 0.16  | -0.6 | 0.3 | 0    | 1.21 |  |
| chaihu | MOL000098 | quercetin                                               | 302.3                     | 1.5   | 46.43 | 0.05  | -0.8 | 0.3 | 0.38 | 14.4 |  |

|            |           |                 |       |      |       |      |      |     |      |      |
|------------|-----------|-----------------|-------|------|-------|------|------|-----|------|------|
| danggui    | MOL000358 | beta-sitosterol | 414.8 | 8.08 | 36.91 | 1.32 | 0.99 | 0.8 | 0.23 | 5.36 |
| danggui    | MOL000449 | Stigmasterol    | 412.8 | 7.64 | 43.83 | 1.44 | 1    | 0.8 | 0.22 | 5.57 |
| chuanxiong | MOL001494 | Mandenol        | 308.6 | 6.99 | 42    | 1.46 | 1.14 | 0.2 | 0.25 | 5.39 |
| chuanxiong | MOL002135 | Myricanone      | 356.5 | 4.1  | 40.6  | 0.67 | -0.1 | 0.5 | 0.24 | 4.39 |
| chuanxiong | MOL002140 | Perlolyrine     | 264.3 | 3.2  | 65.95 | 0.88 | 0.15 | 0.3 | 0.21 | 12.6 |
| chuanxiong | MOL002151 | senkyunone      | 326.5 | 6.32 | 47.66 | 1.15 | 0.5  | 0.2 | 0.34 | 2.42 |
| chuanxiong | MOL002157 | wallichilide    | 412.6 | 4.82 | 42.31 | 0.82 | 0.73 | 0.7 | 0.24 | 6.85 |
| chuanxiong | MOL000359 | sitosterol      | 414.8 | 8.08 | 36.91 | 1.32 | 0.87 | 0.8 | 0.22 | 5.37 |
| chuanxiong | MOL000433 | FA              | 441.5 | 0.01 | 68.96 | -1.5 | -2.6 | 0.7 | 0    | 24.8 |

## Supplementary Table S2: MGNC therapeutic targets

| MOL_ID    | molecule_name   | target_name     | target_ID | drugbank_validate | SVM_score | RF_score |
|-----------|-----------------|-----------------|-----------|-------------------|-----------|----------|
| MOL012254 | campesterol     | Progesterone    | 209       | 614               | 0.9124    | 0.724    |
| MOL000519 | coniferin       | Muscarinic ac   | 16        | 51                | 0.94441   | 0.704    |
| MOL000520 | coniferin       | Muscarinic ac   | 38        | 103               | 0.82877   | 0.714    |
| MOL000521 | coniferin       | Estrogen rece   | 46        | 136               | 0.92268   | 0.752    |
| MOL000522 | coniferin       | Androgen rec    | 48        | 146               | 0.82951   | 0.76     |
| MOL000523 | coniferin       | Sodium chan     | 70        | 220               | 0.9576    | 0.732    |
| MOL000524 | coniferin       | Peroxisome p    | 78        | 238               |           |          |
| MOL000525 | coniferin       | Prostaglandir   | 94        | 290               | 0.89632   | 0.718    |
| MOL000526 | coniferin       | Carbonic anh    | 117       | 357               | 0.80484   | 0.75     |
| MOL000527 | coniferin       | CGMP-inhibi     | 172       | 485               | 0.94787   | 0.708    |
| MOL000528 | coniferin       | Alpha-1B adr    | 216       | 632               | 0.90311   | 0.714    |
| MOL000529 | coniferin       | Beta-2 adren    | 261       | 766               | 0.95553   | 0.726    |
| MOL000530 | coniferin       | Alpha-1D ad     | 272       | 789               | 0.8257    | 0.714    |
| MOL000531 | coniferin       | DNA topoiso     | 287       | 817               |           |          |
| MOL000532 | coniferin       | Mu-type opic    | 299       | 847               |           |          |
| MOL000533 | coniferin       | Cell division p | 482       | 2240              |           |          |
| MOL000534 | coniferin       | Beta-lactama    | 499       | 2478              |           |          |
| MOL000535 | coniferin       | Neuronal ace    | 581       | 4095              | 0.81105   | 0.754    |
| MOL000536 | coniferin       | Ig gamma-1      | 1201      | 4785              | 0.95592   | 0.7      |
| MOL000537 | coniferin       | Proto-oncog     | 2966      | 2347              |           |          |
| MOL000538 | coniferin       | Cyclin-A2       | 3025      | 6235              |           |          |
| MOL000539 | coniferin       | Nuclear recep   | 3276      | 6241              | 0.87343   | 0.7      |
| MOL000540 | coniferin       | Nuclear recep   | 3279      | 6228              | 0.90386   | 0.738    |
| MOL000359 | beta-sitosterol | Progesterone    | 209       | 614               | 0.9124    | 0.724    |
| MOL000360 | beta-sitosterol | Nuclear recep   | 3276      | 6241              | 0.87343   | 0.7      |
| MOL000361 | beta-sitosterol | Mineralocorti   | 252       | 737               | 0.93891   | 0.702    |
| MOL001454 | berberine       | Nitric oxide s  | 3         | 7                 | 0.9572    | 0.766    |
| MOL001454 | berberine       | Prostaglandir   | 6         | 20                | 0.93024   | 0.728    |
| MOL001454 | berberine       | Potassium vo    | 37        | 101               | 0.9384    | 0.716    |
| MOL001454 | berberine       | Estrogen rece   | 46        | 136               | 0.97408   | 0.788    |
| MOL001454 | berberine       | Androgen rec    | 48        | 146               | 0.94738   | 0.748    |
| MOL001454 | berberine       | Sodium chan     | 70        | 220               | 0.92482   | 0.708    |
| MOL001454 | berberine       | Coagulation t   | 79        | 239               | 0.86999   | 0.71     |
| MOL001454 | berberine       | Prostaglandir   | 94        | 290               | 0.94009   | 0.792    |
| MOL001454 | berberine       | Nitric-oxide s  | 95        | 291               | 0.86725   | 0.706    |
| MOL001454 | berberine       | Retinoic acid   | 158       | 459               | 0.95452   | 0.716    |
| MOL001454 | berberine       | Beta-2 adren    | 261       | 766               | 0.90978   | 0.708    |
| MOL001454 | berberine       | Heat shock p    | 444       | 1939              | 0.9614    | 0.712    |
| MOL001454 | berberine       | mRNA of PKA     | 699       | 6263              | 0.92072   | 0.724    |
| MOL001454 | berberine       | Trypsin-1       | 2928      | 3176              | 0.90173   | 0.728    |
| MOL001454 | berberine       | Nuclear recep   | 3276      | 6241              | 0.8557    | 0.748    |
| MOL001454 | berberine       | cAMP and cA     | 3868      | 695               | 0.96057   | 0.704    |
| MOL001454 | berberine       | Calmodulin      | 3907      | 465               | 0.82146   | 0.772    |
| MOL002894 | berberrubine    | Nitric oxide s  | 3         | 7                 | 0.94015   | 0.762    |
| MOL002894 | berberrubine    | Prostaglandir   | 6         | 20                | 0.92413   | 0.718    |
| MOL002894 | berberrubine    | Potassium vo    | 37        | 101               | 0.90596   | 0.704    |
| MOL002894 | berberrubine    | Estrogen rece   | 46        | 136               | 0.97252   | 0.806    |
| MOL002894 | berberrubine    | Androgen rec    | 48        | 146               | 0.92606   | 0.76     |
| MOL002894 | berberrubine    | Sodium chan     | 70        | 220               | 0.87477   | 0.716    |

|           |              |                |      |      |         |       |
|-----------|--------------|----------------|------|------|---------|-------|
| MOL002894 | berberrubine | Prostaglandin  | 94   | 290  | 0.93794 | 0.782 |
| MOL002894 | berberrubine | Nitric-oxide s | 95   | 291  | 0.83326 | 0.7   |
| MOL002894 | berberrubine | Retinoic acid  | 158  | 459  | 0.94715 | 0.716 |
| MOL002894 | berberrubine | mRNA of PKA    | 699  | 6263 | 0.93266 | 0.71  |
| MOL002894 | berberrubine | Trypsin-1      | 2928 | 3176 | 0.87466 | 0.726 |
| MOL002894 | berberrubine | Nuclear recep  | 3276 | 6241 | 0.82747 | 0.746 |
| MOL002894 | berberrubine | Calmodulin     | 3907 | 465  | 0.80782 | 0.744 |
| MOL002897 | epiberberine | Nitric oxide s | 3    | 7    | 0.94664 | 0.75  |
| MOL002897 | epiberberine | Potassium vo   | 37   | 101  | 0.92901 | 0.71  |
| MOL002897 | epiberberine | Estrogen rece  | 46   | 136  | 0.96947 | 0.778 |
| MOL002897 | epiberberine | Androgen rec   | 48   | 146  | 0.93597 | 0.754 |
| MOL002897 | epiberberine | Prostaglandin  | 94   | 290  | 0.93278 | 0.764 |
| MOL002897 | epiberberine | Nitric-oxide s | 95   | 291  | 0.85393 | 0.712 |
| MOL002897 | epiberberine | Retinoic acid  | 158  | 459  | 0.94814 | 0.702 |
| MOL002897 | epiberberine | mRNA of PKA    | 699  | 6263 | 0.91455 | 0.706 |
| MOL002897 | epiberberine | Trypsin-1      | 2928 | 3176 | 0.85963 | 0.706 |
| MOL002897 | epiberberine | Nuclear recep  | 3276 | 6241 | 0.80776 | 0.74  |
| MOL002897 | epiberberine | cAMP and cA    | 3868 | 695  | 0.95576 | 0.708 |
| MOL002903 | (R)-Canadine | Prostaglandin  | 6    | 20   | 0.84257 | 0.7   |
| MOL002903 | (R)-Canadine | Muscarinic ac  | 16   | 51   | 0.97603 | 0.75  |
| MOL002903 | (R)-Canadine | Potassium vo   | 37   | 101  | 0.95073 | 0.728 |
| MOL002903 | (R)-Canadine | Muscarinic ac  | 38   | 103  | 0.98287 | 0.744 |
| MOL002903 | (R)-Canadine | Sodium chan    | 70   | 220  | 0.97574 | 0.75  |
| MOL002903 | (R)-Canadine | Coagulation t  | 79   | 239  | 0.82243 | 0.722 |
| MOL002903 | (R)-Canadine | Muscarinic ac  | 87   | 274  | 0.97994 | 0.736 |
| MOL002903 | (R)-Canadine | Prostaglandin  | 94   | 290  | 0.86731 | 0.786 |
| MOL002903 | (R)-Canadine | 5-hydroxytry   | 113  | 341  | 0.96946 | 0.714 |
| MOL002903 | (R)-Canadine | Alpha-2C ad    | 126  | 378  | 0.93886 | 0.7   |
| MOL002903 | (R)-Canadine | Muscarinic ac  | 154  | 450  | 0.97505 | 0.728 |
| MOL002903 | (R)-Canadine | Delta-type op  | 163  | 467  | 0.98603 | 0.734 |
| MOL002903 | (R)-Canadine | 5-hydroxytry   | 175  | 502  | 0.97854 | 0.72  |
| MOL002903 | (R)-Canadine | 5-hydroxytry   | 203  | 590  | 0.96884 | 0.716 |
| MOL002903 | (R)-Canadine | Alpha-1B ad    | 216  | 632  | 0.97086 | 0.736 |
| MOL002903 | (R)-Canadine | Sodium-depe    | 239  | 713  | 0.96808 | 0.708 |
| MOL002903 | (R)-Canadine | Beta-2 adren   | 261  | 766  | 0.97108 | 0.726 |
| MOL002903 | (R)-Canadine | Alpha-1D ad    | 272  | 789  | 0.95476 | 0.748 |
| MOL002903 | (R)-Canadine | Sodium-depe    | 290  | 824  | 0.9753  | 0.718 |
| MOL002903 | (R)-Canadine | Mu-type opic   | 299  | 847  | 0.97475 | 0.716 |
| MOL002903 | (R)-Canadine | Heat shock p   | 444  | 1939 | 0.95298 | 0.716 |
| MOL002903 | (R)-Canadine | mRNA of PKA    | 699  | 6263 | 0.80617 | 0.714 |
| MOL002903 | (R)-Canadine | cAMP and cA    | 3868 | 695  | 0.93205 | 0.708 |
| MOL002903 | (R)-Canadine | Calmodulin     | 3907 | 465  | 0.83509 | 0.774 |
| MOL002903 | (R)-Canadine | Dopamine D     | 7    | 23   | 0.97901 | 0.73  |
| MOL002903 | (R)-Canadine | D(1B) dopam    | 56   | 163  | 0.94348 | 0.706 |
| MOL002903 | (R)-Canadine | Retinoic acid  | 158  | 459  | 0.93099 | 0.714 |
| MOL002903 | (R)-Canadine | Sodium-depe    | 186  | 540  | 0.97093 | 0.702 |
| MOL002903 | (R)-Canadine | Alpha-1A ad    | 191  | 556  | 0.98289 | 0.704 |
| MOL002903 | (R)-Canadine | Muscarinic ac  | 210  | 617  | 0.9824  | 0.714 |
| MOL002903 | (R)-Canadine | Calcium-activ  | 3727 | 610  | 0.92839 | 0.702 |
| MOL002904 | Berlambine   | Nitric oxide s | 3    | 7    | 0.95967 | 0.744 |
| MOL002904 | Berlambine   | Prostaglandin  | 6    | 20   | 0.93167 | 0.734 |
| MOL002904 | Berlambine   | Muscarinic ac  | 16   | 51   | 0.93836 | 0.702 |
| MOL002904 | Berlambine   | Potassium vo   | 37   | 101  | 0.95911 | 0.732 |
| MOL002904 | Berlambine   | Androgen rec   | 48   | 146  | 0.94862 | 0.78  |

|           |              |                 |      |      |          |         |       |
|-----------|--------------|-----------------|------|------|----------|---------|-------|
| MOL002904 | Berlambine   | Sodium chan     | 70   | 220  |          | 0.96195 | 0.74  |
| MOL002904 | Berlambine   | Coagulation t   | 79   | 239  |          | 0.88515 | 0.732 |
| MOL002904 | Berlambine   | Prostaglandir   | 94   | 290  |          | 0.93241 | 0.796 |
| MOL002904 | Berlambine   | Nitric-oxide s  | 95   | 291  |          | 0.88795 | 0.708 |
| MOL002904 | Berlambine   | Coagulation t   | 123  | 369  |          | 0.92161 | 0.704 |
| MOL002904 | Berlambine   | Retinoic acid   | 158  | 459  |          | 0.93548 | 0.702 |
| MOL002904 | Berlambine   | Alpha-1B adr    | 216  | 632  |          | 0.92113 | 0.706 |
| MOL002904 | Berlambine   | Beta-2 adren    | 261  | 766  |          | 0.94851 | 0.72  |
| MOL002904 | Berlambine   | Alpha-1D ad     | 272  | 789  |          | 0.89667 | 0.704 |
| MOL002904 | Berlambine   | Heat shock p    | 444  | 1939 |          | 0.95679 | 0.72  |
| MOL002904 | Berlambine   | mRNA of PKA     | 699  | 6263 |          | 0.8971  | 0.712 |
| MOL002904 | Berlambine   | Trypsin-1       | 2928 | 3176 |          | 0.93003 | 0.724 |
| MOL002904 | Berlambine   | Nuclear recep   | 3276 | 6241 |          | 0.83833 | 0.774 |
| MOL002904 | Berlambine   | Calcium-activ   | 3727 | 610  |          | 0.92439 | 0.706 |
| MOL002904 | Berlambine   | Calmodulin      | 3907 | 465  |          | 0.81185 | 0.76  |
| MOL002907 | Corchoroside | Mineralocorti   | 252  | 737  |          | 0.93335 | 0.724 |
| MOL002907 | Corchoroside | Nuclear recep   | 3276 | 6241 |          | 0.84359 | 0.704 |
| MOL000622 | Magnogrand   | Gamma-amir      | 141  | 423  |          | 0.85969 | 0.702 |
| MOL000622 | Magnogrand   | Gamma-amir      | 309  | 872  |          | 0.90908 | 0.768 |
| MOL000622 | Magnogrand   | Glutamate re    | 3216 | 921  |          | 0.80126 | 0.71  |
| MOL000622 | Magnogrand   | Gamma-amir      | 3284 | 841  |          | 0.83153 | 0.73  |
| MOL000785 | palmatine    | Nitric oxide s  | 3    | 7    |          | 0.95066 | 0.742 |
| MOL000785 | palmatine    | Prostaglandir   | 6    | 20   |          | 0.91977 | 0.72  |
| MOL000785 | palmatine    | Potassium vo    | 37   | 101  |          | 0.93908 | 0.734 |
| MOL000785 | palmatine    | Estrogen rece   | 46   | 136  |          | 0.97493 | 0.808 |
| MOL000785 | palmatine    | Androgen rec    | 48   | 146  |          | 0.94936 | 0.75  |
| MOL000785 | palmatine    | Sodium chan     | 70   | 220  |          | 0.93265 | 0.714 |
| MOL000785 | palmatine    | Prostaglandir   | 94   | 290  |          | 0.93279 | 0.786 |
| MOL000785 | palmatine    | Nitric-oxide s  | 95   | 291  |          | 0.87177 | 0.702 |
| MOL000785 | palmatine    | Retinoic acid   | 158  | 459  |          | 0.95369 | 0.72  |
| MOL000785 | palmatine    | Beta-2 adren    | 261  | 766  |          | 0.93694 | 0.704 |
| MOL000785 | palmatine    | Estrogen rece   | 307  | 869  |          | 0.97533 | 0.754 |
| MOL000785 | palmatine    | Heat shock p    | 444  | 1939 |          | 0.9619  | 0.7   |
| MOL000785 | palmatine    | Trypsin-1       | 2928 | 3176 |          | 0.91946 | 0.73  |
| MOL000785 | palmatine    | Proto-oncog     | 2966 | 2347 |          | 0.9461  | 0.732 |
| MOL000785 | palmatine    | Nuclear recep   | 3276 | 6241 |          | 0.85844 | 0.764 |
| MOL000785 | palmatine    | Calmodulin      | 3907 | 465  |          | 0.82113 | 0.748 |
| MOL000785 | palmatine    | mRNA of PKA     | 699  | 6263 |          | 0.88735 | 0.7   |
| MOL000785 | palmatine    | Cell division p | 482  | 2240 |          | 0.95713 | 0.704 |
| MOL000785 | palmatine    | Coagulation t   | 123  | 369  |          | 0.91001 | 0.704 |
| MOL000098 | quercetin    | Prostaglandir   | 6    | 20   | validate | 0.90156 | 0.716 |
| MOL000098 | quercetin    | Androgen rec    | 48   | 146  | validate | 0.85704 | 0.77  |
| MOL000098 | quercetin    | Peroxisome p    | 78   | 238  |          | 0.8842  | 0.708 |
| MOL000098 | quercetin    | Prostaglandir   | 94   | 290  | validate | 0.94013 | 0.82  |
| MOL000098 | quercetin    | Heat shock p    | 444  | 1939 |          | 0.96306 | 0.722 |
| MOL000098 | quercetin    | Phosphatidyl    | 491  | 2404 |          | 0.92872 | 0.74  |
| MOL000098 | quercetin    | Nuclear recep   | 3276 | 6241 |          | 0.80225 | 0.788 |
| MOL000098 | quercetin    | Dipeptidyl pe   | 332  | 952  |          | 0.86884 | 0.702 |
| MOL000098 | quercetin    | Aldose reduc    | 288  | 822  |          | 0.88904 | 0.712 |
| MOL000098 | quercetin    | Trypsin-1       | 2928 | 3176 |          | 0.87955 | 0.796 |
| MOL000098 | quercetin    | DNA topoiso     | 287  | 817  |          | 0.84204 | 0.714 |
| MOL000098 | quercetin    | Thrombin        | 17   | 54   |          | 0.93571 | 0.806 |
| MOL000098 | quercetin    | Potassium vo    | 37   | 101  |          | 0.85982 | 0.702 |
| MOL000098 | quercetin    | Sodium chan     | 70   | 220  |          | 0.82159 | 0.714 |

|           |           |                  |      |      |                        |       |
|-----------|-----------|------------------|------|------|------------------------|-------|
| MOL000098 | quercetin | Coagulation f    | 79   | 239  | 0.8378                 | 0.708 |
| MOL000098 | quercetin | Beta-2 adren     | 261  | 766  | 0.86449                | 0.708 |
| MOL000098 | quercetin | Stromelysin-     | 441  | 1926 | 0.84037                | 0.712 |
| MOL000098 | quercetin | mRNA of PKA      | 699  | 6263 | 0.81288                | 0.766 |
| MOL000098 | quercetin | Coagulation f    | 123  | 369  | 0.80139                | 0.708 |
| MOL000098 | quercetin | Nitric-oxide s   | 95   | 291  | 0.87242                | 0.754 |
| MOL000098 | quercetin | Retinoic acid    | 158  | 459  | 0.93284                | 0.704 |
| MOL000098 | quercetin | Acetylcholine    | 165  | 474  | 0.87927                | 0.7   |
| MOL000098 | quercetin | Gamma-amir       | 309  | 872  | 0.91336                | 0.706 |
| MOL000098 | quercetin | Amine oxidas     | 565  | 3939 | 0.8018                 | 0.706 |
| MOL000098 | quercetin | Transcription    | 4565 | h001 | validate,RF_score":nul |       |
| MOL000098 | quercetin | Epidermal gr     | 298  | 844  | validate,RF_score":nul |       |
| MOL000098 | quercetin | RAC-alpha se     | 4490 | h001 | validate,RF_score":nul |       |
| MOL000098 | quercetin | Vascular end     | 740  | 183  | validate,RF_score":nul |       |
| MOL000098 | quercetin | G1/S-specific    | 4214 | h001 | validate,RF_score":nul |       |
| MOL000098 | quercetin | Apoptosis reg    | 86   | 273  | validate,RF_score":nul |       |
| MOL000098 | quercetin | Bcl-2-like pro   | 4054 | h001 | validate,RF_score":nul |       |
| MOL000098 | quercetin | Proto-oncog      | 4478 | h001 | validate,RF_score":nul |       |
| MOL000098 | quercetin | Cyclin-depen     | 4141 | h001 | validate,RF_score":nul |       |
| MOL000098 | quercetin | Eukaryotic tra   | 4197 | h001 | validate,RF_score":nul |       |
| MOL000098 | quercetin | Apoptosis reg    | 4033 | h001 | validate,RF_score":nul |       |
| MOL000098 | quercetin | Caspase-9        | 4090 | h001 | validate,RF_score":nul |       |
| MOL000098 | quercetin | Urokinase-ty     | 346  | 1074 | validate,RF_score":nul |       |
| MOL000098 | quercetin | 72 kDa type I    | 238  | 707  | validate,RF_score":nul |       |
| MOL000098 | quercetin | Matrix metall    | 4334 | h001 | validate,RF_score":nul |       |
| MOL000098 | quercetin | Mitogen-acti     | 354  | 1176 | validate,RF_score":nul |       |
| MOL000098 | quercetin | Interleukin-1    | 4292 | h001 | validate,RF_score":nul |       |
| MOL000098 | quercetin | Pro-epiderm      | 734  | 1278 | validate,RF_score":nul |       |
| MOL000098 | quercetin | Retinoblastor    | 2915 | 3846 | validate,RF_score":nul |       |
| MOL000098 | quercetin | Tumor necro      | 265  | 777  | validate,RF_score":nul |       |
| MOL000098 | quercetin | Transcription    | 414  | 1629 | validate,RF_score":nul |       |
| MOL000098 | quercetin | Interleukin-6    | 351  | 1159 | validate,RF_score":nul |       |
| MOL000098 | quercetin | Cyclin-depen     | 4144 | h001 | validate,RF_score":nul |       |
| MOL000098 | quercetin | Activator of 9   | 4007 | h001 | validate,RF_score":nul |       |
| MOL000098 | quercetin | Caspase-3        | 4087 | h001 | validate,RF_score":nul |       |
| MOL000098 | quercetin | Cellular tumo    | 646  | 5788 | validate,RF_score":nul |       |
| MOL000098 | quercetin | ETS domain-      | 4194 | h001 | validate,RF_score":nul |       |
| MOL000098 | quercetin | NF-kappa-B       | 4394 | h001 | validate,RF_score":nul |       |
| MOL000098 | quercetin | NADPH--cyt       | 744  | 4120 | validate,RF_score":nul |       |
| MOL000098 | quercetin | Ornithine dec    | 153  | 449  | validate,RF_score":nul |       |
| MOL000098 | quercetin | Xanthine deh     | 568  | 3947 | validate,RF_score":nul |       |
| MOL000098 | quercetin | Caspase-8        | 4089 | h001 | validate,RF_score":nul |       |
| MOL000098 | quercetin | DNA topoiso      | 1293 | 3552 | validate,RF_score":nul |       |
| MOL000098 | quercetin | RAF proto-on     | 4491 | h001 | validate,RF_score":nul |       |
| MOL000098 | quercetin | Superoxide d     | 597  | 4152 | validate,RF_score":nul |       |
| MOL000098 | quercetin | Protein kinas    | 4469 | h001 | validate,RF_score":nul |       |
| MOL000098 | quercetin | Interstitial col | 353  | 1167 | validate,RF_score":nul |       |
| MOL000098 | quercetin | Hypoxia-indu     | 4263 | h001 | validate,RF_score":nul |       |
| MOL000098 | quercetin | Signal transd    | 4525 | h001 | validate,RF_score":nul |       |
| MOL000098 | quercetin | Protein CBFA     | 4464 | h001 | validate,RF_score":nul |       |
| MOL000098 | quercetin | Probable E3 u    | 4441 | h001 | validate,RF_score":nul |       |
| MOL000098 | quercetin | Cell division c  | 431  | 1771 | validate,RF_score":nul |       |
| MOL000098 | quercetin | 78 kDa gluco     | 2963 | 1847 | validate,RF_score":nul |       |
| MOL000098 | quercetin | Receptor tyrc    | 4496 | h001 | validate,RF_score":nul |       |

|           |           |                 |      |      |                        |
|-----------|-----------|-----------------|------|------|------------------------|
| MOL000098 | quercetin | Peroxisome p    | 4422 | h001 | validate,RF_score":nul |
| MOL000098 | quercetin | Acetyl-CoA c    | 231  | 690  | validate,RF_score":nul |
| MOL000098 | quercetin | Heme oxyger     | 2132 | 3391 | validate,RF_score":nul |
| MOL000098 | quercetin | Cytochrome      | 621  | 4512 | validate,RF_score":nul |
| MOL000098 | quercetin | Cytochrome      | 724  | 4200 | validate,RF_score":nul |
| MOL000098 | quercetin | Caveolin-1      | 4095 | h001 | validate,RF_score":nul |
| MOL000098 | quercetin | Myc proto-o     | 4372 | h001 | validate,RF_score":nul |
| MOL000098 | quercetin | Tissue factor   | 466  | 2139 | validate,RF_score":nul |
| MOL000098 | quercetin | Gap junction    | 436  | 1827 | validate,RF_score":nul |
| MOL000098 | quercetin | Cytochrome      | 4149 | h001 | validate,RF_score":nul |
| MOL000098 | quercetin | Intercellular a | 4287 | h001 | validate,RF_score":nul |
| MOL000098 | quercetin | Interleukin-1   | 418  | 1654 | validate,RF_score":nul |
| MOL000098 | quercetin | C-C motif ch    | 417  | 1649 | validate,RF_score":nul |
| MOL000098 | quercetin | E-selectin      | 427  | 1756 | validate,RF_score":nul |
| MOL000098 | quercetin | Vascular cell   | 440  | 1908 | validate,RF_score":nul |
| MOL000098 | quercetin | Prostaglandir   | 593  | 4131 | validate,RF_score":nul |
| MOL000098 | quercetin | Interleukin-8   | 4303 | h001 | validate,RF_score":nul |
| MOL000098 | quercetin | Protein kinas   | 4470 | h001 | validate,RF_score":nul |
| MOL000098 | quercetin | Baculoviral IA  | 4044 | h001 | validate,RF_score":nul |
| MOL000098 | quercetin | Dual oxidase    | 4174 | h001 | validate,RF_score":nul |
| MOL000098 | quercetin | Nitric oxide s  | 4395 | h001 | validate,RF_score":nul |
| MOL000098 | quercetin | Heat shock p    | 4247 | h001 | validate,RF_score":nul |
| MOL000098 | quercetin | Transforming    | 4568 | h001 | validate,RF_score":nul |
| MOL000098 | quercetin | Estrogen sulf   | 781  | 1275 | validate,RF_score":nul |
| MOL000098 | quercetin | Maltase-gluc    | 318  | 929  | validate,RF_score":nul |
| MOL000098 | quercetin | Interleukin-2   | 3978 | 1575 | validate,RF_score":nul |
| MOL000098 | quercetin | Nuclear recep   | 4403 | h001 | validate,RF_score":nul |
| MOL000098 | quercetin | Cytochrome      | 4150 | h001 | validate,RF_score":nul |
| MOL000098 | quercetin | G2/mitotic-s    | 4219 | h001 | validate,RF_score":nul |
| MOL000098 | quercetin | Tissue-type p   | 434  | 1792 | validate,RF_score":nul |
| MOL000098 | quercetin | Thrombomoc      | 457  | 2021 | validate,RF_score":nul |
| MOL000098 | quercetin | Plasminogen     | 4429 | h001 | validate,RF_score":nul |
| MOL000098 | quercetin | Collagen alph   | 731  | 28   | validate,RF_score":nul |
| MOL000098 | quercetin | Interferon ga   | 365  | 1253 | validate,RF_score":nul |
| MOL000098 | quercetin | Arachidonate    | 88   | 275  | validate,RF_score":nul |
| MOL000098 | quercetin | Phosphatidyl    | 4620 | h001 | validate,RF_score":nul |
| MOL000098 | quercetin | Interleukin-1   | 4297 | h001 | validate,RF_score":nul |
| MOL000098 | quercetin | Myeloperoxid    | 428  | 1757 | validate,RF_score":nul |
| MOL000098 | quercetin | DNA topoiso     | 4172 | h001 | validate,RF_score":nul |
| MOL000098 | quercetin | Neutrophil cy   | 4391 | h001 | validate,RF_score":nul |
| MOL000098 | quercetin | ATP-binding     | 4038 | h001 | validate,RF_score":nul |
| MOL000098 | quercetin | Hyaluronan s    | 4262 | h001 | validate,RF_score":nul |
| MOL000098 | quercetin | Glutathione S   | 733  | 904  | validate,RF_score":nul |
| MOL000098 | quercetin | Nuclear facto   | 4398 | h001 | validate,RF_score":nul |
| MOL000098 | quercetin | NAD(P)H deh     | 470  | 2157 | validate,RF_score":nul |
| MOL000098 | quercetin | Poly [ADP-rik   | 4435 | h001 | validate,RF_score":nul |
| MOL000098 | quercetin | Aryl hydrocar   | 3204 | 6220 | validate,RF_score":nul |
| MOL000098 | quercetin | 26S proteaso    | 3993 | h001 | validate,RF_score":nul |
| MOL000098 | quercetin | Solute carrier  | 4535 | h001 | validate,RF_score":nul |
| MOL000098 | quercetin | Collagen alph   | 2885 | 3853 | validate,RF_score":nul |
| MOL000098 | quercetin | DNA gyrase s    | 1366 | 4150 | validate,RF_score":nul |
| MOL000098 | quercetin | C-X-C motif     | 4137 | h001 | validate,RF_score":nul |
| MOL000098 | quercetin | C-X-C motif     | 4138 | h001 | validate,RF_score":nul |
| MOL000098 | quercetin | DDB1- and C     | 4159 | h001 | validate,RF_score":nul |

|           |                   |                           |      |      |                        |       |  |
|-----------|-------------------|---------------------------|------|------|------------------------|-------|--|
| MOL000098 | quercetin         | Nuclear receptor          | 4404 | h001 | validate,RF_score":nul |       |  |
| MOL000098 | quercetin         | Serine/threonine          | 4513 | h001 | validate,RF_score":nul |       |  |
| MOL000098 | quercetin         | Insulin receptor          | 11   | 36   | validate,RF_score":nul |       |  |
| MOL000098 | quercetin         | Claudin-4                 | 4125 | h001 | validate,RF_score":nul |       |  |
| MOL000098 | quercetin         | Peroxisome proliferator   | 4420 | h001 | validate,RF_score":nul |       |  |
| MOL000098 | quercetin         | Peroxisome proliferator   | 4421 | h001 | validate,RF_score":nul |       |  |
| MOL000098 | quercetin         | Heat shock factor         | 4246 | h001 | validate,RF_score":nul |       |  |
| MOL000098 | quercetin         | C-reactive protein        | 4130 | h001 | validate,RF_score":nul |       |  |
| MOL000098 | quercetin         | C-X-C motif               | 4136 | h001 | validate,RF_score":nul |       |  |
| MOL000098 | quercetin         | Inhibitor of nuclear      | 4270 | h001 | validate,RF_score":nul |       |  |
| MOL000098 | quercetin         | Osteopontin               | 4411 | h001 | validate,RF_score":nul |       |  |
| MOL000098 | quercetin         | Runt-related              | 4505 | h001 | validate,RF_score":nul |       |  |
| MOL000098 | quercetin         | Ras association           | 4492 | h001 | validate,RF_score":nul |       |  |
| MOL000098 | quercetin         | Transcription             | 4560 | h001 | validate,RF_score":nul |       |  |
| MOL000098 | quercetin         | Transcription             | 4561 | h001 | validate,RF_score":nul |       |  |
| MOL000098 | quercetin         | Prostatic acid            | 2998 | 1859 | validate,RF_score":nul |       |  |
| MOL000098 | quercetin         | Cathepsin D               | 363  | 1243 | validate,RF_score":nul |       |  |
| MOL000098 | quercetin         | Insulin-like growth       | 4276 | h001 | validate,RF_score":nul |       |  |
| MOL000098 | quercetin         | Insulin-like growth       | 4279 | h001 | validate,RF_score":nul |       |  |
| MOL000098 | quercetin         | CD40 ligand               | 4107 | h001 | validate,RF_score":nul |       |  |
| MOL000098 | quercetin         | Interferon receptor       | 4290 | h001 | validate,RF_score":nul |       |  |
| MOL000098 | quercetin         | Receptor tyrosine         | 4497 | h001 | validate,RF_score":nul |       |  |
| MOL000098 | quercetin         | Serum paraoxonase         | 357  | 1198 | validate,RF_score":nul |       |  |
| MOL000098 | quercetin         | Type I iodotyrosine       | 4589 | h001 | validate,RF_score":nul |       |  |
| MOL000098 | quercetin         | Procollagen C             | 4443 | h001 | validate,RF_score":nul |       |  |
| MOL000098 | quercetin         | Puromycin-sensitive       | 4484 | h001 | validate,RF_score":nul |       |  |
| MOL000098 | quercetin         | Hexokinase-2              | 4252 | h001 | validate,RF_score":nul |       |  |
| MOL000098 | quercetin         | Homeobox protein          | 4259 | h001 | validate,RF_score":nul |       |  |
| MOL000098 | quercetin         | Ras GTPase-activator      | 4493 | h001 | validate,RF_score":nul |       |  |
| MOL000098 | quercetin         | Peroxidase C              | 4418 | h001 | validate,RF_score":nul |       |  |
| MOL000098 | quercetin         | Glutathione S-transferase | 2952 | 896  | validate,RF_score":nul |       |  |
| MOL000098 | quercetin         | Glutathione S-transferase | 3688 | 2165 | validate,RF_score":nul |       |  |
| MOL001458 | coptisine         | Nitric oxide synthase     | 3    | 7    | 0.94263                | 0.742 |  |
| MOL001458 | coptisine         | Prostaglandin synthase    | 6    | 20   | 0.93007                | 0.706 |  |
| MOL001458 | coptisine         | Potassium voltage         | 37   | 101  | 0.91394                | 0.706 |  |
| MOL001458 | coptisine         | Estrogen receptor         | 46   | 136  | 0.96812                | 0.796 |  |
| MOL001458 | coptisine         | Androgen receptor         | 48   | 146  | 0.91983                | 0.736 |  |
| MOL001458 | coptisine         | Sodium channel            | 70   | 220  | 0.89722                | 0.712 |  |
| MOL001458 | coptisine         | Prostaglandin synthase    | 94   | 290  | 0.93216                | 0.758 |  |
| MOL001458 | coptisine         | Nitric-oxide synthase     | 95   | 291  | 0.84091                | 0.702 |  |
| MOL001458 | coptisine         | Trypsin-1                 | 2928 | 3176 | 0.82424                | 0.706 |  |
| MOL002668 | Worenine          | Nitric oxide synthase     | 3    | 7    | 0.94489                | 0.734 |  |
| MOL002668 | Worenine          | Prostaglandin synthase    | 6    | 20   | 0.92473                | 0.706 |  |
| MOL002668 | Worenine          | Estrogen receptor         | 46   | 136  | 0.96963                | 0.766 |  |
| MOL002668 | Worenine          | Androgen receptor         | 48   | 146  | 0.92562                | 0.748 |  |
| MOL002668 | Worenine          | Prostaglandin synthase    | 94   | 290  | 0.9258                 | 0.752 |  |
| MOL002668 | Worenine          | Serine/threonine          | 647  | 5790 | 0.94733                | 0.706 |  |
| MOL002668 | Worenine          | Proto-oncogene            | 2966 | 2347 | 0.95198                | 0.722 |  |
| MOL001918 | paeoniflorin      | Gamma-aminobutyric        | 309  | 872  | 0.85833                | 0.702 |  |
| MOL001919 | (3S,5R,8R,9R,13S) | Progesterone              | 209  | 614  | 0.88957                | 0.716 |  |
| MOL001919 | (3S,5R,8R,9R,13S) | Mineralocorticoid         | 252  | 737  | 0.91828                | 0.742 |  |
| MOL001924 | paeoniflorin      | Tumor necrosis factor     | 265  | 777  | validate,RF_score":nul |       |  |
| MOL001924 | paeoniflorin      | Interleukin-6             | 351  | 1159 | validate,RF_score":nul |       |  |
| MOL001924 | paeoniflorin      | Monocyte differentiation  | 4362 | h001 | validate,RF_score":nul |       |  |

|           |               |                |      |      |                        |         |       |
|-----------|---------------|----------------|------|------|------------------------|---------|-------|
| MOL001924 | paeoniflorin  | Lipopolysaccl  | 4322 | h001 | validate,RF_score":nul |         |       |
| MOL000211 | Mairin        | Progesterone   | 209  | 614  | 0.86523                | 0.702   |       |
| MOL000358 | beta-sitoster | Progesterone   | 209  | 614  | 0.90711                | 0.728   |       |
| MOL000358 | beta-sitoster | Nuclear recep  | 3276 | 6241 | 0.80097                | 0.71    |       |
| MOL000358 | beta-sitoster | Prostaglandir  | 6    | 20   | 0.90499                | 0.716   |       |
| MOL000358 | beta-sitoster | Prostaglandir  | 94   | 290  | 0.94352                | 0.814   |       |
| MOL000358 | beta-sitoster | Heat shock p   | 444  | 1939 | 0.96518                | 0.718   |       |
| MOL000358 | beta-sitoster | Phosphatidyl   | 491  | 2404 | 0.93315                | 0.732   |       |
| MOL000358 | beta-sitoster | Potassium vo   | 37   | 101  | 0.92578                | 0.722   |       |
| MOL000358 | beta-sitoster | mRNA of PKA    | 699  | 6263 | 0.86367                | 0.71    |       |
| MOL000358 | beta-sitoster | Dopamine D.    | 7    | 23   | 0.82032                | 0.712   |       |
| MOL000358 | beta-sitoster | Muscarinic ac  | 16   | 51   | 0.87818                | 0.756   |       |
| MOL000358 | beta-sitoster | Muscarinic ac  | 38   | 103  | 0.89323                | 0.746   |       |
| MOL000358 | beta-sitoster | Sodium chan    | 70   | 220  | 0.83117                | 0.718   |       |
| MOL000358 | beta-sitoster | Gamma-amir     | 141  | 423  | 0.80432                | 0.702   |       |
| MOL000358 | beta-sitoster | Muscarinic ac  | 154  | 450  | 0.88391                | 0.722   |       |
| MOL000358 | beta-sitoster | CGMP-inhibi    | 172  | 485  | 0.85236                | 0.7     |       |
| MOL000358 | beta-sitoster | 5-hydroxytry   | 175  | 502  | 0.8673                 | 0.704   |       |
| MOL000358 | beta-sitoster | Gamma-amir     | 181  | 523  | 0.81241                | 0.702   |       |
| MOL000358 | beta-sitoster | Alpha-1A ad    | 191  | 556  | 0.81084                | 0.704   |       |
| MOL000358 | beta-sitoster | Gamma-amir     | 200  | 580  | 0.8315                 | 0.702   |       |
| MOL000358 | beta-sitoster | Muscarinic ac  | 210  | 617  | 0.9101                 | 0.722   |       |
| MOL000358 | beta-sitoster | Alpha-1B ad    | 216  | 632  | 0.81069                | 0.742   |       |
| MOL000358 | beta-sitoster | Beta-2 adren   | 261  | 766  | 0.86521                | 0.712   |       |
| MOL000358 | beta-sitoster | Neuronal ace   | 284  | 813  | 0.83243                | 0.704   |       |
| MOL000358 | beta-sitoster | Sodium-depe    | 290  | 824  | 0.86918                | 0.704   |       |
| MOL000358 | beta-sitoster | Mu-type opic   | 299  | 847  | 0.81847                | 0.704   |       |
| MOL000358 | beta-sitoster | Gamma-amir     | 309  | 872  | 0.89464                | 0.76    |       |
| MOL000358 | beta-sitoster | Neuronal ace   | 581  | 4095 | 0.84572                | 0.734   |       |
| MOL000358 | beta-sitoster | Cytochrome     | 1143 | 2298 | 0.92549                | 0.794   |       |
| MOL000358 | beta-sitoster | Apoptosis reg  | 86   | 273  | validate,RF_score":nul |         |       |
| MOL000358 | beta-sitoster | Apoptosis reg  | 4033 | h001 | validate,RF_score":nul |         |       |
| MOL000358 | beta-sitoster | Caspase-9      | 4090 | h001 | validate,RF_score":nul |         |       |
| MOL000358 | beta-sitoster | Transcription  | 414  | 1629 | validate,RF_score":nul |         |       |
| MOL000358 | beta-sitoster | Caspase-3      | 4087 | h001 | validate,RF_score":nul |         |       |
| MOL000358 | beta-sitoster | Caspase-8      | 4089 | h001 | validate,RF_score":nul |         |       |
| MOL000358 | beta-sitoster | Protein kinas  | 4469 | h001 | validate,RF_score":nul |         |       |
| MOL000358 | beta-sitoster | Transforming   | 4568 | h001 | validate,RF_score":nul |         |       |
| MOL000358 | beta-sitoster | Serum parao    | 357  | 1198 | validate,RF_score":nul |         |       |
| MOL000358 | beta-sitoster | Microtubule-   | 3987 | 1852 | validate,RF_score":nul |         |       |
| MOL000359 | sitosterol    | Nuclear recep  | 3276 | 6241 | 0.80505                | 0.702   |       |
| MOL000359 | sitosterol    | Mineralocorti  | 252  | 737  | 0.93891                | 0.702   |       |
| MOL000422 | kaempferol    | Nitric oxide s | 3    | 7    | validate               | 0.85939 | 0.724 |
| MOL000422 | kaempferol    | Prostaglandir  | 6    | 20   | 0.90284                | 0.726   |       |
| MOL000422 | kaempferol    | Androgen rec   | 48   | 146  | 0.85714                | 0.772   |       |
| MOL000422 | kaempferol    | Peroxisome p   | 78   | 238  | 0.86424                | 0.712   |       |
| MOL000422 | kaempferol    | Prostaglandir  | 94   | 290  | validate               | 0.93928 | 0.818 |
| MOL000422 | kaempferol    | Heat shock p   | 444  | 1939 | 0.94634                | 0.728   |       |
| MOL000422 | kaempferol    | Phosphatidyl   | 491  | 2404 | 0.91788                | 0.712   |       |
| MOL000422 | kaempferol    | mRNA of PKA    | 699  | 6263 | 0.90354                | 0.708   |       |
| MOL000422 | kaempferol    | Nuclear recep  | 3276 | 6241 | 0.80207                | 0.802   |       |
| MOL000422 | kaempferol    | Dipeptidyl pe  | 332  | 952  | 0.85                   | 0.7     |       |
| MOL000422 | kaempferol    | Trypsin-1      | 2928 | 3176 | 0.88163                | 0.78    |       |
| MOL000422 | kaempferol    | Progesterone   | 209  | 614  | 0.90301                | 0.74    |       |

|           |              |                  |      |      |                        |       |
|-----------|--------------|------------------|------|------|------------------------|-------|
| MOL000422 | kaempferol   | Thrombin         | 17   | 54   | 0.92103                | 0.728 |
| MOL000422 | kaempferol   | Muscarinic ac    | 38   | 103  | 0.92317                | 0.708 |
| MOL000422 | kaempferol   | Nitric-oxide s   | 95   | 291  | 0.88006                | 0.726 |
| MOL000422 | kaempferol   | Gamma-amir       | 141  | 423  | 0.94935                | 0.704 |
| MOL000422 | kaempferol   | Acetylcholine    | 165  | 474  | 0.90302                | 0.754 |
| MOL000422 | kaempferol   | Sodium-depe      | 186  | 540  | 0.8692                 | 0.702 |
| MOL000422 | kaempferol   | Muscarinic ac    | 210  | 617  | 0.93949                | 0.71  |
| MOL000422 | kaempferol   | Alpha-1B adr     | 216  | 632  | 0.84985                | 0.722 |
| MOL000422 | kaempferol   | Gamma-amir       | 309  | 872  | 0.96205                | 0.728 |
| MOL000422 | kaempferol   | DNA topoiso      | 287  | 817  | 0.9037                 | 0.708 |
| MOL000422 | kaempferol   | Coagulation t    | 123  | 369  | 0.84297                | 0.7   |
| MOL000422 | kaempferol   | Calmodulin       | 3907 | 465  | 0.80593                | 0.724 |
| MOL000422 | kaempferol   | Transcription    | 4565 | h001 | validate,RF_score":nul |       |
| MOL000422 | kaempferol   | Inhibitor of n   | 4271 | h001 | validate,RF_score":nul |       |
| MOL000422 | kaempferol   | RAC-alpha se     | 4490 | h001 | validate,RF_score":nul |       |
| MOL000422 | kaempferol   | Apoptosis reg    | 86   | 273  | validate,RF_score":nul |       |
| MOL000422 | kaempferol   | Apoptosis reg    | 4033 | h001 | validate,RF_score":nul |       |
| MOL000422 | kaempferol   | Tumor necro      | 265  | 777  | validate,RF_score":nul |       |
| MOL000422 | kaempferol   | Transcription    | 414  | 1629 | validate,RF_score":nul |       |
| MOL000422 | kaempferol   | Activator of 9   | 4007 | h001 | validate,RF_score":nul |       |
| MOL000422 | kaempferol   | Caspase-3        | 4087 | h001 | validate,RF_score":nul |       |
| MOL000422 | kaempferol   | Mitogen-acti     | 704  | 6292 | validate,RF_score":nul |       |
| MOL000422 | kaempferol   | Xanthine deh     | 568  | 3947 | validate,RF_score":nul |       |
| MOL000422 | kaempferol   | Interstitial col | 353  | 1167 | validate,RF_score":nul |       |
| MOL000422 | kaempferol   | Signal transd    | 4525 | h001 | validate,RF_score":nul |       |
| MOL000422 | kaempferol   | Cell division c  | 431  | 1771 | validate,RF_score":nul |       |
| MOL000422 | kaempferol   | Peroxisome p     | 4422 | h001 | validate,RF_score":nul |       |
| MOL000422 | kaempferol   | Heme oxyger      | 2132 | 3391 | validate,RF_score":nul |       |
| MOL000422 | kaempferol   | Cytochrome       | 621  | 4512 | validate,RF_score":nul |       |
| MOL000422 | kaempferol   | Cytochrome       | 724  | 4200 | validate,RF_score":nul |       |
| MOL000422 | kaempferol   | Cytochrome       | 4149 | h001 | validate,RF_score":nul |       |
| MOL000422 | kaempferol   | Intercellular a  | 4287 | h001 | validate,RF_score":nul |       |
| MOL000422 | kaempferol   | E-selectin       | 427  | 1756 | validate,RF_score":nul |       |
| MOL000422 | kaempferol   | Vascular cell    | 440  | 1908 | validate,RF_score":nul |       |
| MOL000422 | kaempferol   | Nuclear recep    | 4403 | h001 | validate,RF_score":nul |       |
| MOL000422 | kaempferol   | Cytochrome       | 4150 | h001 | validate,RF_score":nul |       |
| MOL000422 | kaempferol   | Arachidonate     | 88   | 275  | validate,RF_score":nul |       |
| MOL000422 | kaempferol   | Hyaluronan s     | 4262 | h001 | validate,RF_score":nul |       |
| MOL000422 | kaempferol   | Glutathione S    | 733  | 904  | validate,RF_score":nul |       |
| MOL000422 | kaempferol   | Aryl hydrocar    | 3204 | 6220 | validate,RF_score":nul |       |
| MOL000422 | kaempferol   | 26S proteaso     | 3993 | h001 | validate,RF_score":nul |       |
| MOL000422 | kaempferol   | Solute carrier   | 4535 | h001 | validate,RF_score":nul |       |
| MOL000422 | kaempferol   | Nuclear recep    | 4404 | h001 | validate,RF_score":nul |       |
| MOL000422 | kaempferol   | Insulin recept   | 11   | 36   | validate,RF_score":nul |       |
| MOL000422 | kaempferol   | Type I iodoth    | 4589 | h001 | validate,RF_score":nul |       |
| MOL000422 | kaempferol   | Serine/threor    | 3971 | 6746 | validate,RF_score":nul |       |
| MOL000422 | kaempferol   | Peroxidase C     | 4418 | h001 | validate,RF_score":nul |       |
| MOL000422 | kaempferol   | Glutathione S    | 2952 | 896  | validate,RF_score":nul |       |
| MOL000422 | kaempferol   | Glutathione S    | 3688 | 2165 | validate,RF_score":nul |       |
| MOL000422 | kaempferol   | Aldo-keto re     | 222  | 650  | validate,RF_score":nul |       |
| MOL000422 | kaempferol   | Antileukopro     | 4028 | h001 | validate,RF_score":nul |       |
| MOL000492 | (+)-catechin | Prostaglandir    | 6    | 20   | 0.85881                | 0.742 |
| MOL000492 | (+)-catechin | Estrogen rece    | 46   | 136  | 0.95146                | 0.784 |
| MOL000492 | (+)-catechin | Prostaglandir    | 94   | 290  | 0.92912                | 0.82  |

|           |               |                 |      |      |                        |       |
|-----------|---------------|-----------------|------|------|------------------------|-------|
| MOL000492 | (+)-catechin  | Heat shock p    | 444  | 1939 | 0.96604                | 0.72  |
| MOL000492 | (+)-catechin  | Beta-lactama    | 499  | 2478 | 0.81396                | 0.712 |
| MOL000492 | (+)-catechin  | mRNA of PKA     | 699  | 6263 | 0.91286                | 0.702 |
| MOL000492 | (+)-catechin  | Nuclear recep   | 3276 | 6241 | 0.80977                | 0.812 |
| MOL000492 | (+)-catechin  | Calmodulin      | 3907 | 465  | 0.80009                | 0.7   |
| MOL000492 | (+)-catechin  | Retinoic acid   | 158  | 459  | 0.87969                | 0.702 |
| MOL000492 | (+)-catechin  | Catalase        | 735  | 2230 | validate,RF_score":nul |       |
| MOL000492 | (+)-catechin  | Hyaluronan s    | 4262 | h001 | validate,RF_score":nul |       |
| MOL001677 | asperglaucid  | Thrombin        | 17   | 54   | 0.9437                 | 0.778 |
| MOL001677 | asperglaucid  | Potassium vo    | 37   | 101  | 0.86573                | 0.712 |
| MOL001677 | asperglaucid  | Coagulation t   | 79   | 239  | 0.88729                | 0.74  |
| MOL001677 | asperglaucid  | Prostaglandir   | 94   | 290  | 0.85808                | 0.728 |
| MOL001677 | asperglaucid  | Trypsin-1       | 2928 | 3176 | 0.9129                 | 0.734 |
| MOL001944 | Marmesin      | Prostaglandir   | 6    | 20   | 0.84781                | 0.754 |
| MOL001944 | Marmesin      | Thrombin        | 17   | 54   | 0.82116                | 0.756 |
| MOL001944 | Marmesin      | Estrogen rece   | 46   | 136  | 0.88014                | 0.788 |
| MOL001944 | Marmesin      | Androgen rec    | 48   | 146  | 0.80197                | 0.784 |
| MOL001944 | Marmesin      | Prostaglandir   | 94   | 290  | 0.899                  | 0.822 |
| MOL001944 | Marmesin      | Beta-2 adren    | 261  | 766  | 0.82422                | 0.714 |
| MOL001944 | Marmesin      | Sodium-depe     | 290  | 824  | 0.82751                | 0.708 |
| MOL001944 | Marmesin      | Dipeptidyl pe   | 332  | 952  | 0.85131                | 0.718 |
| MOL001944 | Marmesin      | Cell division p | 482  | 2240 | 0.94376                | 0.734 |
| MOL001944 | Marmesin      | mRNA of PKA     | 699  | 6263 | 0.91823                | 0.706 |
| MOL001944 | Marmesin      | Muscarinic ac   | 38   | 103  | 0.80091                | 0.732 |
| MOL001944 | Marmesin      | Retinoic acid   | 158  | 459  | 0.83917                | 0.704 |
| MOL001944 | Marmesin      | Muscarinic ac   | 210  | 617  | 0.80543                | 0.704 |
| MOL001944 | Marmesin      | Beta-lactama    | 499  | 2478 | 0.88934                | 0.7   |
| MOL001944 | Marmesin      | Proto-oncog     | 2966 | 2347 | 0.80604                | 0.708 |
| MOL001944 | Marmesin      | mRNA of Pro     | 229  | 687  | 0.80598                | 0.714 |
| MOL001944 | Marmesin      | Phosphatidyl    | 491  | 2404 | 0.8634                 | 0.702 |
| MOL001944 | Marmesin      | Leukotriene A   | 521  | 3060 | 0.82881                | 0.7   |
| MOL001944 | Marmesin      | Heat shock p    | 444  | 1939 | 0.95309                | 0.7   |
| MOL001944 | Marmesin      | Serine/threor   | 647  | 5790 | 0.92036                | 0.71  |
| MOL004373 | Anhydroicarit | Nitric oxide s  | 3    | 7    | 0.93852                | 0.754 |
| MOL004373 | Anhydroicarit | Prostaglandir   | 6    | 20   | 0.91986                | 0.72  |
| MOL004373 | Anhydroicarit | Muscarinic ac   | 16   | 51   | 0.95252                | 0.718 |
| MOL004373 | Anhydroicarit | Thrombin        | 17   | 54   | 0.93874                | 0.758 |
| MOL004373 | Anhydroicarit | Potassium vo    | 37   | 101  | 0.9402                 | 0.718 |
| MOL004373 | Anhydroicarit | Muscarinic ac   | 38   | 103  | 0.95188                | 0.708 |
| MOL004373 | Anhydroicarit | Estrogen rece   | 46   | 136  | 0.97627                | 0.806 |
| MOL004373 | Anhydroicarit | Androgen rec    | 48   | 146  | 0.96175                | 0.786 |
| MOL004373 | Anhydroicarit | Sodium chan     | 70   | 220  | 0.96474                | 0.734 |
| MOL004373 | Anhydroicarit | Peroxisome p    | 78   | 238  | 0.95856                | 0.734 |
| MOL004373 | Anhydroicarit | Coagulation t   | 79   | 239  | 0.85123                | 0.712 |
| MOL004373 | Anhydroicarit | Muscarinic ac   | 87   | 274  | 0.95457                | 0.716 |
| MOL004373 | Anhydroicarit | Prostaglandir   | 94   | 290  | 0.93266                | 0.8   |
| MOL004373 | Anhydroicarit | Nitric-oxide s  | 95   | 291  | 0.84839                | 0.72  |
| MOL004373 | Anhydroicarit | Retinoic acid   | 158  | 459  | 0.9481                 | 0.728 |
| MOL004373 | Anhydroicarit | Acetylcholine   | 165  | 474  | 0.88495                | 0.736 |
| MOL004373 | Anhydroicarit | Alpha-1B adr    | 216  | 632  | 0.93038                | 0.726 |
| MOL004373 | Anhydroicarit | Beta-2 adren    | 261  | 766  | 0.96541                | 0.732 |
| MOL004373 | Anhydroicarit | Estrogen rece   | 307  | 869  | 0.96425                | 0.778 |
| MOL004373 | Anhydroicarit | Dipeptidyl pe   | 332  | 952  | 0.95962                | 0.724 |
| MOL004373 | Anhydroicarit | Mitogen-acti    | 402  | 1540 | 0.89802                | 0.71  |

|           |                               |      |      |         |       |
|-----------|-------------------------------|------|------|---------|-------|
| MOL004373 | Anhydroicarit Glycogen syn    | 422  | 1721 | 0.94151 | 0.718 |
| MOL004373 | Anhydroicarit Heat shock p    | 444  | 1939 | 0.95976 | 0.714 |
| MOL004373 | Anhydroicarit Cell division p | 482  | 2240 | 0.93679 | 0.708 |
| MOL004373 | Anhydroicarit Serine/threor   | 647  | 5790 | 0.93516 | 0.716 |
| MOL004373 | Anhydroicarit Retinoic acid   | 789  | 88   | 0.89201 | 0.706 |
| MOL004373 | Anhydroicarit Trypsin-1       | 2928 | 3176 | 0.93113 | 0.738 |
| MOL004373 | Anhydroicarit Proto-oncog     | 2966 | 2347 | 0.9201  | 0.71  |
| MOL004373 | Anhydroicarit Nuclear recep   | 3276 | 6241 | 0.83115 | 0.8   |
| MOL004373 | Anhydroicarit Calmodulin      | 3907 | 465  | 0.83659 | 0.78  |
| MOL004373 | Anhydroicarit Coagulation t   | 123  | 369  | 0.93366 | 0.704 |
| MOL004373 | Anhydroicarit Vascular endo   | 139  | 407  | 0.94027 | 0.714 |
| MOL004373 | Anhydroicarit DNA topoiso     | 287  | 817  | 0.89717 | 0.732 |
| MOL004373 | Anhydroicarit Cyclin-A2       | 3025 | 6235 | 0.97192 | 0.708 |
| MOL004373 | Anhydroicarit Nuclear recep   | 3279 | 6228 | 0.93099 | 0.714 |
| MOL004373 | Anhydroicarit Calcium-activ   | 3727 | 610  | 0.89381 | 0.712 |
| MOL004373 | Anhydroicarit Ig gamma-1      | 1201 | 4785 | 0.86419 | 0.704 |
| MOL004489 | Anemarsapor Glucocorticoi     | 308  | 871  | 0.92005 | 0.706 |
| MOL004497 | Hippeastrine Muscarinic ac    | 16   | 51   | 0.93591 | 0.73  |
| MOL004497 | Hippeastrine Muscarinic ac    | 38   | 103  | 0.9551  | 0.728 |
| MOL004497 | Hippeastrine Androgen rec     | 48   | 146  | 0.84435 | 0.816 |
| MOL004497 | Hippeastrine Sodium chan      | 70   | 220  | 0.91837 | 0.734 |
| MOL004497 | Hippeastrine Delta-type op    | 163  | 467  | 0.95308 | 0.742 |
| MOL004497 | Hippeastrine Alpha-1B adr     | 216  | 632  | 0.86237 | 0.71  |
| MOL004497 | Hippeastrine Mu-type opic     | 299  | 847  | 0.94578 | 0.722 |
| MOL004497 | Hippeastrine Gamma-amir       | 309  | 872  | 0.86532 | 0.714 |
| MOL004497 | Hippeastrine Heat shock p     | 444  | 1939 | 0.94835 | 0.726 |
| MOL004497 | Hippeastrine Phosphatidyl     | 491  | 2404 | 0.85884 | 0.708 |
| MOL004497 | Hippeastrine Neuronal ace     | 581  | 4095 | 0.85439 | 0.724 |
| MOL004514 | Timosaponin Progesterone      | 209  | 614  | 0.90524 | 0.716 |
| MOL004514 | Timosaponin Glucocorticoi     | 308  | 871  | 0.91964 | 0.71  |
| MOL000449 | Stigmasterol Progesterone     | 209  | 614  | 0.91372 | 0.722 |
| MOL000449 | Stigmasterol Mineralocorti    | 252  | 737  | 0.93992 | 0.704 |
| MOL000449 | Stigmasterol Nuclear recep    | 3276 | 6241 | 0.80043 | 0.724 |
| MOL000449 | Stigmasterol Alcohol dehy     | 727  | 517  | 0.91671 | 0.718 |
| MOL000449 | Stigmasterol Ig gamma-1       | 1201 | 4785 | 0.86527 | 0.716 |
| MOL000449 | Stigmasterol Retinoic acid    | 158  | 459  | 0.90832 | 0.702 |
| MOL000449 | Stigmasterol Nuclear recep    | 3279 | 6228 | 0.90386 | 0.738 |
| MOL000449 | Stigmasterol Prostaglandir    | 6    | 20   | 0.92622 | 0.788 |
| MOL000449 | Stigmasterol Prostaglandir    | 94   | 290  | 0.95207 | 0.844 |
| MOL000449 | Stigmasterol Alpha-2A ad      | 105  | 318  | 0.80929 | 0.718 |
| MOL000449 | Stigmasterol Sodium-depe      | 186  | 540  | 0.82914 | 0.708 |
| MOL000449 | Stigmasterol Sodium-depe      | 239  | 713  | 0.83641 | 0.734 |
| MOL000449 | Stigmasterol Beta-2 adren     | 261  | 766  | 0.8498  | 0.746 |
| MOL000449 | Stigmasterol Aldose reduc     | 288  | 822  | 0.91614 | 0.712 |
| MOL000449 | Stigmasterol Urokinase-ty     | 346  | 1074 | 0.88547 | 0.71  |
| MOL000449 | Stigmasterol Leukotriene A    | 521  | 3060 | 0.91672 | 0.734 |
| MOL000449 | Stigmasterol Amine oxidas     | 565  | 3939 | 0.95823 | 0.77  |
| MOL000449 | Stigmasterol Amine oxidas     | 566  | 3941 | 0.96149 | 0.72  |
| MOL000449 | Stigmasterol mRNA of PKA      | 699  | 6263 | 0.82526 | 0.722 |
| MOL000449 | Stigmasterol Chymotrypsin     | 1696 | 6011 | 0.82554 | 0.724 |
| MOL000449 | Stigmasterol Muscarinic ac    | 16   | 51   | 0.90926 | 0.752 |
| MOL000449 | Stigmasterol Muscarinic ac    | 38   | 103  | 0.91735 | 0.76  |
| MOL000449 | Stigmasterol Beta-1 adren     | 63   | 193  | 0.83313 | 0.72  |
| MOL000449 | Stigmasterol Sodium chan      | 70   | 220  | 0.82766 | 0.7   |

|           |              |                |      |      |                        |       |
|-----------|--------------|----------------|------|------|------------------------|-------|
| MOL000449 | Stigmasterol | 5-hydroxytry   | 175  | 502  | 0.85298                | 0.712 |
| MOL000449 | Stigmasterol | Alpha-1A ad    | 191  | 556  | 0.83855                | 0.738 |
| MOL000449 | Stigmasterol | Gamma-amir     | 200  | 580  | 0.80497                | 0.702 |
| MOL000449 | Stigmasterol | Muscarinic ac  | 210  | 617  | 0.91479                | 0.728 |
| MOL000449 | Stigmasterol | Alpha-1B adr   | 216  | 632  | 0.87389                | 0.752 |
| MOL000449 | Stigmasterol | Gamma-amir     | 309  | 872  | 0.87386                | 0.756 |
| MOL000449 | Stigmasterol | Neuronal ace   | 581  | 4095 | 0.81105                | 0.754 |
| MOL004528 | Icariin I    | DNA topoiso    | 287  | 817  | 0.87006                | 0.7   |
| MOL004540 | Anemarsapor  | Progesterone   | 209  | 614  | 0.88802                | 0.704 |
| MOL004540 | Anemarsapor  | Mineralocorti  | 252  | 737  | 0.93308                | 0.7   |
| MOL004540 | Anemarsapor  | Glucocorticoi  | 308  | 871  | 0.90849                | 0.716 |
| MOL000483 | (Z)-3-(4-hyd | Prostaglandir  | 6    | 20   | 0.82359                | 0.7   |
| MOL000483 | (Z)-3-(4-hyd | Prostaglandir  | 94   | 290  | 0.87633                | 0.79  |
| MOL000483 | (Z)-3-(4-hyd | CGMP-inhibi    | 172  | 485  | 0.82865                | 0.706 |
| MOL000483 | (Z)-3-(4-hyd | Alpha-1B adr   | 216  | 632  | 0.82086                | 0.71  |
| MOL000483 | (Z)-3-(4-hyd | Beta-2 adren   | 261  | 766  | 0.90684                | 0.718 |
| MOL000483 | (Z)-3-(4-hyd | Heat shock p   | 444  | 1939 | 0.88236                | 0.702 |
| MOL000483 | (Z)-3-(4-hyd | Leukotriene A  | 521  | 3060 | 0.83733                | 0.714 |
| MOL000483 | (Z)-3-(4-hyd | Calmodulin     | 3907 | 465  | 0.81466                | 0.73  |
| MOL000546 | diosgenin    | Progesterone   | 209  | 614  | 0.87375                | 0.706 |
| MOL000546 | diosgenin    | Mineralocorti  | 252  | 737  | 0.9302                 | 0.7   |
| MOL000546 | diosgenin    | Transcription  | 4565 | h001 | validate,RF_score":nul |       |
| MOL000546 | diosgenin    | RAC-alpha se   | 4490 | h001 | validate,RF_score":nul |       |
| MOL000546 | diosgenin    | Vascular endo  | 740  | 183  | validate,RF_score":nul |       |
| MOL000546 | diosgenin    | Cyclin-depen   | 4141 | h001 | validate,RF_score":nul |       |
| MOL000546 | diosgenin    | Cellular tumo  | 646  | 5788 | validate,RF_score":nul |       |
| MOL000546 | diosgenin    | Prostaglandir  | 94   | 290  | validate,RF_score":nul |       |
| MOL000546 | diosgenin    | Fatty acid syr | 374  | 1295 | validate,RF_score":nul |       |
| MOL000546 | diosgenin    | Superoxide d   | 597  | 4152 | validate,RF_score":nul |       |
| MOL000546 | diosgenin    | Catalase       | 735  | 2230 | validate,RF_score":nul |       |
| MOL000546 | diosgenin    | Hypoxia-indu   | 4263 | h001 | validate,RF_score":nul |       |
| MOL000546 | diosgenin    | Nuclear recep  | 4403 | h001 | validate,RF_score":nul |       |
| MOL000546 | diosgenin    | Cytosolic phc  | 246  | 723  | validate,RF_score":nul |       |
| MOL000546 | diosgenin    | Canalicular m  | 4079 | h001 | validate,RF_score":nul |       |
| MOL000546 | diosgenin    | Serine/threor  | 595  | 4148 | validate,RF_score":nul |       |
| MOL000631 | coumaroyltyr | Muscarinic ac  | 38   | 103  | 0.81359                | 0.702 |
| MOL000631 | coumaroyltyr | Beta-1 adren   | 63   | 193  | 0.80421                | 0.716 |
| MOL000631 | coumaroyltyr | Prostaglandir  | 94   | 290  | 0.84512                | 0.824 |
| MOL000631 | coumaroyltyr | Beta-2 adren   | 261  | 766  | 0.86776                | 0.738 |
| MOL000631 | coumaroyltyr | Heat shock p   | 444  | 1939 | 0.82613                | 0.718 |
| MOL000631 | coumaroyltyr | Leukotriene A  | 521  | 3060 | 0.82163                | 0.734 |
| MOL000631 | coumaroyltyr | Amine oxidas   | 565  | 3939 | 0.87613                | 0.71  |
| MOL000631 | coumaroyltyr | mRNA of PKA    | 699  | 6263 | 0.84451                | 0.708 |
| MOL000631 | coumaroyltyr | cAMP-depen     | 3586 | 6264 | 0.81527                | 0.776 |
| MOL000631 | coumaroyltyr | Prostaglandir  | 6    | 20   | 0.80989                | 0.744 |
| MOL005320 | arachidonate | Prostaglandir  | 6    | 20   | 0.87945                | 0.762 |
| MOL005320 | arachidonate | Prostaglandir  | 94   | 290  | 0.87014                | 0.804 |
| MOL005320 | arachidonate | Retinoic acid  | 267  | 780  | 0.94111                | 0.702 |
| MOL005320 | arachidonate | Nuclear recep  | 3276 | 6241 | 0.80898                | 0.746 |
| MOL005384 | suchilactone | Potassium vo   | 37   | 101  | 0.94156                | 0.728 |
| MOL005384 | suchilactone | Sodium chan    | 70   | 220  | 0.95775                | 0.7   |
| MOL005384 | suchilactone | Coagulation f  | 79   | 239  | 0.89329                | 0.756 |
| MOL005384 | suchilactone | Prostaglandir  | 94   | 290  | 0.92404                | 0.772 |
| MOL005384 | suchilactone | Coagulation f  | 123  | 369  | 0.90646                | 0.71  |

|           |                 |               |      |      |         |       |
|-----------|-----------------|---------------|------|------|---------|-------|
| MOL005384 | suchilactone    | mRNA of Pro   | 229  | 687  | 0.88329 | 0.738 |
| MOL005384 | suchilactone    | Beta-2 adren  | 261  | 766  | 0.95406 | 0.708 |
| MOL005384 | suchilactone    | Heat shock p  | 444  | 1939 | 0.94678 | 0.722 |
| MOL005384 | suchilactone    | Nuclear recep | 3279 | 6228 | 0.90508 | 0.71  |
| MOL005384 | suchilactone    | Calcium-activ | 3727 | 610  | 0.90036 | 0.7   |
| MOL005384 | suchilactone    | Calmodulin    | 3907 | 465  | 0.83665 | 0.784 |
| MOL005384 | suchilactone    | Prostaglandir | 6    | 20   | 0.90813 | 0.71  |
| MOL005384 | suchilactone    | Retinoic acid | 158  | 459  | 0.91069 | 0.71  |
| MOL005384 | suchilactone    | CGMP-inhibi   | 172  | 485  | 0.94072 | 0.708 |
| MOL005384 | suchilactone    | Alpha-1D ad   | 272  | 789  | 0.85211 | 0.7   |
| MOL005384 | suchilactone    | mRNA of PKA   | 699  | 6263 | 0.90171 | 0.7   |
| MOL007563 | Yangambin       | Potassium vo  | 37   | 101  | 0.96801 | 0.724 |
| MOL007563 | Yangambin       | Sodium chan   | 70   | 220  | 0.98165 | 0.718 |
| MOL007563 | Yangambin       | Coagulation t | 79   | 239  | 0.93946 | 0.726 |
| MOL007563 | Yangambin       | Prostaglandir | 94   | 290  | 0.8938  | 0.742 |
| MOL007563 | Yangambin       | DNA topoiso   | 287  | 817  | 0.89291 | 0.712 |
| MOL007563 | Yangambin       | Voltage-depe  | 3256 | 4111 | 0.94446 | 0.706 |
| MOL007563 | Yangambin       | Nuclear recep | 3276 | 6241 | 0.85232 | 0.756 |
| MOL007563 | Yangambin       | Calmodulin    | 3907 | 465  | 0.83339 | 0.722 |
| MOL007563 | Yangambin       | Calcium-activ | 3727 | 610  | 0.95454 | 0.706 |
| MOL008864 | [(7S,8R)-7-hy   | Prostaglandir | 94   | 290  | 0.8402  | 0.738 |
| MOL008871 | Marckine        | Prostaglandir | 94   | 290  | 0.84285 | 0.708 |
| MOL008871 | Marckine        | Calmodulin    | 3907 | 465  | 0.81928 | 0.702 |
| MOL002879 | Diop            | Sodium chan   | 70   | 220  | 0.82018 | 0.702 |
| MOL002879 | Diop            | Beta-2 adren  | 261  | 766  | 0.84063 | 0.704 |
| MOL002879 | Diop            | Muscarinic ac | 16   | 51   | 0.82102 | 0.716 |
| MOL002883 | Ethyl oleate (l | Nuclear recep | 3276 | 6241 | 0.81388 | 0.714 |
| MOL006147 | Alizarin-2-m    | Prostaglandir | 6    | 20   | 0.92505 | 0.794 |
| MOL006147 | Alizarin-2-m    | Estrogen rece | 46   | 136  | 0.96468 | 0.834 |
| MOL006147 | Alizarin-2-m    | Prostaglandir | 94   | 290  | 0.94188 | 0.84  |
| MOL006147 | Alizarin-2-m    | Retinoic acid | 158  | 459  | 0.91661 | 0.716 |
| MOL006147 | Alizarin-2-m    | CGMP-inhibi   | 172  | 485  | 0.87103 | 0.708 |
| MOL006147 | Alizarin-2-m    | Sodium-depe   | 290  | 824  | 0.83317 | 0.708 |
| MOL006147 | Alizarin-2-m    | Gamma-amir    | 309  | 872  | 0.85609 | 0.746 |
| MOL006147 | Alizarin-2-m    | Heat shock p  | 444  | 1939 | 0.94476 | 0.714 |
| MOL006147 | Alizarin-2-m    | Phosphatidyl  | 491  | 2404 | 0.91729 | 0.726 |
| MOL006147 | Alizarin-2-m    | Beta-lactama  | 499  | 2478 | 0.85345 | 0.704 |
| MOL006147 | Alizarin-2-m    | Neuronal ace  | 581  | 4095 | 0.81376 | 0.708 |
| MOL006147 | Alizarin-2-m    | mRNA of PKA   | 699  | 6263 | 0.93933 | 0.73  |
| MOL006147 | Alizarin-2-m    | Nuclear recep | 3276 | 6241 | 0.83638 | 0.824 |
| MOL006147 | Alizarin-2-m    | cAMP-depen    | 3586 | 6264 | 0.832   | 0.752 |
| MOL009495 | 2-hydroxy-1,    | Prostaglandir | 6    | 20   | 0.93756 | 0.746 |
| MOL009495 | 2-hydroxy-1,    | Potassium vo  | 37   | 101  | 0.91655 | 0.704 |
| MOL009495 | 2-hydroxy-1,    | Sodium chan   | 70   | 220  | 0.93904 | 0.72  |
| MOL009495 | 2-hydroxy-1,    | Coagulation t | 79   | 239  | 0.87851 | 0.73  |
| MOL009495 | 2-hydroxy-1,    | Prostaglandir | 94   | 290  | 0.94696 | 0.828 |
| MOL009495 | 2-hydroxy-1,    | Coagulation t | 123  | 369  | 0.91544 | 0.72  |
| MOL009495 | 2-hydroxy-1,    | Retinoic acid | 158  | 459  | 0.95475 | 0.722 |
| MOL009495 | 2-hydroxy-1,    | DNA topoiso   | 287  | 817  | 0.87133 | 0.704 |
| MOL009495 | 2-hydroxy-1,    | Heat shock p  | 444  | 1939 | 0.98022 | 0.716 |
| MOL009495 | 2-hydroxy-1,    | Phosphatidyl  | 491  | 2404 | 0.93597 | 0.704 |
| MOL009495 | 2-hydroxy-1,    | Nuclear recep | 3276 | 6241 | 0.84974 | 0.804 |
| MOL009495 | 2-hydroxy-1,    | Nuclear recep | 3279 | 6228 | 0.91038 | 0.7   |
| MOL009495 | 2-hydroxy-1,    | Calcium-activ | 3727 | 610  | 0.8521  | 0.704 |

|           |                                |      |      |         |       |
|-----------|--------------------------------|------|------|---------|-------|
| MOL009495 | 2-hydroxy-1, Calmodulin        | 3907 | 465  | 0.86867 | 0.742 |
| MOL009496 | 1,5,7-trihydroxy Prostaglandin | 6    | 20   | 0.85515 | 0.716 |
| MOL009496 | 1,5,7-trihydroxy Coagulation f | 79   | 239  | 0.81036 | 0.712 |
| MOL009496 | 1,5,7-trihydroxy Prostaglandin | 94   | 290  | 0.91353 | 0.812 |
| MOL009496 | 1,5,7-trihydroxy Coagulation f | 123  | 369  | 0.87383 | 0.722 |
| MOL009496 | 1,5,7-trihydroxy DNA topoiso   | 287  | 817  | 0.84825 | 0.718 |
| MOL009496 | 1,5,7-trihydroxy Heat shock p  | 444  | 1939 | 0.97457 | 0.718 |
| MOL009496 | 1,5,7-trihydroxy Ig gamma-1    | 1201 | 4785 | 0.81975 | 0.702 |
| MOL009496 | 1,5,7-trihydroxy Nuclear rece  | 3276 | 6241 | 0.8299  | 0.818 |
| MOL009496 | 1,5,7-trihydroxy Nuclear rece  | 3279 | 6228 | 0.88178 | 0.712 |
| MOL009496 | 1,5,7-trihydroxy Calmodulin    | 3907 | 465  | 0.85768 | 0.716 |
| MOL009500 | 1,6-dihydroxy Prostaglandin    | 6    | 20   | 0.91858 | 0.738 |
| MOL009500 | 1,6-dihydroxy Sodium chan      | 70   | 220  | 0.88194 | 0.728 |
| MOL009500 | 1,6-dihydroxy Coagulation f    | 79   | 239  | 0.83047 | 0.718 |
| MOL009500 | 1,6-dihydroxy Prostaglandin    | 94   | 290  | 0.94095 | 0.83  |
| MOL009500 | 1,6-dihydroxy Coagulation f    | 123  | 369  | 0.89524 | 0.7   |
| MOL009500 | 1,6-dihydroxy Retinoic acid    | 158  | 459  | 0.9442  | 0.71  |
| MOL009500 | 1,6-dihydroxy DNA topoiso      | 287  | 817  | 0.82448 | 0.708 |
| MOL009500 | 1,6-dihydroxy Heat shock p     | 444  | 1939 | 0.97792 | 0.722 |
| MOL009500 | 1,6-dihydroxy Phosphatidyl     | 491  | 2404 | 0.92246 | 0.706 |
| MOL009500 | 1,6-dihydroxy Nuclear rece     | 3276 | 6241 | 0.84903 | 0.81  |
| MOL009500 | 1,6-dihydroxy Nuclear rece     | 3279 | 6228 | 0.8926  | 0.718 |
| MOL009500 | 1,6-dihydroxy Calmodulin       | 3907 | 465  | 0.86127 | 0.724 |
| MOL009504 | 1-hydroxy-6 Prostaglandin      | 6    | 20   | 0.95805 | 0.76  |
| MOL009504 | 1-hydroxy-6 Prostaglandin      | 94   | 290  | 0.9635  | 0.832 |
| MOL009504 | 1-hydroxy-6 CGMP-inhibi        | 172  | 485  | 0.89878 | 0.704 |
| MOL009504 | 1-hydroxy-6 Beta-2 adren       | 261  | 766  | 0.88631 | 0.708 |
| MOL009504 | 1-hydroxy-6 Gamma-amir         | 309  | 872  | 0.84038 | 0.708 |
| MOL009504 | 1-hydroxy-6 Heat shock p       | 444  | 1939 | 0.96593 | 0.736 |
| MOL009504 | 1-hydroxy-6 Phosphatidyl       | 491  | 2404 | 0.93938 | 0.724 |
| MOL009504 | 1-hydroxy-6 Neuronal ace       | 581  | 4095 | 0.83386 | 0.7   |
| MOL009504 | 1-hydroxy-6 mRNA of PKA        | 699  | 6263 | 0.94867 | 0.724 |
| MOL009504 | 1-hydroxy-6 Ig gamma-1         | 1201 | 4785 | 0.84637 | 0.712 |
| MOL009504 | 1-hydroxy-6 Nuclear rece       | 3276 | 6241 | 0.85384 | 0.822 |
| MOL009504 | 1-hydroxy-6 cAMP-depen         | 3586 | 6264 | 0.84381 | 0.72  |
| MOL009513 | 2-hydroxy-1, Prostaglandin     | 6    | 20   | 0.93778 | 0.726 |
| MOL009513 | 2-hydroxy-1, Sodium chan       | 70   | 220  | 0.93279 | 0.72  |
| MOL009513 | 2-hydroxy-1, Coagulation f     | 79   | 239  | 0.86137 | 0.72  |
| MOL009513 | 2-hydroxy-1, Prostaglandin     | 94   | 290  | 0.94383 | 0.818 |
| MOL009513 | 2-hydroxy-1, Coagulation f     | 123  | 369  | 0.90677 | 0.71  |
| MOL009513 | 2-hydroxy-1, Retinoic acid     | 158  | 459  | 0.93778 | 0.722 |
| MOL009513 | 2-hydroxy-1, Heat shock p      | 444  | 1939 | 0.96636 | 0.716 |
| MOL009513 | 2-hydroxy-1, Phosphatidyl      | 491  | 2404 | 0.93884 | 0.71  |
| MOL009513 | 2-hydroxy-1, Nuclear rece      | 3276 | 6241 | 0.82189 | 0.79  |
| MOL009513 | 2-hydroxy-1, Calcium-activ     | 3727 | 610  | 0.85947 | 0.706 |
| MOL009513 | 2-hydroxy-1, Calmodulin        | 3907 | 465  | 0.84386 | 0.736 |
| MOL009519 | (2R,3S)-(+)-3 Prostaglandin    | 6    | 20   | 0.89971 | 0.73  |
| MOL009519 | (2R,3S)-(+)-3 Sodium chan      | 70   | 220  | 0.89435 | 0.716 |
| MOL009519 | (2R,3S)-(+)-3 Coagulation f    | 79   | 239  | 0.80065 | 0.724 |
| MOL009519 | (2R,3S)-(+)-3 Prostaglandin    | 94   | 290  | 0.93983 | 0.824 |
| MOL009519 | (2R,3S)-(+)-3 DNA topoiso      | 287  | 817  | 0.81278 | 0.704 |
| MOL009519 | (2R,3S)-(+)-3 Heat shock p     | 444  | 1939 | 0.97562 | 0.728 |
| MOL009519 | (2R,3S)-(+)-3 Phosphatidyl     | 491  | 2404 | 0.92803 | 0.708 |
| MOL009519 | (2R,3S)-(+)-3 Nuclear rece     | 3276 | 6241 | 0.81242 | 0.804 |

|           |                              |      |      |         |       |
|-----------|------------------------------|------|------|---------|-------|
| MOL009519 | (2R,3S)-(+)-3 Calmodulin     | 3907 | 465  | 0.86158 | 0.762 |
| MOL009524 | 3beta,20(R),5 Progesterone   | 209  | 614  | 0.90259 | 0.732 |
| MOL009525 | 3beta-24S(R) Progesterone    | 209  | 614  | 0.87542 | 0.71  |
| MOL009537 | americanin A Estrogen rece   | 46   | 136  | 0.94777 | 0.79  |
| MOL009537 | americanin A Sodium chan     | 70   | 220  | 0.83821 | 0.73  |
| MOL009537 | americanin A Prostaglandir   | 94   | 290  | 0.92048 | 0.8   |
| MOL009537 | americanin A Dipeptidyl pe   | 332  | 952  | 0.9168  | 0.722 |
| MOL009537 | americanin A Glycogen syn    | 422  | 1721 | 0.92348 | 0.74  |
| MOL009537 | americanin A Heat shock p    | 444  | 1939 | 0.94132 | 0.738 |
| MOL009537 | americanin A Cell division p | 482  | 2240 | 0.95549 | 0.74  |
| MOL009537 | americanin A mRNA of PKA     | 699  | 6263 | 0.90909 | 0.706 |
| MOL009537 | americanin A Trypsin-1       | 2928 | 3176 | 0.84968 | 0.746 |
| MOL009537 | americanin A Proto-oncog     | 2966 | 2347 | 0.8809  | 0.736 |
| MOL009537 | americanin A Cyclin-A2       | 3025 | 6235 | 0.95004 | 0.716 |
| MOL009551 | isoprincepin Acetylcholine   | 165  | 474  | 0.86911 | 0.71  |
| MOL009551 | isoprincepin Trypsin-1       | 2928 | 3176 | 0.94706 | 0.73  |
| MOL009562 | Ohioensin-A Prostaglandir    | 6    | 20   | 0.84841 | 0.704 |
| MOL009562 | Ohioensin-A Prostaglandir    | 94   | 290  | 0.84677 | 0.73  |
| MOL009562 | Ohioensin-A DNA topoiso      | 287  | 817  | 0.8387  | 0.708 |
| MOL000273 | (2R)-2-[(3S,5 Mineralocorti  | 252  | 737  | 0.94817 | 0.7   |
| MOL000273 | (2R)-2-[(3S,5 Nuclear rece   | 3276 | 6241 | 0.82078 | 0.7   |
| MOL000275 | trametenolic Mineralocorti   | 252  | 737  | 0.94787 | 0.704 |
| MOL000279 | Cerevisterol Mineralocorti   | 252  | 737  | 0.92974 | 0.706 |
| MOL000282 | ergosta-7,22 Progesterone    | 209  | 614  | 0.91728 | 0.736 |
| MOL000283 | Ergosterol pe Progesterone   | 209  | 614  | 0.82436 | 0.72  |
| MOL000296 | hederagenin Progesterone     | 209  | 614  | 0.92524 | 0.72  |
| MOL000296 | hederagenin Nuclear rece     | 3276 | 6241 | 0.82088 | 0.71  |
| MOL000296 | hederagenin Muscarinic ac    | 16   | 51   | 0.92733 | 0.738 |
| MOL000296 | hederagenin Muscarinic ac    | 38   | 103  | 0.9292  | 0.734 |
| MOL000296 | hederagenin Gamma-amir       | 141  | 423  | 0.96115 | 0.734 |
| MOL000296 | hederagenin Gamma-amir       | 200  | 580  | 0.93905 | 0.704 |
| MOL000296 | hederagenin Muscarinic ac    | 210  | 617  | 0.94317 | 0.738 |
| MOL000296 | hederagenin Alpha-1B adr     | 216  | 632  | 0.82574 | 0.708 |
| MOL000296 | hederagenin Gamma-amir       | 309  | 872  | 0.94976 | 0.756 |
| MOL000296 | hederagenin Glutamate re     | 3216 | 921  | 0.91616 | 0.714 |
| MOL000296 | hederagenin Gamma-amir       | 3284 | 841  | 0.92601 | 0.726 |
| MOL000296 | hederagenin Gamma-amir       | 181  | 523  | 0.95791 | 0.722 |
| MOL000296 | hederagenin Ig gamma-1       | 1201 | 4785 | 0.9493  | 0.724 |
| MOL000296 | hederagenin Alcohol dehy     | 726  | 444  | 0.90602 | 0.704 |
| MOL000296 | hederagenin Alcohol dehy     | 727  | 517  | 0.91739 | 0.736 |
| MOL000296 | hederagenin Lysozyme         | 1172 | 2300 | 0.82752 | 0.714 |
| MOL000296 | hederagenin Nicotinate-ni    | 2262 | 2264 | 0.8871  | 0.736 |
| MOL000296 | hederagenin Prostaglandir    | 6    | 20   | 0.87001 | 0.728 |
| MOL000296 | hederagenin Sodium chan      | 70   | 220  | 0.88289 | 0.714 |
| MOL000296 | hederagenin Prostaglandir    | 94   | 290  | 0.85997 | 0.764 |
| MOL000296 | hederagenin Retinoic acid    | 158  | 459  | 0.87522 | 0.724 |
| MOL000296 | hederagenin CGMP-inhibi      | 172  | 485  | 0.90901 | 0.71  |
| MOL000296 | hederagenin Sodium-depe      | 186  | 540  | 0.88894 | 0.72  |
| MOL000296 | hederagenin Cytochrome       | 1143 | 2298 | 0.9012  | 0.808 |
| MOL001510 | 24-epicampe Progesterone     | 209  | 614  | 0.91439 | 0.754 |
| MOL001510 | 24-epicampe Nuclear rece     | 3276 | 6241 | 0.80039 | 0.72  |
| MOL001645 | Linoleyl aceta Prostaglandir | 6    | 20   | 0.8676  | 0.746 |
| MOL001645 | Linoleyl aceta Prostaglandir | 94   | 290  | 0.85518 | 0.752 |
| MOL001645 | Linoleyl aceta Nuclear rece  | 3276 | 6241 | 0.84429 | 0.718 |

|           |                |                 |      |      |         |       |
|-----------|----------------|-----------------|------|------|---------|-------|
| MOL001645 | Linoleyl aceta | Retinoic acid   | 158  | 459  | 0.94114 | 0.708 |
| MOL001771 | poriferast-5-  | Progesterone    | 209  | 614  | 0.90131 | 0.73  |
| MOL001771 | poriferast-5-  | Nuclear recep   | 3276 | 6241 | 0.8021  | 0.702 |
| MOL001792 | DFV            | Prostaglandir   | 6    | 20   | 0.89248 | 0.752 |
| MOL001792 | DFV            | Estrogen rece   | 46   | 136  | 0.94247 | 0.804 |
| MOL001792 | DFV            | Prostaglandir   | 94   | 290  | 0.93054 | 0.84  |
| MOL001792 | DFV            | Retinoic acid   | 158  | 459  | 0.88276 | 0.704 |
| MOL001792 | DFV            | Beta-2 adren    | 261  | 766  | 0.83234 | 0.702 |
| MOL001792 | DFV            | Heat shock p    | 444  | 1939 | 0.94284 | 0.722 |
| MOL001792 | DFV            | Phosphatidyl    | 491  | 2404 | 0.88302 | 0.704 |
| MOL001792 | DFV            | mRNA of PKA     | 699  | 6263 | 0.89637 | 0.718 |
| MOL001792 | DFV            | Beta-lactama    | 499  | 2478 | 0.81673 | 0.704 |
| MOL001792 | DFV            | Amine oxidas    | 565  | 3939 | 0.86669 | 0.702 |
| MOL001792 | DFV            | Sodium-depe     | 290  | 824  | 0.83445 | 0.7   |
| MOL001792 | DFV            | cAMP-depen      | 3586 | 6264 | 0.8129  | 0.758 |
| MOL003044 | Chryseriol     | Nitric oxide s  | 3    | 7    | 0.89557 | 0.734 |
| MOL003044 | Chryseriol     | Prostaglandir   | 6    | 20   | 0.86524 | 0.714 |
| MOL003044 | Chryseriol     | Estrogen rece   | 46   | 136  | 0.96248 | 0.784 |
| MOL003044 | Chryseriol     | Androgen rec    | 48   | 146  | 0.90823 | 0.748 |
| MOL003044 | Chryseriol     | Peroxisome p    | 78   | 238  | 0.93298 | 0.718 |
| MOL003044 | Chryseriol     | Prostaglandir   | 94   | 290  | 0.93054 | 0.802 |
| MOL003044 | Chryseriol     | Dipeptidyl pe   | 332  | 952  | 0.89402 | 0.714 |
| MOL003044 | Chryseriol     | Mitogen-acti    | 402  | 1540 | 0.93973 | 0.74  |
| MOL003044 | Chryseriol     | Glycogen syn    | 422  | 1721 | 0.94303 | 0.714 |
| MOL003044 | Chryseriol     | Heat shock p    | 444  | 1939 | 0.96931 | 0.722 |
| MOL003044 | Chryseriol     | Cell division p | 482  | 2240 | 0.94966 | 0.732 |
| MOL003044 | Chryseriol     | Phosphatidyl    | 491  | 2404 | 0.91352 | 0.704 |
| MOL003044 | Chryseriol     | Serine/threor   | 647  | 5790 | 0.90815 | 0.7   |
| MOL003044 | Chryseriol     | mRNA of PKA     | 699  | 6263 | 0.93362 | 0.718 |
| MOL003044 | Chryseriol     | Trypsin-1       | 2928 | 3176 | 0.9036  | 0.76  |
| MOL003044 | Chryseriol     | Nuclear recep   | 3276 | 6241 | 0.83341 | 0.818 |
| MOL003044 | Chryseriol     | Nuclear recep   | 3279 | 6228 | 0.84785 | 0.708 |
| MOL003044 | Chryseriol     | Calmodulin      | 3907 | 465  | 0.84311 | 0.716 |
| MOL003542 | 8-Isopentenyl  | Thrombin        | 17   | 54   | 0.91253 | 0.738 |
| MOL003542 | 8-Isopentenyl  | Estrogen rece   | 46   | 136  | 0.96202 | 0.746 |
| MOL003542 | 8-Isopentenyl  | Androgen rec    | 48   | 146  | 0.89285 | 0.782 |
| MOL003542 | 8-Isopentenyl  | Peroxisome p    | 78   | 238  | 0.92197 | 0.716 |
| MOL003542 | 8-Isopentenyl  | Coagulation f   | 79   | 239  | 0.87106 | 0.716 |
| MOL003542 | 8-Isopentenyl  | Prostaglandir   | 94   | 290  | 0.93911 | 0.774 |
| MOL003542 | 8-Isopentenyl  | DNA topoiso     | 287  | 817  | 0.83621 | 0.714 |
| MOL003542 | 8-Isopentenyl  | Dipeptidyl pe   | 332  | 952  | 0.90387 | 0.718 |
| MOL003542 | 8-Isopentenyl  | Glycogen syn    | 422  | 1721 | 0.93438 | 0.716 |
| MOL003542 | 8-Isopentenyl  | Heat shock p    | 444  | 1939 | 0.96534 | 0.706 |
| MOL003542 | 8-Isopentenyl  | Cell division p | 482  | 2240 | 0.94471 | 0.706 |
| MOL003542 | 8-Isopentenyl  | Serine/threor   | 647  | 5790 | 0.93133 | 0.702 |
| MOL003542 | 8-Isopentenyl  | Trypsin-1       | 2928 | 3176 | 0.88213 | 0.728 |
| MOL003542 | 8-Isopentenyl  | Proto-oncog     | 2966 | 2347 | 0.90093 | 0.746 |
| MOL003542 | 8-Isopentenyl  | Calmodulin      | 3907 | 465  | 0.80764 | 0.712 |
| MOL003542 | 8-Isopentenyl  | Prostaglandir   | 6    | 20   | 0.93897 | 0.714 |
| MOL003542 | 8-Isopentenyl  | Sodium chan     | 70   | 220  | 0.88968 | 0.718 |
| MOL003542 | 8-Isopentenyl  | Coagulation f   | 123  | 369  | 0.90622 | 0.722 |
| MOL003542 | 8-Isopentenyl  | Vascular end    | 139  | 407  | 0.87496 | 0.704 |
| MOL003542 | 8-Isopentenyl  | Retinoic acid   | 158  | 459  | 0.91979 | 0.7   |
| MOL003542 | 8-Isopentenyl  | Mitogen-acti    | 402  | 1540 | 0.94402 | 0.728 |

|           |                                                  |      |      |         |       |
|-----------|--------------------------------------------------|------|------|---------|-------|
| MOL003542 | 8-Isopentenyl Cyclin-A2                          | 3025 | 6235 | 0.95114 | 0.708 |
| MOL003542 | 8-Isopentenyl Calcium-actin                      | 3727 | 610  | 0.80618 | 0.716 |
| MOL003542 | 8-Isopentenyl Nuclear receptor                   | 3276 | 6241 | 0.81359 | 0.792 |
| MOL003542 | 8-Isopentenyl Gamma-aminobutyrate                | 141  | 423  | 0.93176 | 0.7   |
| MOL003542 | 8-Isopentenyl Gamma-aminobutyrate                | 309  | 872  | 0.9023  | 0.752 |
| MOL003542 | 8-Isopentenyl Ferrichrome-oxidoreductase         | 1306 | 2427 | 0.94858 | 0.708 |
| MOL003542 | 8-Isopentenyl CGMP-inhibitor                     | 172  | 485  | 0.90774 | 0.702 |
| MOL003542 | 8-Isopentenyl Potassium voltage-gated channel    | 37   | 101  | 0.91247 | 0.708 |
| MOL003542 | 8-Isopentenyl Glycogen phosphorylase             | 350  | 1152 | 0.91868 | 0.7   |
| MOL004367 | olivil Prostaglandin synthase                    | 94   | 290  | 0.9178  | 0.766 |
| MOL004367 | olivil Heat shock protein                        | 444  | 1939 | 0.95685 | 0.714 |
| MOL004367 | olivil Nuclear receptor                          | 3276 | 6241 | 0.8234  | 0.768 |
| MOL004367 | olivil Calmodulin                                | 3907 | 465  | 0.85373 | 0.706 |
| MOL004380 | C-Homoerythrin Prostaglandin synthase            | 6    | 20   | 0.86965 | 0.728 |
| MOL004380 | C-Homoerythrin Dopamine D(1) receptor            | 7    | 23   | 0.9716  | 0.72  |
| MOL004380 | C-Homoerythrin Muscarinic acetylcholine receptor | 16   | 51   | 0.98402 | 0.772 |
| MOL004380 | C-Homoerythrin Potassium voltage-gated channel   | 37   | 101  | 0.89425 | 0.714 |
| MOL004380 | C-Homoerythrin Muscarinic acetylcholine receptor | 38   | 103  | 0.98656 | 0.76  |
| MOL004380 | C-Homoerythrin Androgen receptor                 | 48   | 146  | 0.91127 | 0.836 |
| MOL004380 | C-Homoerythrin D(1B) dopamine receptor           | 56   | 163  | 0.9618  | 0.718 |
| MOL004380 | C-Homoerythrin Beta-1 adrenergic receptor        | 63   | 193  | 0.8304  | 0.738 |
| MOL004380 | C-Homoerythrin Sodium channel                    | 70   | 220  | 0.98035 | 0.758 |
| MOL004380 | C-Homoerythrin Muscarinic acetylcholine receptor | 87   | 274  | 0.98024 | 0.75  |
| MOL004380 | C-Homoerythrin Prostaglandin synthase            | 94   | 290  | 0.87844 | 0.758 |
| MOL004380 | C-Homoerythrin Alpha-2A adrenergic receptor      | 105  | 318  | 0.93599 | 0.712 |
| MOL004380 | C-Homoerythrin 5-hydroxytryptamine receptor      | 106  | 320  | 0.96141 | 0.7   |
| MOL004380 | C-Homoerythrin 5-hydroxytryptamine receptor      | 113  | 341  | 0.96209 | 0.714 |
| MOL004380 | C-Homoerythrin Muscarinic acetylcholine receptor | 154  | 450  | 0.98569 | 0.744 |
| MOL004380 | C-Homoerythrin Delta-type opioid receptor        | 163  | 467  | 0.9872  | 0.766 |
| MOL004380 | C-Homoerythrin CGMP-inhibitor                    | 172  | 485  | 0.94161 | 0.708 |
| MOL004380 | C-Homoerythrin Histamine H1 receptor             | 173  | 492  | 0.97882 | 0.706 |
| MOL004380 | C-Homoerythrin 5-hydroxytryptamine receptor      | 175  | 502  | 0.9791  | 0.726 |
| MOL004380 | C-Homoerythrin Sodium-dependent transporter      | 186  | 540  | 0.98494 | 0.74  |
| MOL004380 | C-Homoerythrin Alpha-1A adrenergic receptor      | 191  | 556  | 0.97784 | 0.726 |
| MOL004380 | C-Homoerythrin Gamma-aminobutyrate               | 200  | 580  | 0.94184 | 0.706 |
| MOL004380 | C-Homoerythrin 5-hydroxytryptamine receptor      | 203  | 590  | 0.97002 | 0.724 |
| MOL004380 | C-Homoerythrin Muscarinic acetylcholine receptor | 210  | 617  | 0.99064 | 0.738 |
| MOL004380 | C-Homoerythrin Alpha-2B adrenergic receptor      | 214  | 629  | 0.96012 | 0.718 |
| MOL004380 | C-Homoerythrin Alpha-1B adrenergic receptor      | 216  | 632  | 0.96183 | 0.768 |
| MOL004380 | C-Homoerythrin Sodium-dependent transporter      | 239  | 713  | 0.98252 | 0.726 |
| MOL004380 | C-Homoerythrin Beta-2 adrenergic receptor        | 261  | 766  | 0.97264 | 0.732 |
| MOL004380 | C-Homoerythrin Alpha-1D adrenergic receptor      | 272  | 789  | 0.89722 | 0.75  |
| MOL004380 | C-Homoerythrin Neuronal acetylcholine receptor   | 284  | 813  | 0.96367 | 0.734 |
| MOL004380 | C-Homoerythrin Sodium-dependent transporter      | 290  | 824  | 0.98669 | 0.74  |
| MOL004380 | C-Homoerythrin D(2) dopamine receptor            | 292  | 831  | 0.98034 | 0.746 |
| MOL004380 | C-Homoerythrin Mu-type opioid receptor           | 299  | 847  | 0.98387 | 0.774 |
| MOL004380 | C-Homoerythrin Gamma-aminobutyrate               | 309  | 872  | 0.95407 | 0.754 |
| MOL004380 | C-Homoerythrin 5-hydroxytryptamine receptor      | 310  | 885  | 0.97144 | 0.716 |
| MOL004380 | C-Homoerythrin Neuronal acetylcholine receptor   | 581  | 4095 | 0.93822 | 0.73  |
| MOL004380 | C-Homoerythrin Gamma-aminobutyrate               | 3412 | 6088 | 0.89611 | 0.702 |
| MOL004380 | C-Homoerythrin Gamma-aminobutyrate               | 3967 | 6089 | 0.90287 | 0.702 |
| MOL004382 | Yinyanghuo / Estrogen receptor                   | 46   | 136  | 0.96544 | 0.724 |
| MOL004382 | Yinyanghuo / Androgen receptor                   | 48   | 146  | 0.90519 | 0.712 |
| MOL004382 | Yinyanghuo / Coagulation factor                  | 79   | 239  | 0.93761 | 0.7   |

|           |                                                         |      |      |         |       |
|-----------|---------------------------------------------------------|------|------|---------|-------|
| MOL004382 | Yinyanghuo / Prostaglandin                              | 94   | 290  | 0.92454 | 0.73  |
| MOL004382 | Yinyanghuo / DNA topoisomerase                          | 287  | 817  | 0.90364 | 0.702 |
| MOL004382 | Yinyanghuo / Trypsin-1                                  | 2928 | 3176 | 0.93661 | 0.716 |
| MOL004382 | Yinyanghuo / Proto-oncogene                             | 2966 | 2347 | 0.90784 | 0.724 |
| MOL004382 | Yinyanghuo / Nuclear receptor                           | 3276 | 6241 | 0.80358 | 0.758 |
| MOL004382 | Yinyanghuo / Calmodulin                                 | 3907 | 465  | 0.83627 | 0.732 |
| MOL004384 | Yinyanghuo (Nitric oxide synthase)                      | 3    | 7    | 0.92208 | 0.714 |
| MOL004384 | Yinyanghuo (Androgen receptor)                          | 48   | 146  | 0.93324 | 0.78  |
| MOL004384 | Yinyanghuo (Coagulation factor)                         | 79   | 239  | 0.86032 | 0.718 |
| MOL004384 | Yinyanghuo (Prostaglandin synthase)                     | 94   | 290  | 0.89992 | 0.788 |
| MOL004384 | Yinyanghuo (Acetylcholine esterase)                     | 165  | 474  | 0.85623 | 0.72  |
| MOL004384 | Yinyanghuo (Estrogen receptor)                          | 307  | 869  | 0.96761 | 0.744 |
| MOL004384 | Yinyanghuo (Dipeptidyl peptidase)                       | 332  | 952  | 0.87116 | 0.716 |
| MOL004384 | Yinyanghuo (Cell division protein)                      | 482  | 2240 | 0.96492 | 0.728 |
| MOL004384 | Yinyanghuo (Trypsin-1)                                  | 2928 | 3176 | 0.93937 | 0.738 |
| MOL004384 | Yinyanghuo (Nuclear receptor)                           | 3276 | 6241 | 0.83006 | 0.798 |
| MOL004384 | Yinyanghuo (Calmodulin)                                 | 3907 | 465  | 0.8607  | 0.756 |
| MOL004386 | Yinyanghuo (Nitric oxide synthase)                      | 3    | 7    | 0.91668 | 0.732 |
| MOL004386 | Yinyanghuo (Androgen receptor)                          | 48   | 146  | 0.92352 | 0.758 |
| MOL004386 | Yinyanghuo (Coagulation factor)                         | 79   | 239  | 0.87111 | 0.714 |
| MOL004386 | Yinyanghuo (Prostaglandin synthase)                     | 94   | 290  | 0.90055 | 0.772 |
| MOL004386 | Yinyanghuo (Acetylcholine esterase)                     | 165  | 474  | 0.84363 | 0.702 |
| MOL004386 | Yinyanghuo (DNA topoisomerase)                          | 287  | 817  | 0.86934 | 0.714 |
| MOL004386 | Yinyanghuo (Dipeptidyl peptidase)                       | 332  | 952  | 0.86147 | 0.716 |
| MOL004386 | Yinyanghuo (mRNA of PKA)                                | 699  | 6263 | 0.92747 | 0.7   |
| MOL004386 | Yinyanghuo (Trypsin-1)                                  | 2928 | 3176 | 0.93344 | 0.734 |
| MOL004386 | Yinyanghuo (Nuclear receptor)                           | 3276 | 6241 | 0.83097 | 0.792 |
| MOL004386 | Yinyanghuo (Calmodulin)                                 | 3907 | 465  | 0.85456 | 0.748 |
| MOL004388 | 6-hydroxy-1: Prostaglandin synthase                     | 6    | 20   | 0.9193  | 0.714 |
| MOL004388 | 6-hydroxy-1: Coagulation factor                         | 79   | 239  | 0.82257 | 0.706 |
| MOL004388 | 6-hydroxy-1: Prostaglandin synthase                     | 94   | 290  | 0.91208 | 0.78  |
| MOL004388 | 6-hydroxy-1: DNA topoisomerase                          | 287  | 817  | 0.84477 | 0.73  |
| MOL004388 | 6-hydroxy-1: Heat shock protein                         | 444  | 1939 | 0.95293 | 0.702 |
| MOL004388 | 6-hydroxy-1: Calcium-activated protein kinase           | 3727 | 610  | 0.85712 | 0.722 |
| MOL004391 | 8-(3-methyl)-Nitric oxide synthase                      | 3    | 7    | 0.91042 | 0.74  |
| MOL004391 | 8-(3-methyl)-Prostaglandin synthase                     | 6    | 20   | 0.94863 | 0.734 |
| MOL004391 | 8-(3-methyl)-Muscarinic acetylcholine receptor          | 16   | 51   | 0.90376 | 0.712 |
| MOL004391 | 8-(3-methyl)-Thrombin                                   | 17   | 54   | 0.9177  | 0.758 |
| MOL004391 | 8-(3-methyl)-Muscarinic acetylcholine receptor          | 38   | 103  | 0.9413  | 0.706 |
| MOL004391 | 8-(3-methyl)-Estrogen receptor                          | 46   | 136  | 0.95599 | 0.83  |
| MOL004391 | 8-(3-methyl)-Androgen receptor                          | 48   | 146  | 0.8939  | 0.772 |
| MOL004391 | 8-(3-methyl)-Beta-1 adrenergic receptor                 | 63   | 193  | 0.82175 | 0.722 |
| MOL004391 | 8-(3-methyl)-Sodium channel                             | 70   | 220  | 0.92121 | 0.742 |
| MOL004391 | 8-(3-methyl)-Peroxisome proliferator-activated receptor | 78   | 238  | 0.89088 | 0.71  |
| MOL004391 | 8-(3-methyl)-Prostaglandin synthase                     | 94   | 290  | 0.94987 | 0.814 |
| MOL004391 | 8-(3-methyl)-Nitric-oxide synthase                      | 95   | 291  | 0.82929 | 0.726 |
| MOL004391 | 8-(3-methyl)-Retinoic acid receptor                     | 158  | 459  | 0.92723 | 0.75  |
| MOL004391 | 8-(3-methyl)-Acetylcholine esterase                     | 165  | 474  | 0.83287 | 0.702 |
| MOL004391 | 8-(3-methyl)-cGMP-inhibitory protein                    | 172  | 485  | 0.92602 | 0.708 |
| MOL004391 | 8-(3-methyl)-Alpha-1B adrenergic receptor               | 216  | 632  | 0.85577 | 0.716 |
| MOL004391 | 8-(3-methyl)-Sodium-dependent protein kinase            | 239  | 713  | 0.88054 | 0.706 |
| MOL004391 | 8-(3-methyl)-Beta-2 adrenergic receptor                 | 261  | 766  | 0.92597 | 0.726 |
| MOL004391 | 8-(3-methyl)-Alpha-1D adrenergic receptor               | 272  | 789  | 0.81143 | 0.71  |
| MOL004391 | 8-(3-methyl)-Sodium-dependent protein kinase            | 290  | 824  | 0.90799 | 0.702 |

|           |               |                 |      |      |                        |         |       |
|-----------|---------------|-----------------|------|------|------------------------|---------|-------|
| MOL004391 | 8-(3-methyl   | Estrogen rece   | 307  | 869  |                        | 0.86542 | 0.736 |
| MOL004391 | 8-(3-methyl   | Gamma-amir      | 309  | 872  |                        | 0.8989  | 0.7   |
| MOL004391 | 8-(3-methyl   | Dipeptidyl pe   | 332  | 952  |                        | 0.91457 | 0.73  |
| MOL004391 | 8-(3-methyl   | Mitogen-acti    | 402  | 1540 |                        | 0.91656 | 0.736 |
| MOL004391 | 8-(3-methyl   | Glycogen syn    | 422  | 1721 |                        | 0.90973 | 0.706 |
| MOL004391 | 8-(3-methyl   | Heat shock p    | 444  | 1939 |                        | 0.93311 | 0.7   |
| MOL004391 | 8-(3-methyl   | Cell division p | 482  | 2240 |                        | 0.93398 | 0.712 |
| MOL004391 | 8-(3-methyl   | Serine/threor   | 647  | 5790 |                        | 0.93235 | 0.722 |
| MOL004391 | 8-(3-methyl   | Proto-oncog     | 2966 | 2347 |                        | 0.92167 | 0.738 |
| MOL004391 | 8-(3-methyl   | Cyclin-A2       | 3025 | 6235 |                        | 0.94974 | 0.702 |
| MOL004394 | Anhydroicarit | DNA topoiso     | 287  | 817  |                        | 0.86823 | 0.704 |
| MOL004396 | 1,2-bis(4-hyc | Estrogen rece   | 46   | 136  |                        | 0.96339 | 0.796 |
| MOL004396 | 1,2-bis(4-hyc | Sodium chan     | 70   | 220  |                        | 0.88802 | 0.706 |
| MOL004396 | 1,2-bis(4-hyc | Prostaglandir   | 94   | 290  |                        | 0.94131 | 0.778 |
| MOL004396 | 1,2-bis(4-hyc | Alpha-1B adr    | 216  | 632  |                        | 0.84192 | 0.708 |
| MOL004396 | 1,2-bis(4-hyc | Beta-2 adren    | 261  | 766  |                        | 0.93238 | 0.704 |
| MOL004396 | 1,2-bis(4-hyc | Heat shock p    | 444  | 1939 |                        | 0.96493 | 0.71  |
| MOL004396 | 1,2-bis(4-hyc | Cell division p | 482  | 2240 |                        | 0.92982 | 0.712 |
| MOL004396 | 1,2-bis(4-hyc | Proto-oncog     | 2966 | 2347 |                        | 0.87859 | 0.71  |
| MOL004396 | 1,2-bis(4-hyc | Cyclin-A2       | 3025 | 6235 |                        | 0.96359 | 0.702 |
| MOL004396 | 1,2-bis(4-hyc | Nuclear recep   | 3276 | 6241 |                        | 0.82698 | 0.78  |
| MOL004396 | 1,2-bis(4-hyc | Calmodulin      | 3907 | 465  |                        | 0.83568 | 0.704 |
| MOL004425 | Icariin       | DNA topoiso     | 287  | 817  |                        | 0.88236 | 0.7   |
| MOL004427 | Icariside A7  | Prostaglandir   | 94   | 290  |                        | 0.92157 | 0.704 |
| MOL004427 | Icariside A7  | DNA topoiso     | 287  | 817  |                        | 0.90656 | 0.708 |
| MOL004427 | Icariside A7  | Nuclear recep   | 3276 | 6241 |                        | 0.81641 | 0.7   |
| MOL000006 | luteolin      | Prostaglandir   | 6    | 20   |                        | 0.8371  | 0.712 |
| MOL000006 | luteolin      | Androgen rec    | 48   | 146  | validate               | 0.85596 | 0.752 |
| MOL000006 | luteolin      | Prostaglandir   | 94   | 290  | validate               | 0.92213 | 0.8   |
| MOL000006 | luteolin      | Heat shock p    | 444  | 1939 |                        | 0.96959 | 0.724 |
| MOL000006 | luteolin      | Trypsin-1       | 2928 | 3176 |                        | 0.88538 | 0.774 |
| MOL000006 | luteolin      | Nuclear recep   | 3276 | 6241 |                        | 0.83987 | 0.816 |
| MOL000006 | luteolin      | mRNA of PKA     | 699  | 6263 |                        | 0.92432 | 0.71  |
| MOL000006 | luteolin      | Dipeptidyl pe   | 332  | 952  |                        | 0.83499 | 0.708 |
| MOL000006 | luteolin      | Phosphatidyl    | 491  | 2404 |                        | 0.92629 | 0.7   |
| MOL000006 | luteolin      | Transcription   | 4565 | h001 | validate,RF_score":nul |         |       |
| MOL000006 | luteolin      | Epidermal gr    | 298  | 844  | validate,RF_score":nul |         |       |
| MOL000006 | luteolin      | RAC-alpha se    | 4490 | h001 | validate,RF_score":nul |         |       |
| MOL000006 | luteolin      | Vascular end    | 740  | 183  | validate,RF_score":nul |         |       |
| MOL000006 | luteolin      | G1/S-specific   | 4214 | h001 | validate,RF_score":nul |         |       |
| MOL000006 | luteolin      | Bcl-2-like pro  | 4054 | h001 | validate,RF_score":nul |         |       |
| MOL000006 | luteolin      | Cyclin-depen    | 4141 | h001 | validate,RF_score":nul |         |       |
| MOL000006 | luteolin      | Caspase-9       | 4090 | h001 | validate,RF_score":nul |         |       |
| MOL000006 | luteolin      | 72 kDa type I   | 238  | 707  | validate,RF_score":nul |         |       |
| MOL000006 | luteolin      | Matrix metall   | 4334 | h001 | validate,RF_score":nul |         |       |
| MOL000006 | luteolin      | Mitogen-acti    | 354  | 1176 | validate,RF_score":nul |         |       |
| MOL000006 | luteolin      | Interleukin-1   | 4292 | h001 | validate,RF_score":nul |         |       |
| MOL000006 | luteolin      | Retinoblastor   | 2915 | 3846 | validate,RF_score":nul |         |       |
| MOL000006 | luteolin      | Cell division p | 573  | 3959 | validate,RF_score":nul |         |       |
| MOL000006 | luteolin      | Tumor necro     | 265  | 777  | validate,RF_score":nul |         |       |
| MOL000006 | luteolin      | Transcription   | 414  | 1629 | validate,RF_score":nul |         |       |
| MOL000006 | luteolin      | Interleukin-6   | 351  | 1159 | validate,RF_score":nul |         |       |
| MOL000006 | luteolin      | Caspase-3       | 4087 | h001 | validate,RF_score":nul |         |       |
| MOL000006 | luteolin      | Cellular tumc   | 646  | 5788 | validate,RF_score":nul |         |       |

|           |               |                  |      |      |                        |       |  |
|-----------|---------------|------------------|------|------|------------------------|-------|--|
| MOL000006 | luteolin      | NF-kappa-B       | 4394 | h001 | validate,RF_score":nul |       |  |
| MOL000006 | luteolin      | Xanthine deh     | 568  | 3947 | validate,RF_score":nul |       |  |
| MOL000006 | luteolin      | DNA topoiso      | 1293 | 3552 | validate,RF_score":nul |       |  |
| MOL000006 | luteolin      | E3 ubiquitin-    | 4179 | h001 | validate,RF_score":nul |       |  |
| MOL000006 | luteolin      | Amyloid beta     | 648  | 5800 | validate,RF_score":nul |       |  |
| MOL000006 | luteolin      | Interstitial col | 353  | 1167 | validate,RF_score":nul |       |  |
| MOL000006 | luteolin      | Proliferating c  | 4450 | h001 | validate,RF_score":nul |       |  |
| MOL000006 | luteolin      | Receptor tyrc    | 4496 | h001 | validate,RF_score":nul |       |  |
| MOL000006 | luteolin      | Peroxisome p     | 4422 | h001 | validate,RF_score":nul |       |  |
| MOL000006 | luteolin      | Heme oxyger      | 2132 | 3391 | validate,RF_score":nul |       |  |
| MOL000006 | luteolin      | Caspase-7        | 3575 | 3320 | validate,RF_score":nul |       |  |
| MOL000006 | luteolin      | Intercellular a  | 4287 | h001 | validate,RF_score":nul |       |  |
| MOL000006 | luteolin      | Induced mye      | 4269 | h001 | validate,RF_score":nul |       |  |
| MOL000006 | luteolin      | Baculoviral IA   | 4044 | h001 | validate,RF_score":nul |       |  |
| MOL000006 | luteolin      | Interleukin-2    | 3978 | 1575 | validate,RF_score":nul |       |  |
| MOL000006 | luteolin      | G2/mitotic-sj    | 4219 | h001 | validate,RF_score":nul |       |  |
| MOL000006 | luteolin      | Tyrosinase       | 4590 | h001 | validate,RF_score":nul |       |  |
| MOL000006 | luteolin      | Interferon ga    | 365  | 1253 | validate,RF_score":nul |       |  |
| MOL000006 | luteolin      | Interleukin-4    | 4301 | h001 | validate,RF_score":nul |       |  |
| MOL000006 | luteolin      | DNA topoiso      | 4172 | h001 | validate,RF_score":nul |       |  |
| MOL000006 | luteolin      | Glutathione S    | 733  | 904  | validate,RF_score":nul |       |  |
| MOL000006 | luteolin      | Baculoviral IA   | 4043 | h001 | validate,RF_score":nul |       |  |
| MOL000006 | luteolin      | Solute carrier   | 4535 | h001 | validate,RF_score":nul |       |  |
| MOL000006 | luteolin      | Insulin recept   | 11   | 36   | validate,RF_score":nul |       |  |
| MOL000006 | luteolin      | CD40 ligand      | 4107 | h001 | validate,RF_score":nul |       |  |
| MOL000006 | luteolin      | Prostaglandir    | 4456 | h001 | validate,RF_score":nul |       |  |
| MOL000006 | luteolin      | Kinetochore p    | 4311 | h001 | validate,RF_score":nul |       |  |
| MOL000006 | luteolin      | Adenylate cy     | 4015 | h001 | validate,RF_score":nul |       |  |
| MOL000006 | luteolin      | Hepatocyte c     | 349  | 1144 | validate,RF_score":nul |       |  |
| MOL002641 | Phellavin_qt  | Prostaglandir    | 94   | 290  | 0.8662                 | 0.752 |  |
| MOL002641 | Phellavin_qt  | Coagulation f    | 123  | 369  | 0.87135                | 0.706 |  |
| MOL002641 | Phellavin_qt  | Heat shock p     | 444  | 1939 | 0.93974                | 0.702 |  |
| MOL002643 | delta 7-stigm | Progesterone     | 209  | 614  | 0.90779                | 0.72  |  |
| MOL002644 | Phellopterin  | Thrombin         | 17   | 54   | 0.88927                | 0.716 |  |
| MOL002644 | Phellopterin  | Muscarinic ac    | 38   | 103  | 0.87132                | 0.714 |  |
| MOL002644 | Phellopterin  | Sodium chan      | 70   | 220  | 0.8528                 | 0.708 |  |
| MOL002644 | Phellopterin  | Prostaglandir    | 94   | 290  | 0.86827                | 0.828 |  |
| MOL002644 | Phellopterin  | Retinoic acid    | 158  | 459  | 0.84254                | 0.73  |  |
| MOL002644 | Phellopterin  | Alpha-1B adr     | 216  | 632  | 0.80513                | 0.718 |  |
| MOL002644 | Phellopterin  | mRNA of Pro      | 229  | 687  | 0.85711                | 0.702 |  |
| MOL002644 | Phellopterin  | Beta-2 adren     | 261  | 766  | 0.89032                | 0.708 |  |
| MOL002644 | Phellopterin  | Gamma-amir       | 309  | 872  | 0.83693                | 0.7   |  |
| MOL002644 | Phellopterin  | Dipeptidyl pe    | 332  | 952  | 0.89601                | 0.732 |  |
| MOL002644 | Phellopterin  | Heat shock p     | 444  | 1939 | 0.94159                | 0.704 |  |
| MOL002644 | Phellopterin  | Neuronal ace     | 581  | 4095 | 0.82879                | 0.708 |  |
| MOL002651 | Dehydrotansl  | Dopamine D1      | 7    | 23   | 0.86658                | 0.71  |  |
| MOL002651 | Dehydrotansl  | Muscarinic ac    | 16   | 51   | 0.83224                | 0.716 |  |
| MOL002651 | Dehydrotansl  | Thrombin         | 17   | 54   | 0.90854                | 0.756 |  |
| MOL002651 | Dehydrotansl  | Muscarinic ac    | 38   | 103  | 0.86664                | 0.718 |  |
| MOL002651 | Dehydrotansl  | Estrogen rece    | 46   | 136  | 0.9482                 | 0.842 |  |
| MOL002651 | Dehydrotansl  | Androgen rec     | 48   | 146  | 0.90865                | 0.818 |  |
| MOL002651 | Dehydrotansl  | Sodium chan      | 70   | 220  | 0.8587                 | 0.716 |  |
| MOL002651 | Dehydrotansl  | Peroxisome p     | 78   | 238  | 0.93175                | 0.702 |  |
| MOL002651 | Dehydrotansl  | Muscarinic ac    | 87   | 274  | 0.8399                 | 0.726 |  |

|           |               |                |      |      |          |                |       |
|-----------|---------------|----------------|------|------|----------|----------------|-------|
| MOL002651 | Dehydrotansl  | Prostaglandir  | 94   | 290  |          | 0.87357        | 0.82  |
| MOL002651 | Dehydrotansl  | Muscarinic ac  | 154  | 450  |          | 0.86701        | 0.7   |
| MOL002651 | Dehydrotansl  | Delta-type o   | 163  | 467  |          | 0.93883        | 0.706 |
| MOL002651 | Dehydrotansl  | Acetylcholine  | 165  | 474  |          | 0.83578        | 0.75  |
| MOL002651 | Dehydrotansl  | 5-hydroxytry   | 175  | 502  |          | 0.872          | 0.702 |
| MOL002651 | Dehydrotansl  | Alpha-1A ad    | 191  | 556  |          | 0.82371        | 0.71  |
| MOL002651 | Dehydrotansl  | Beta-2 adren   | 261  | 766  |          | 0.86815        | 0.716 |
| MOL002651 | Dehydrotansl  | Mu-type opic   | 299  | 847  |          | 0.9106         | 0.724 |
| MOL002651 | Dehydrotansl  | Gamma-amir     | 309  | 872  |          | 0.82406        | 0.716 |
| MOL002651 | Dehydrotansl  | Dipeptidyl pe  | 332  | 952  |          | 0.87881        | 0.758 |
| MOL002651 | Dehydrotansl  | Neuronal ace   | 581  | 4095 |          | 0.8481         | 0.718 |
| MOL002651 | Dehydrotansl  | Nuclear recep  | 3279 | 6228 |          | 0.84032        | 0.716 |
| MOL002662 | rutaecarpine  | Prostaglandir  | 6    | 20   |          | 0.96074        | 0.742 |
| MOL002662 | rutaecarpine  | Androgen rec   | 48   | 146  |          | 0.89653        | 0.754 |
| MOL002662 | rutaecarpine  | Sodium chan    | 70   | 220  |          | 0.86166        | 0.716 |
| MOL002662 | rutaecarpine  | Coagulation t  | 79   | 239  |          | 0.81889        | 0.712 |
| MOL002662 | rutaecarpine  | Prostaglandir  | 94   | 290  | validate | 0.94976        | 0.818 |
| MOL002662 | rutaecarpine  | Nitric-oxide s | 95   | 291  |          | 0.87932        | 0.706 |
| MOL002662 | rutaecarpine  | 5-hydroxytry   | 113  | 341  |          | 0.95474        | 0.724 |
| MOL002662 | rutaecarpine  | Retinoic acid  | 158  | 459  |          | 0.91309        | 0.734 |
| MOL002662 | rutaecarpine  | Phosphatidyl   | 491  | 2404 |          | 0.94991        | 0.718 |
| MOL002662 | rutaecarpine  | Serine/threor  | 647  | 5790 |          | 0.95752        | 0.722 |
| MOL002662 | rutaecarpine  | mRNA of PKA    | 699  | 6263 |          | 0.92493        | 0.722 |
| MOL002662 | rutaecarpine  | 72 kDa type I  | 238  | 707  | validate | ,RF_score":nul |       |
| MOL002662 | rutaecarpine  | Matrix metall  | 4334 | h001 | validate | ,RF_score":nul |       |
| MOL002662 | rutaecarpine  | Tumor necro    | 265  | 777  | validate | ,RF_score":nul |       |
| MOL002662 | rutaecarpine  | Cytochrome     | 621  | 4512 | validate | ,RF_score":nul |       |
| MOL002662 | rutaecarpine  | Cytochrome     | 724  | 4200 | validate | ,RF_score":nul |       |
| MOL002662 | rutaecarpine  | Interleukin-4  | 4301 | h001 | validate | ,RF_score":nul |       |
| MOL002662 | rutaecarpine  | Cytochrome     | 670  | 6030 | validate | ,RF_score":nul |       |
| MOL002663 | Skimmianin    | Retinoic acid  | 158  | 459  |          | 0.81549        | 0.722 |
| MOL002663 | Skimmianin    | Gamma-amir     | 309  | 872  |          | 0.80101        | 0.712 |
| MOL002663 | Skimmianin    | Heat shock p   | 444  | 1939 |          | 0.8643         | 0.72  |
| MOL002663 | Skimmianin    | mRNA of PKA    | 699  | 6263 |          | 0.81199        | 0.722 |
| MOL002663 | Skimmianin    | Phosphatidyl   | 491  | 2404 |          | 0.82304        | 0.7   |
| MOL002666 | Chelerythrine | Prostaglandir  | 6    | 20   |          | 0.89245        | 0.712 |
| MOL002666 | Chelerythrine | Potassium vo   | 37   | 101  |          | 0.91195        | 0.7   |
| MOL002666 | Chelerythrine | Prostaglandir  | 94   | 290  |          | 0.89532        | 0.786 |
| MOL002666 | Chelerythrine | Retinoic acid  | 158  | 459  |          | 0.93705        | 0.718 |
| MOL002666 | Chelerythrine | mRNA of PKA    | 699  | 6263 |          | 0.90647        | 0.716 |
| MOL002666 | Chelerythrine | Nuclear recep  | 3276 | 6241 |          | 0.81417        | 0.734 |
| MOL002670 | Cavidine      | Prostaglandir  | 6    | 20   |          | 0.88184        | 0.726 |
| MOL002670 | Cavidine      | Muscarinic ac  | 16   | 51   |          | 0.98225        | 0.746 |
| MOL002670 | Cavidine      | Potassium vo   | 37   | 101  |          | 0.95184        | 0.702 |
| MOL002670 | Cavidine      | Muscarinic ac  | 38   | 103  |          | 0.98532        | 0.744 |
| MOL002670 | Cavidine      | Beta-1 adren   | 63   | 193  |          | 0.85004        | 0.708 |
| MOL002670 | Cavidine      | Sodium chan    | 70   | 220  |          | 0.98028        | 0.734 |
| MOL002670 | Cavidine      | Coagulation t  | 79   | 239  |          | 0.83378        | 0.718 |
| MOL002670 | Cavidine      | Muscarinic ac  | 87   | 274  |          | 0.98355        | 0.744 |
| MOL002670 | Cavidine      | Prostaglandir  | 94   | 290  |          | 0.8887         | 0.802 |
| MOL002670 | Cavidine      | 5-hydroxytry   | 113  | 341  |          | 0.97018        | 0.712 |
| MOL002670 | Cavidine      | Alpha-2C ad    | 126  | 378  |          | 0.93366        | 0.706 |
| MOL002670 | Cavidine      | Muscarinic ac  | 154  | 450  |          | 0.9784         | 0.73  |
| MOL002670 | Cavidine      | Retinoic acid  | 158  | 459  |          | 0.94019        | 0.718 |

|           |               |               |      |      |         |       |
|-----------|---------------|---------------|------|------|---------|-------|
| MOL002670 | Cavidine      | Delta-type of | 163  | 467  | 0.98777 | 0.738 |
| MOL002670 | Cavidine      | 5-hydroxytry  | 175  | 502  | 0.97906 | 0.702 |
| MOL002670 | Cavidine      | 5-hydroxytry  | 203  | 590  | 0.96718 | 0.71  |
| MOL002670 | Cavidine      | Alpha-1B ad   | 216  | 632  | 0.97008 | 0.734 |
| MOL002670 | Cavidine      | Beta-2 adren  | 261  | 766  | 0.97232 | 0.73  |
| MOL002670 | Cavidine      | Alpha-1D ad   | 272  | 789  | 0.95218 | 0.748 |
| MOL002670 | Cavidine      | DNA topoiso   | 287  | 817  | 0.84799 | 0.7   |
| MOL002670 | Cavidine      | Mu-type opi   | 299  | 847  | 0.98026 | 0.722 |
| MOL002670 | Cavidine      | Heat shock p  | 444  | 1939 | 0.9599  | 0.736 |
| MOL002670 | Cavidine      | Retinoic acid | 789  | 88   | 0.90434 | 0.7   |
| MOL002670 | Cavidine      | Calmodulin    | 3907 | 465  | 0.82973 | 0.762 |
| MOL002670 | Cavidine      | Dopamine D    | 7    | 23   | 0.98118 | 0.704 |
| MOL002670 | Cavidine      | Sodium-depe   | 290  | 824  | 0.98066 | 0.702 |
| MOL002670 | Cavidine      | Coagulation t | 123  | 369  | 0.89654 | 0.7   |
| MOL002670 | Cavidine      | cAMP and cA   | 3868 | 695  | 0.93619 | 0.7   |
| MOL002672 | Hericenone F  | Thrombin      | 17   | 54   | 0.93069 | 0.724 |
| MOL000787 | Fumarine      | Prostaglandir | 6    | 20   | 0.8818  | 0.746 |
| MOL000787 | Fumarine      | Muscarinic ac | 16   | 51   | 0.96297 | 0.722 |
| MOL000787 | Fumarine      | Potassium vo  | 37   | 101  | 0.93336 | 0.728 |
| MOL000787 | Fumarine      | Muscarinic ac | 38   | 103  | 0.97334 | 0.734 |
| MOL000787 | Fumarine      | Sodium chan   | 70   | 220  | 0.97092 | 0.75  |
| MOL000787 | Fumarine      | Coagulation t | 79   | 239  | 0.85687 | 0.742 |
| MOL000787 | Fumarine      | Muscarinic ac | 87   | 274  | 0.96943 | 0.706 |
| MOL000787 | Fumarine      | Prostaglandir | 94   | 290  | 0.87384 | 0.8   |
| MOL000787 | Fumarine      | 5-hydroxytry  | 113  | 341  | 0.96706 | 0.712 |
| MOL000787 | Fumarine      | Coagulation t | 123  | 369  | 0.89541 | 0.714 |
| MOL000787 | Fumarine      | Muscarinic ac | 154  | 450  | 0.96132 | 0.712 |
| MOL000787 | Fumarine      | Delta-type of | 163  | 467  | 0.97804 | 0.742 |
| MOL000787 | Fumarine      | 5-hydroxytry  | 175  | 502  | 0.96348 | 0.702 |
| MOL000787 | Fumarine      | Alpha-1B ad   | 216  | 632  | 0.94762 | 0.734 |
| MOL000787 | Fumarine      | Beta-2 adren  | 261  | 766  | 0.96246 | 0.704 |
| MOL000787 | Fumarine      | Alpha-1D ad   | 272  | 789  | 0.91417 | 0.732 |
| MOL000787 | Fumarine      | Mu-type opi   | 299  | 847  | 0.96836 | 0.72  |
| MOL000787 | Fumarine      | Heat shock p  | 444  | 1939 | 0.95557 | 0.748 |
| MOL000787 | Fumarine      | mRNA of PKA   | 699  | 6263 | 0.85062 | 0.72  |
| MOL000787 | Fumarine      | Calmodulin    | 3907 | 465  | 0.82397 | 0.768 |
| MOL000787 | Fumarine      | Sodium-depe   | 290  | 824  | 0.96309 | 0.704 |
| MOL000787 | Fumarine      | Voltage-depe  | 3256 | 4111 | 0.94528 | 0.7   |
| MOL000787 | Fumarine      | CGMP-inhibi   | 172  | 485  | 0.93303 | 0.704 |
| MOL000787 | Fumarine      | Sodium-depe   | 239  | 713  | 0.95044 | 0.7   |
| MOL000787 | Fumarine      | Type IV phos  | 489  | 2358 | 0.93587 | 0.7   |
| MOL000787 | Fumarine      | DNA topoiso   | 287  | 817  | 0.80063 | 0.704 |
| MOL000787 | Fumarine      | Dopamine D    | 7    | 23   | 0.9561  | 0.7   |
| MOL000787 | Fumarine      | Vascular end  | 139  | 407  | 0.89061 | 0.7   |
| MOL000790 | Isocorypalmir | Prostaglandir | 6    | 20   | 0.84031 | 0.728 |
| MOL000790 | Isocorypalmir | Dopamine D    | 7    | 23   | 0.97877 | 0.72  |
| MOL000790 | Isocorypalmir | Muscarinic ac | 16   | 51   | 0.97607 | 0.752 |
| MOL000790 | Isocorypalmir | Potassium vo  | 37   | 101  | 0.94805 | 0.732 |
| MOL000790 | Isocorypalmir | Muscarinic ac | 38   | 103  | 0.98149 | 0.75  |
| MOL000790 | Isocorypalmir | D(1B) dopam   | 56   | 163  | 0.94355 | 0.71  |
| MOL000790 | Isocorypalmir | Sodium chan   | 70   | 220  | 0.97577 | 0.764 |
| MOL000790 | Isocorypalmir | Coagulation t | 79   | 239  | 0.86156 | 0.704 |
| MOL000790 | Isocorypalmir | Muscarinic ac | 87   | 274  | 0.98021 | 0.74  |
| MOL000790 | Isocorypalmir | Prostaglandir | 94   | 290  | 0.87343 | 0.8   |

|           |                             |      |      |         |       |
|-----------|-----------------------------|------|------|---------|-------|
| MOL000790 | Isocorypalmir 5-hydroxytry  | 113  | 341  | 0.96475 | 0.702 |
| MOL000790 | Isocorypalmir Carbonic anhy | 117  | 357  | 0.82949 | 0.778 |
| MOL000790 | Isocorypalmir Alpha-2C adre | 126  | 378  | 0.94437 | 0.702 |
| MOL000790 | Isocorypalmir Muscarinic ac | 154  | 450  | 0.97855 | 0.748 |
| MOL000790 | Isocorypalmir Retinoic acid | 158  | 459  | 0.93452 | 0.718 |
| MOL000790 | Isocorypalmir Delta-type op | 163  | 467  | 0.98789 | 0.742 |
| MOL000790 | Isocorypalmir 5-hydroxytry  | 175  | 502  | 0.98219 | 0.714 |
| MOL000790 | Isocorypalmir Sodium-depe   | 186  | 540  | 0.97076 | 0.702 |
| MOL000790 | Isocorypalmir Alpha-1A ad   | 191  | 556  | 0.98517 | 0.706 |
| MOL000790 | Isocorypalmir 5-hydroxytry  | 203  | 590  | 0.97006 | 0.728 |
| MOL000790 | Isocorypalmir Muscarinic ac | 210  | 617  | 0.98457 | 0.722 |
| MOL000790 | Isocorypalmir Alpha-2B ad   | 214  | 629  | 0.95647 | 0.702 |
| MOL000790 | Isocorypalmir Alpha-1B ad   | 216  | 632  | 0.97306 | 0.754 |
| MOL000790 | Isocorypalmir D(3) dopamir  | 218  | 638  | 0.98848 | 0.706 |
| MOL000790 | Isocorypalmir Sodium-depe   | 239  | 713  | 0.97265 | 0.724 |
| MOL000790 | Isocorypalmir Beta-2 adren  | 261  | 766  | 0.9766  | 0.752 |
| MOL000790 | Isocorypalmir Alpha-1D ad   | 272  | 789  | 0.95968 | 0.73  |
| MOL000790 | Isocorypalmir Sodium-depe   | 290  | 824  | 0.97792 | 0.72  |
| MOL000790 | Isocorypalmir Mu-type opic  | 299  | 847  | 0.97605 | 0.738 |
| MOL000790 | Isocorypalmir Heat shock p  | 444  | 1939 | 0.9705  | 0.72  |
| MOL000790 | Isocorypalmir mRNA of PKA   | 699  | 6263 | 0.80968 | 0.704 |
| MOL000790 | Isocorypalmir Retinoic acid | 789  | 88   | 0.9261  | 0.716 |
| MOL000790 | Isocorypalmir Ig gamma-1    | 1201 | 4785 | 0.8725  | 0.7   |
| MOL000790 | Isocorypalmir Nuclear recep | 3279 | 6228 | 0.85827 | 0.708 |
| MOL000790 | Isocorypalmir Calmodulin    | 3907 | 465  | 0.86075 | 0.77  |
| MOL000790 | Isocorypalmir Calcium-activ | 3727 | 610  | 0.91646 | 0.7   |
| MOL001131 | phellamurin_Estrogen recep  | 46   | 136  | 0.97143 | 0.798 |
| MOL001131 | phellamurin_Coagulation f   | 79   | 239  | 0.86636 | 0.726 |
| MOL001131 | phellamurin_Prostaglandir   | 94   | 290  | 0.94976 | 0.784 |
| MOL001131 | phellamurin_Coagulation f   | 123  | 369  | 0.91192 | 0.714 |
| MOL001131 | phellamurin_CGMP-inhibi     | 172  | 485  | 0.91211 | 0.71  |
| MOL001131 | phellamurin_DNA topoiso     | 287  | 817  | 0.86027 | 0.716 |
| MOL001131 | phellamurin_Heat shock p    | 444  | 1939 | 0.97571 | 0.714 |
| MOL001131 | phellamurin_Nuclear recep   | 3276 | 6241 | 0.81254 | 0.806 |
| MOL001131 | phellamurin_Calmodulin      | 3907 | 465  | 0.82852 | 0.752 |
| MOL001131 | phellamurin_Glucocorticoi   | 308  | 871  | 0.94014 | 0.72  |
| MOL001455 | (S)-Canadine Prostaglandir  | 6    | 20   | 0.83803 | 0.724 |
| MOL001455 | (S)-Canadine Dopamine D1    | 7    | 23   | 0.97929 | 0.708 |
| MOL001455 | (S)-Canadine Muscarinic ac  | 16   | 51   | 0.97597 | 0.75  |
| MOL001455 | (S)-Canadine Potassium vo   | 37   | 101  | 0.9519  | 0.726 |
| MOL001455 | (S)-Canadine Muscarinic ac  | 38   | 103  | 0.98326 | 0.746 |
| MOL001455 | (S)-Canadine Sodium chan    | 70   | 220  | 0.97618 | 0.75  |
| MOL001455 | (S)-Canadine Coagulation f  | 79   | 239  | 0.83084 | 0.732 |
| MOL001455 | (S)-Canadine Muscarinic ac  | 87   | 274  | 0.98037 | 0.742 |
| MOL001455 | (S)-Canadine Prostaglandir  | 94   | 290  | 0.86589 | 0.788 |
| MOL001455 | (S)-Canadine 5-hydroxytry   | 113  | 341  | 0.96978 | 0.714 |
| MOL001455 | (S)-Canadine Coagulation f  | 123  | 369  | 0.88718 | 0.7   |
| MOL001455 | (S)-Canadine Alpha-2C ad    | 126  | 378  | 0.93876 | 0.706 |
| MOL001455 | (S)-Canadine Muscarinic ac  | 154  | 450  | 0.97557 | 0.74  |
| MOL001455 | (S)-Canadine Retinoic acid  | 158  | 459  | 0.92954 | 0.7   |
| MOL001455 | (S)-Canadine Delta-type op  | 163  | 467  | 0.98646 | 0.746 |
| MOL001455 | (S)-Canadine 5-hydroxytry   | 175  | 502  | 0.97897 | 0.716 |
| MOL001455 | (S)-Canadine Alpha-1A ad    | 191  | 556  | 0.98324 | 0.702 |
| MOL001455 | (S)-Canadine 5-hydroxytry   | 203  | 590  | 0.96984 | 0.722 |

|           |                |                |      |      |         |       |
|-----------|----------------|----------------|------|------|---------|-------|
| MOL001455 | (S)-Canadine   | Muscarinic ac  | 210  | 617  | 0.98307 | 0.706 |
| MOL001455 | (S)-Canadine   | Alpha-2B ad    | 214  | 629  | 0.95697 | 0.708 |
| MOL001455 | (S)-Canadine   | Alpha-1B ad    | 216  | 632  | 0.97254 | 0.746 |
| MOL001455 | (S)-Canadine   | D(3) dopamir   | 218  | 638  | 0.98707 | 0.7   |
| MOL001455 | (S)-Canadine   | Sodium-depe    | 239  | 713  | 0.96849 | 0.704 |
| MOL001455 | (S)-Canadine   | Beta-2 adren   | 261  | 766  | 0.97214 | 0.742 |
| MOL001455 | (S)-Canadine   | Alpha-1D ad    | 272  | 789  | 0.95642 | 0.754 |
| MOL001455 | (S)-Canadine   | Sodium-depe    | 290  | 824  | 0.97561 | 0.716 |
| MOL001455 | (S)-Canadine   | Mu-type opic   | 299  | 847  | 0.97476 | 0.72  |
| MOL001455 | (S)-Canadine   | Heat shock p   | 444  | 1939 | 0.95177 | 0.73  |
| MOL001455 | (S)-Canadine   | mRNA of PKA    | 699  | 6263 | 0.81035 | 0.712 |
| MOL001455 | (S)-Canadine   | Calmodulin     | 3907 | 465  | 0.83755 | 0.774 |
| MOL001455 | (S)-Canadine   | D(1B) dopam    | 56   | 163  | 0.94702 | 0.7   |
| MOL001455 | (S)-Canadine   | Retinoic acid  | 789  | 88   | 0.90971 | 0.702 |
| MOL002331 | N-Methylflin   | Nitric oxide s | 3    | 7    | 0.85277 | 0.742 |
| MOL002331 | N-Methylflin   | Prostaglandir  | 6    | 20   | 0.88509 | 0.79  |
| MOL002331 | N-Methylflin   | Dopamine D     | 7    | 23   | 0.83166 | 0.706 |
| MOL002331 | N-Methylflin   | Muscarinic ac  | 16   | 51   | 0.91112 | 0.746 |
| MOL002331 | N-Methylflin   | Muscarinic ac  | 38   | 103  | 0.93917 | 0.74  |
| MOL002331 | N-Methylflin   | Sodium chan    | 70   | 220  | 0.86808 | 0.746 |
| MOL002331 | N-Methylflin   | Muscarinic ac  | 87   | 274  | 0.83493 | 0.72  |
| MOL002331 | N-Methylflin   | Prostaglandir  | 94   | 290  | 0.88869 | 0.826 |
| MOL002331 | N-Methylflin   | Nitric-oxide s | 95   | 291  | 0.83811 | 0.758 |
| MOL002331 | N-Methylflin   | Muscarinic ac  | 154  | 450  | 0.87587 | 0.718 |
| MOL002331 | N-Methylflin   | Retinoic acid  | 158  | 459  | 0.89302 | 0.748 |
| MOL002331 | N-Methylflin   | CGMP-inhibi    | 172  | 485  | 0.91773 | 0.736 |
| MOL002331 | N-Methylflin   | Sodium-depe    | 186  | 540  | 0.87086 | 0.702 |
| MOL002331 | N-Methylflin   | Muscarinic ac  | 210  | 617  | 0.92008 | 0.708 |
| MOL002331 | N-Methylflin   | Alpha-1B ad    | 216  | 632  | 0.84023 | 0.728 |
| MOL002331 | N-Methylflin   | Sodium-depe    | 239  | 713  | 0.83347 | 0.712 |
| MOL002331 | N-Methylflin   | Beta-2 adren   | 261  | 766  | 0.90101 | 0.71  |
| MOL002331 | N-Methylflin   | Sodium-depe    | 290  | 824  | 0.88653 | 0.736 |
| MOL002331 | N-Methylflin   | Gamma-amir     | 309  | 872  | 0.89696 | 0.742 |
| MOL002331 | N-Methylflin   | Heat shock p   | 444  | 1939 | 0.93209 | 0.73  |
| MOL002331 | N-Methylflin   | Neuronal ace   | 581  | 4095 | 0.81693 | 0.722 |
| MOL002331 | N-Methylflin   | Alpha-1A ad    | 191  | 556  | 0.80425 | 0.7   |
| MOL005438 | campesterol    | Progesterone   | 209  | 614  | 0.89517 | 0.742 |
| MOL006422 | thalifendine   | Nitric oxide s | 3    | 7    | 0.94312 | 0.758 |
| MOL006422 | thalifendine   | Prostaglandir  | 6    | 20   | 0.93228 | 0.726 |
| MOL006422 | thalifendine   | Potassium vo   | 37   | 101  | 0.91085 | 0.716 |
| MOL006422 | thalifendine   | Estrogen rece  | 46   | 136  | 0.97259 | 0.8   |
| MOL006422 | thalifendine   | Androgen rec   | 48   | 146  | 0.92636 | 0.756 |
| MOL006422 | thalifendine   | Sodium chan    | 70   | 220  | 0.88619 | 0.71  |
| MOL006422 | thalifendine   | Prostaglandir  | 94   | 290  | 0.93993 | 0.786 |
| MOL006422 | thalifendine   | Nitric-oxide s | 95   | 291  | 0.84005 | 0.714 |
| MOL006422 | thalifendine   | Retinoic acid  | 158  | 459  | 0.94942 | 0.714 |
| MOL006422 | thalifendine   | mRNA of PKA    | 699  | 6263 | 0.93189 | 0.7   |
| MOL006422 | thalifendine   | Trypsin-1      | 2928 | 3176 | 0.8615  | 0.724 |
| MOL006422 | thalifendine   | Nuclear recep  | 3276 | 6241 | 0.82046 | 0.748 |
| MOL006422 | thalifendine   | Calmodulin     | 3907 | 465  | 0.80199 | 0.74  |
| MOL006422 | thalifendine   | Heat shock p   | 444  | 1939 | 0.95859 | 0.706 |
| MOL001323 | Sitosterol alp | Progesterone   | 209  | 614  | 0.9092  | 0.7   |
| MOL001323 | Sitosterol alp | Prostaglandir  | 94   | 290  | 0.84409 | 0.704 |
| MOL001323 | Sitosterol alp | Gamma-amir     | 309  | 872  | 0.96001 | 0.708 |

|           |                |               |      |      |         |       |
|-----------|----------------|---------------|------|------|---------|-------|
| MOL001323 | Sitosterol alp | Alcohol dehy  | 727  | 517  | 0.80974 | 0.728 |
| MOL001323 | Sitosterol alp | Cytochrome    | 1143 | 2298 | 0.87499 | 0.71  |
| MOL001323 | Sitosterol alp | Mineralocorti | 252  | 737  | 0.94    | 0.704 |
| MOL003578 | Cycloartenol   | Mineralocorti | 252  | 737  | 0.90341 | 0.7   |
| MOL001494 | Mandenol       | Prostaglandir | 6    | 20   | 0.83532 | 0.732 |
| MOL001494 | Mandenol       | Prostaglandir | 94   | 290  | 0.8032  | 0.732 |
| MOL001494 | Mandenol       | Nuclear recep | 3276 | 6241 | 0.8041  | 0.716 |
| MOL001495 | Ethyl linolena | Prostaglandir | 6    | 20   | 0.8139  | 0.75  |
| MOL001495 | Ethyl linolena | Nuclear recep | 3276 | 6241 | 0.81228 | 0.732 |
| MOL001979 | LAN            | Progesterone  | 209  | 614  | 0.91314 | 0.732 |
| MOL001979 | LAN            | Mineralocorti | 252  | 737  | 0.94408 | 0.702 |
| MOL001979 | LAN            | Nuclear recep | 3276 | 6241 | 0.85742 | 0.704 |
| MOL005406 | atropine       | Dopamine D1   | 7    | 23   | 0.80403 | 0.716 |
| MOL005406 | atropine       | Muscarinic ac | 16   | 51   | 0.87684 | 0.766 |
| MOL005406 | atropine       | Muscarinic ac | 38   | 103  | 0.93936 | 0.77  |
| MOL005406 | atropine       | Beta-1 adren  | 63   | 193  | 0.82537 | 0.74  |
| MOL005406 | atropine       | Muscarinic ac | 87   | 274  | 0.84153 | 0.728 |
| MOL005406 | atropine       | Alpha-2A ad   | 105  | 318  | 0.86529 | 0.732 |
| MOL005406 | atropine       | Alpha-2C ad   | 126  | 378  | 0.83243 | 0.748 |
| MOL005406 | atropine       | Muscarinic ac | 154  | 450  | 0.92044 | 0.724 |
| MOL005406 | atropine       | Delta-type op | 163  | 467  | 0.93306 | 0.744 |
| MOL005406 | atropine       | 5-hydroxytry  | 175  | 502  | 0.85725 | 0.718 |
| MOL005406 | atropine       | Sodium-depe   | 186  | 540  | 0.94105 | 0.744 |
| MOL005406 | atropine       | Alpha-1A ad   | 191  | 556  | 0.86931 | 0.728 |
| MOL005406 | atropine       | 5-hydroxytry  | 203  | 590  | 0.87893 | 0.722 |
| MOL005406 | atropine       | Muscarinic ac | 210  | 617  | 0.96158 | 0.724 |
| MOL005406 | atropine       | Alpha-2B ad   | 214  | 629  | 0.91882 | 0.742 |
| MOL005406 | atropine       | Alpha-1B ad   | 216  | 632  | 0.86331 | 0.78  |
| MOL005406 | atropine       | Sodium-depe   | 239  | 713  | 0.92072 | 0.738 |
| MOL005406 | atropine       | Beta-2 adren  | 261  | 766  | 0.89432 | 0.75  |
| MOL005406 | atropine       | Sodium-depe   | 290  | 824  | 0.93928 | 0.736 |
| MOL005406 | atropine       | D(2) dopamir  | 292  | 831  | 0.86826 | 0.742 |
| MOL005406 | atropine       | Mu-type opic  | 299  | 847  | 0.80863 | 0.73  |
| MOL005406 | atropine       | Gamma-amir    | 309  | 872  | 0.8019  | 0.728 |
| MOL005406 | atropine       | 5-hydroxytry  | 310  | 885  | 0.82961 | 0.702 |
| MOL005406 | atropine       | Histamine H1  | 173  | 492  | 0.84973 | 0.7   |
| MOL005406 | atropine       | 5-hydroxytry  | 106  | 320  | 0.86993 | 0.704 |
| MOL006209 | cyanin         | Prostaglandir | 94   | 290  | 0.93541 | 0.748 |
| MOL006209 | cyanin         | Heat shock p  | 444  | 1939 | 0.88277 | 0.7   |
| MOL007449 | 24-methylide   | Progesterone  | 209  | 614  | 0.91733 | 0.714 |
| MOL007449 | 24-methylide   | Nuclear recep | 3276 | 6241 | 0.81328 | 0.706 |
| MOL007449 | 24-methylide   | Mineralocorti | 252  | 737  | 0.93315 | 0.702 |
| MOL008173 | daucosterol_c  | Progesterone  | 209  | 614  | 0.8982  | 0.726 |
| MOL008173 | daucosterol_c  | Nuclear recep | 3276 | 6241 | 0.80024 | 0.7   |
| MOL008400 | glycitein      | Prostaglandir | 6    | 20   | 0.83846 | 0.73  |
| MOL008400 | glycitein      | Estrogen rece | 46   | 136  | 0.9284  | 0.798 |
| MOL008400 | glycitein      | Androgen rec  | 48   | 146  | 0.86537 | 0.742 |
| MOL008400 | glycitein      | Peroxisome p  | 78   | 238  | 0.93063 | 0.726 |
| MOL008400 | glycitein      | Prostaglandir | 94   | 290  | 0.90824 | 0.822 |
| MOL008400 | glycitein      | Retinoic acid | 158  | 459  | 0.90521 | 0.714 |
| MOL008400 | glycitein      | CGMP-inhibi   | 172  | 485  | 0.81652 | 0.7   |
| MOL008400 | glycitein      | Estrogen rece | 307  | 869  | 0.89075 | 0.73  |
| MOL008400 | glycitein      | Mitogen-acti  | 402  | 1540 | 0.90411 | 0.716 |
| MOL008400 | glycitein      | Glycogen syn  | 422  | 1721 | 0.86999 | 0.724 |

|           |               |                 |      |      |                        |       |
|-----------|---------------|-----------------|------|------|------------------------|-------|
| MOL008400 | glycitein     | Heat shock p    | 444  | 1939 | 0.96289                | 0.708 |
| MOL008400 | glycitein     | Cell division p | 482  | 2240 | 0.94233                | 0.744 |
| MOL008400 | glycitein     | Serine/threor   | 647  | 5790 | 0.86133                | 0.702 |
| MOL008400 | glycitein     | Trypsin-1       | 2928 | 3176 | 0.88255                | 0.75  |
| MOL008400 | glycitein     | Proto-oncog     | 2966 | 2347 | 0.85589                | 0.738 |
| MOL008400 | glycitein     | Cyclin-A2       | 3025 | 6235 | 0.93871                | 0.726 |
| MOL008400 | glycitein     | Calmodulin      | 3907 | 465  | 0.82965                | 0.716 |
| MOL008400 | glycitein     | mRNA of PKA     | 699  | 6263 | 0.8956                 | 0.714 |
| MOL008400 | glycitein     | Nuclear recep   | 3279 | 6228 | 0.80649                | 0.702 |
| MOL008400 | glycitein     | Nitric oxide s  | 3    | 7    | validate,RF_score":nul |       |
| MOL008400 | glycitein     | Amyloid beta    | 648  | 5800 | validate,RF_score":nul |       |
| MOL008400 | glycitein     | Collagenase     | 377  | 1330 | validate,RF_score":nul |       |
| MOL008400 | glycitein     | Neutrophil cc   | 468  | 2154 | validate,RF_score":nul |       |
| MOL000953 | CLR           | Progesterone    | 209  | 614  | 0.90533                | 0.758 |
| MOL000953 | CLR           | Mineralocorti   | 252  | 737  | 0.92839                | 0.7   |
| MOL000953 | CLR           | Cytochrome      | 1143 | 2298 | 0.92028                | 0.764 |
| MOL000953 | CLR           | Nuclear recep   | 3276 | 6241 | 0.80029                | 0.718 |
| MOL009604 | 14b-pregnan   | Prostaglandir   | 94   | 290  | 0.90609                | 0.7   |
| MOL009604 | 14b-pregnan   | Progesterone    | 209  | 614  | 0.91211                | 0.716 |
| MOL009604 | 14b-pregnan   | Nuclear recep   | 3276 | 6241 | 0.88388                | 0.73  |
| MOL009617 | 24-ethylchol  | Progesterone    | 209  | 614  | 0.91457                | 0.728 |
| MOL009618 | 24-ethylchol  | Progesterone    | 209  | 614  | 0.91099                | 0.738 |
| MOL009618 | 24-ethylchol  | Mineralocorti   | 252  | 737  | 0.93608                | 0.706 |
| MOL009620 | 24-methyl-3   | Progesterone    | 209  | 614  | 0.89565                | 0.704 |
| MOL009621 | 24-methylen   | Progesterone    | 209  | 614  | 0.88263                | 0.706 |
| MOL009622 | Fucosterol    | Progesterone    | 209  | 614  | 0.9048                 | 0.718 |
| MOL009622 | Fucosterol    | Mineralocorti   | 252  | 737  | 0.94219                | 0.706 |
| MOL009622 | Fucosterol    | Nuclear recep   | 3276 | 6241 | 0.82436                | 0.72  |
| MOL009633 | 31-norlanost  | Progesterone    | 209  | 614  | 0.91482                | 0.718 |
| MOL009634 | 31-norlanost  | Progesterone    | 209  | 614  | 0.91796                | 0.718 |
| MOL009634 | 31-norlanost  | Mineralocorti   | 252  | 737  | 0.94638                | 0.704 |
| MOL009634 | 31-norlanost  | Nuclear recep   | 3276 | 6241 | 0.8419                 | 0.7   |
| MOL009635 | 4,24-methyl   | Progesterone    | 209  | 614  | 0.90404                | 0.718 |
| MOL009639 | Lophenol      | Progesterone    | 209  | 614  | 0.9014                 | 0.744 |
| MOL009640 | 4alpha,14alp  | Progesterone    | 209  | 614  | 0.90894                | 0.712 |
| MOL009641 | 4alpha,24-dir | Progesterone    | 209  | 614  | 0.90924                | 0.73  |
| MOL009641 | 4alpha,24-dir | Mineralocorti   | 252  | 737  | 0.93436                | 0.702 |
| MOL009641 | 4alpha,24-dir | Nuclear recep   | 3276 | 6241 | 0.81423                | 0.716 |
| MOL009642 | 4alpha-meth   | Progesterone    | 209  | 614  | 0.9088                 | 0.728 |
| MOL009644 | 6-Fluoroindo  | Progesterone    | 209  | 614  | 0.86245                | 0.704 |
| MOL009644 | 6-Fluoroindo  | Mineralocorti   | 252  | 737  | 0.87879                | 0.704 |
| MOL009644 | 6-Fluoroindo  | Glucocorticoi   | 308  | 871  | 0.85792                | 0.72  |
| MOL009646 | 7-O-Methyl    | Prostaglandir   | 94   | 290  | 0.92065                | 0.802 |
| MOL009646 | 7-O-Methyl    | DNA topoiso     | 287  | 817  | 0.81158                | 0.71  |
| MOL009646 | 7-O-Methyl    | Heat shock p    | 444  | 1939 | 0.9742                 | 0.72  |
| MOL009646 | 7-O-Methyl    | Nuclear recep   | 3276 | 6241 | 0.8099                 | 0.802 |
| MOL009646 | 7-O-Methyl    | Calmodulin      | 3907 | 465  | 0.81658                | 0.71  |
| MOL009650 | Atropine      | Dopamine D      | 7    | 23   | 0.81925                | 0.71  |
| MOL009650 | Atropine      | Muscarinic ac   | 16   | 51   | 0.9158                 | 0.762 |
| MOL009650 | Atropine      | Muscarinic ac   | 38   | 103  | 0.95409                | 0.76  |
| MOL009650 | Atropine      | D(1B) dopam     | 56   | 163  | 0.80837                | 0.706 |
| MOL009650 | Atropine      | Beta-1 adren    | 63   | 193  | 0.84899                | 0.742 |
| MOL009650 | Atropine      | Sodium chan     | 70   | 220  | 0.80021                | 0.76  |
| MOL009650 | Atropine      | Muscarinic ac   | 87   | 274  | 0.87627                | 0.742 |

|           |               |                |      |      |                        |       |
|-----------|---------------|----------------|------|------|------------------------|-------|
| MOL009650 | Atropine      | Alpha-2A ad    | 105  | 318  | 0.88652                | 0.722 |
| MOL009650 | Atropine      | 5-hydroxytry   | 106  | 320  | 0.86538                | 0.704 |
| MOL009650 | Atropine      | Alpha-2C ad    | 126  | 378  | 0.83975                | 0.73  |
| MOL009650 | Atropine      | Muscarinic ac  | 154  | 450  | 0.93612                | 0.716 |
| MOL009650 | Atropine      | Delta-type op  | 163  | 467  | 0.93924                | 0.738 |
| MOL009650 | Atropine      | Histamine H1   | 173  | 492  | 0.87804                | 0.704 |
| MOL009650 | Atropine      | 5-hydroxytry   | 175  | 502  | 0.86422                | 0.72  |
| MOL009650 | Atropine      | Sodium-depe    | 186  | 540  | 0.94955                | 0.734 |
| MOL009650 | Atropine      | Alpha-1A ad    | 191  | 556  | 0.88218                | 0.738 |
| MOL009650 | Atropine      | 5-hydroxytry   | 203  | 590  | 0.8828                 | 0.714 |
| MOL009650 | Atropine      | Muscarinic ac  | 210  | 617  | 0.97096                | 0.72  |
| MOL009650 | Atropine      | Alpha-2B ad    | 214  | 629  | 0.92839                | 0.732 |
| MOL009650 | Atropine      | Alpha-1B ad    | 216  | 632  | 0.87921                | 0.778 |
| MOL009650 | Atropine      | Sodium-depe    | 239  | 713  | 0.93036                | 0.738 |
| MOL009650 | Atropine      | Beta-2 adren   | 261  | 766  | 0.90678                | 0.738 |
| MOL009650 | Atropine      | Sodium-depe    | 290  | 824  | 0.94584                | 0.746 |
| MOL009650 | Atropine      | D(2) dopamin   | 292  | 831  | 0.90348                | 0.742 |
| MOL009650 | Atropine      | Mu-type opic   | 299  | 847  | 0.84137                | 0.73  |
| MOL009650 | Atropine      | Gamma-amir     | 309  | 872  | 0.87645                | 0.746 |
| MOL009650 | Atropine      | 5-hydroxytry   | 310  | 885  | 0.84243                | 0.706 |
| MOL009656 | (E,E)-1-ethyl | Nuclear recep  | 3276 | 6241 | 0.80451                | 0.716 |
| MOL009665 | Physcion-8-(C | DNA topoiso    | 287  | 817  | 0.82445                | 0.704 |
| MOL009677 | lanost-8-en-  | Progesterone   | 209  | 614  | 0.90166                | 0.722 |
| MOL009677 | lanost-8-en-  | Mineralocorti  | 252  | 737  | 0.93905                | 0.702 |
| MOL009678 | lanost-8-eno  | Progesterone   | 209  | 614  | 0.90351                | 0.728 |
| MOL009678 | lanost-8-eno  | Mineralocorti  | 252  | 737  | 0.93969                | 0.706 |
| MOL009681 | Obtusifoliol  | Progesterone   | 209  | 614  | 0.90411                | 0.718 |
| MOL009681 | Obtusifoliol  | Mineralocorti  | 252  | 737  | 0.93936                | 0.7   |
| MOL009681 | Obtusifoliol  | Nuclear recep  | 3276 | 6241 | 0.8108                 | 0.702 |
| MOL001558 | sesamin       | Coagulation f  | 79   | 239  | 0.81773                | 0.7   |
| MOL001558 | sesamin       | Prostaglandir  | 94   | 290  | 0.90863                | 0.746 |
| MOL001558 | sesamin       | Sodium chan    | 70   | 220  | 0.81341                | 0.702 |
| MOL001558 | sesamin       | G1/S-specific  | 4214 | h001 | validate,RF_score":nul |       |
| MOL001558 | sesamin       | Interleukin-1  | 4292 | h001 | validate,RF_score":nul |       |
| MOL001558 | sesamin       | Fatty acid syr | 374  | 1295 | validate,RF_score":nul |       |
| MOL001558 | sesamin       | Acetyl-CoA c   | 231  | 690  | validate,RF_score":nul |       |
| MOL001558 | sesamin       | Glucose-6-p    | 1604 | 2630 | validate,RF_score":nul |       |
| MOL001558 | sesamin       | Nitric oxide s | 4395 | h001 | validate,RF_score":nul |       |
| MOL001558 | sesamin       | Endothelin-c   | 706  | 6295 | validate,RF_score":nul |       |
| MOL001558 | sesamin       | Medium-cha     | 2967 | 3185 | validate,RF_score":nul |       |
| MOL001558 | sesamin       | Cytochrome     | 670  | 6030 | validate,RF_score":nul |       |
| MOL001558 | sesamin       | UDP-glucuro    | 4614 | h001 | validate,RF_score":nul |       |
| MOL001558 | sesamin       | Sterol regulat | 4543 | h001 | validate,RF_score":nul |       |
| MOL001558 | sesamin       | NADPH oxid     | 4380 | h001 | validate,RF_score":nul |       |
| MOL001558 | sesamin       | NADPH oxid     | 4379 | h001 | validate,RF_score":nul |       |
| MOL001558 | sesamin       | Peroxisomal    | 3268 | 6639 | validate,RF_score":nul |       |
| MOL001558 | sesamin       | ATP-citrate s  | 4039 | h001 | validate,RF_score":nul |       |
| MOL001558 | sesamin       | Peroxisomal l  | 3981 | 643  | validate,RF_score":nul |       |
| MOL001558 | sesamin       | Methylglutac   | 4347 | h001 | validate,RF_score":nul |       |
| MOL001558 | sesamin       | Trifunctional  | 4579 | h001 | validate,RF_score":nul |       |
| MOL001558 | sesamin       | 2,4-dienoyl-(  | 3290 | 5325 | validate,RF_score":nul |       |
| MOL001558 | sesamin       | 3,2-trans-eno  | 3215 | 3211 | validate,RF_score":nul |       |
| MOL000184 | NSC63551      | Progesterone   | 209  | 614  | 0.90218                | 0.718 |
| MOL000354 | isorhamnetin  | Nitric oxide s | 3    | 7    | validate 0.90092       | 0.714 |

|           |                              |      |      |                        |       |
|-----------|------------------------------|------|------|------------------------|-------|
| MOL000354 | isorhamnetin Prostaglandin   | 6    | 20   | 0.89445                | 0.704 |
| MOL000354 | isorhamnetin Estrogen recep  | 46   | 136  | 0.96214                | 0.772 |
| MOL000354 | isorhamnetin Androgen recep  | 48   | 146  | 0.90551                | 0.768 |
| MOL000354 | isorhamnetin Peroxisome p    | 78   | 238  | 0.92065                | 0.71  |
| MOL000354 | isorhamnetin Prostaglandin   | 94   | 290  | 0.93889                | 0.822 |
| MOL000354 | isorhamnetin mRNA of Pro     | 229  | 687  | 0.9092                 | 0.732 |
| MOL000354 | isorhamnetin Estrogen recep  | 307  | 869  | 0.93671                | 0.732 |
| MOL000354 | isorhamnetin Dipeptidyl pe   | 332  | 952  | 0.90354                | 0.716 |
| MOL000354 | isorhamnetin Mitogen-acti    | 402  | 1540 | 0.93787                | 0.73  |
| MOL000354 | isorhamnetin Glycogen syn    | 422  | 1721 | 0.94096                | 0.732 |
| MOL000354 | isorhamnetin Heat shock p    | 444  | 1939 | 0.96801                | 0.734 |
| MOL000354 | isorhamnetin Cell division p | 482  | 2240 | 0.95091                | 0.738 |
| MOL000354 | isorhamnetin Phosphatidyl    | 491  | 2404 | 0.92739                | 0.708 |
| MOL000354 | isorhamnetin mRNA of PKA     | 699  | 6263 | 0.93097                | 0.702 |
| MOL000354 | isorhamnetin Trypsin-1       | 2928 | 3176 | 0.87332                | 0.76  |
| MOL000354 | isorhamnetin Proto-oncog     | 2966 | 2347 | 0.8732                 | 0.744 |
| MOL000354 | isorhamnetin Cyclin-A2       | 3025 | 6235 | 0.9538                 | 0.716 |
| MOL000354 | isorhamnetin Nuclear recep   | 3276 | 6241 | 0.81305                | 0.808 |
| MOL000354 | isorhamnetin Calmodulin      | 3907 | 465  | 0.82855                | 0.72  |
| MOL000354 | isorhamnetin Glycogen pho    | 350  | 1152 | 0.89053                | 0.706 |
| MOL000354 | isorhamnetin Peroxisome p    | 396  | 1502 | 0.85846                | 0.702 |
| MOL000354 | isorhamnetin Serine/threor   | 647  | 5790 | 0.90953                | 0.7   |
| MOL000354 | isorhamnetin Aldose reduc    | 288  | 822  | 0.84719                | 0.706 |
| MOL000354 | isorhamnetin Nuclear recep   | 3279 | 6228 | 0.84297                | 0.71  |
| MOL000354 | isorhamnetin Coagulation f   | 123  | 369  | 0.81189                | 0.7   |
| MOL000354 | isorhamnetin Thrombin        | 17   | 54   | 0.93089                | 0.81  |
| MOL000354 | isorhamnetin Nitric-oxide s  | 95   | 291  | 0.92749                | 0.784 |
| MOL000354 | isorhamnetin Acetylcholine   | 165  | 474  | 0.95402                | 0.766 |
| MOL000354 | isorhamnetin Gamma-amir      | 309  | 872  | 0.93901                | 0.724 |
| MOL000354 | isorhamnetin Amine oxidas    | 565  | 3939 | 0.9069                 | 0.704 |
| MOL000354 | isorhamnetin Glutamate re    | 3216 | 921  | 0.86012                | 0.712 |
| MOL000354 | isorhamnetin Cytochrome      | 1143 | 2298 | 0.92544                | 0.794 |
| MOL000354 | isorhamnetin Transcription   | 4565 | h001 | validate,RF_score":nul |       |
| MOL000354 | isorhamnetin Xanthine deh    | 568  | 3947 | validate,RF_score":nul |       |
| MOL000354 | isorhamnetin Neutrophil cy   | 4391 | h001 | validate,RF_score":nul |       |
| MOL000354 | isorhamnetin Oxidized low    | 4412 | h001 | validate,RF_score":nul |       |
| MOL005043 | campest-5-e Progesterone     | 209  | 614  | 0.90454                | 0.742 |
| MOL005440 | Isofucosterol Progesterone   | 209  | 614  | 0.90506                | 0.734 |
| MOL005440 | Isofucosterol Mineralocorti  | 252  | 737  | 0.93339                | 0.704 |
| MOL005440 | Isofucosterol 4-aminobuty    | 92   | 280  | 0.81963                | 0.706 |
| MOL005440 | Isofucosterol Gamma-amir     | 309  | 872  | 0.8773                 | 0.734 |
| MOL005440 | Isofucosterol Alcohol dehy   | 726  | 444  | 0.94359                | 0.734 |
| MOL005440 | Isofucosterol Alcohol dehy   | 727  | 517  | 0.94889                | 0.752 |
| MOL005440 | Isofucosterol Alcohol dehy   | 729  | 251  | 0.92878                | 0.712 |
| MOL005440 | Isofucosterol Cytochrome     | 1143 | 2298 | 0.94997                | 0.706 |
| MOL005440 | Isofucosterol Lysozyme       | 1172 | 2300 | 0.88462                | 0.708 |
| MOL005440 | Isofucosterol Bacillolysin   | 1961 | 2457 | 0.96517                | 0.722 |
| MOL005440 | Isofucosterol Nicotinate-ni  | 2262 | 2264 | 0.84801                | 0.762 |
| MOL005440 | Isofucosterol Nuclear recep  | 3276 | 6241 | 0.80819                | 0.724 |
| MOL005944 | matrine Transcription        | 4565 | h001 | validate,RF_score":nul |       |
| MOL005944 | matrine 72 kDa type I        | 238  | 707  | validate,RF_score":nul |       |
| MOL005944 | matrine Tumor necro:         | 265  | 777  | validate,RF_score":nul |       |
| MOL005944 | matrine Interleukin-6        | 351  | 1159 | validate,RF_score":nul |       |
| MOL005944 | matrine Caspase-3            | 4087 | h001 | validate,RF_score":nul |       |

|           |               |                 |      |      |                        |       |
|-----------|---------------|-----------------|------|------|------------------------|-------|
| MOL005944 | matrine       | Myc proto-onc   | 4372 | h001 | validate,RF_score":nul |       |
| MOL005944 | matrine       | Intercellular a | 4287 | h001 | validate,RF_score":nul |       |
| MOL005944 | matrine       | Heparanase      | 4250 | h001 | validate,RF_score":nul |       |
| MOL005944 | matrine       | Immediate ea    | 4266 | h001 | validate,RF_score":nul |       |
| MOL005944 | matrine       | CD44 antigen    | 4108 | h001 | validate,RF_score":nul |       |
| MOL010861 | vitamin d     | Progesterone    | 209  | 614  |                        |       |
| MOL013112 | (+)-4-cholest | Progesterone    | 209  | 614  |                        |       |
| MOL009729 | 10-Nonadec    | Nuclear recep   | 3276 | 6241 |                        |       |
| MOL005030 | 11-eicoseno   | Prostaglandin   | 6    | 20   |                        |       |
| MOL002776 | Baicalin      | Coagulation t   | 79   | 239  | 0.83996                | 0.722 |
| MOL002776 | Baicalin      | mRNA of Pro     | 229  | 687  | 0.95372                | 0.716 |
| MOL004598 | 3,5,6,7-tetr  | Thrombin        | 17   | 54   | 0.95807                | 0.714 |
| MOL004598 | 3,5,6,7-tetr  | Estrogen rece   | 46   | 136  | 0.97857                | 0.738 |
| MOL004598 | 3,5,6,7-tetr  | Androgen rec    | 48   | 146  | 0.97301                | 0.722 |
| MOL004598 | 3,5,6,7-tetr  | Coagulation t   | 79   | 239  | 0.95163                | 0.708 |
| MOL004598 | 3,5,6,7-tetr  | Prostaglandin   | 94   | 290  | 0.93087                | 0.736 |
| MOL004598 | 3,5,6,7-tetr  | Coagulation t   | 123  | 369  | 0.95659                | 0.7   |
| MOL004598 | 3,5,6,7-tetr  | Acetylcholine   | 165  | 474  | 0.93985                | 0.702 |
| MOL004598 | 3,5,6,7-tetr  | DNA topoiso     | 287  | 817  | 0.94981                | 0.722 |
| MOL004598 | 3,5,6,7-tetr  | Estrogen rece   | 307  | 869  | 0.98324                | 0.7   |
| MOL004598 | 3,5,6,7-tetr  | Trypsin-1       | 2928 | 3176 | 0.96448                | 0.71  |
| MOL004598 | 3,5,6,7-tetr  | Nuclear recep   | 3276 | 6241 | 0.89839                | 0.752 |
| MOL004598 | 3,5,6,7-tetr  | Calmodulin      | 3907 | 465  | 0.8381                 | 0.72  |
| MOL004609 | Areapillin    | Nitric oxide s  | 3    | 7    | 0.92645                | 0.74  |
| MOL004609 | Areapillin    | Thrombin        | 17   | 54   | 0.88134                | 0.7   |
| MOL004609 | Areapillin    | Androgen rec    | 48   | 146  | 0.95046                | 0.768 |
| MOL004609 | Areapillin    | Sodium chan     | 70   | 220  | 0.92602                | 0.702 |
| MOL004609 | Areapillin    | Coagulation t   | 79   | 239  | 0.87997                | 0.72  |
| MOL004609 | Areapillin    | Prostaglandin   | 94   | 290  | 0.91773                | 0.77  |
| MOL004609 | Areapillin    | Coagulation t   | 123  | 369  | 0.9101                 | 0.734 |
| MOL004609 | Areapillin    | mRNA of Pro     | 229  | 687  | 0.95039                | 0.714 |
| MOL004609 | Areapillin    | DNA topoiso     | 287  | 817  | 0.92226                | 0.726 |
| MOL004609 | Areapillin    | Estrogen rece   | 307  | 869  | 0.97387                | 0.706 |
| MOL004609 | Areapillin    | Dipeptidyl pe   | 332  | 952  | 0.92532                | 0.728 |
| MOL004609 | Areapillin    | Heat shock p    | 444  | 1939 | 0.98445                | 0.722 |
| MOL004609 | Areapillin    | Ig gamma-1      | 1201 | 4785 | 0.82358                | 0.7   |
| MOL004609 | Areapillin    | Trypsin-1       | 2928 | 3176 | 0.9572                 | 0.774 |
| MOL004609 | Areapillin    | Nuclear recep   | 3276 | 6241 | 0.86385                | 0.794 |
| MOL004609 | Areapillin    | Nuclear recep   | 3279 | 6228 | 0.93108                | 0.712 |
| MOL004609 | Areapillin    | Calmodulin      | 3907 | 465  | 0.8582                 | 0.726 |
| MOL013187 | Cubebin       | Prostaglandin   | 6    | 20   | 0.89181                | 0.704 |
| MOL013187 | Cubebin       | Coagulation t   | 79   | 239  | 0.80732                | 0.714 |
| MOL013187 | Cubebin       | Prostaglandin   | 94   | 290  | 0.91067                | 0.766 |
| MOL013187 | Cubebin       | Beta-2 adren    | 261  | 766  | 0.94282                | 0.702 |
| MOL013187 | Cubebin       | Heat shock p    | 444  | 1939 | 0.91435                | 0.714 |
| MOL004624 | Longikaurin A | Muscarinic ac   | 38   | 103  | 0.83983                | 0.726 |
| MOL004624 | Longikaurin A | Gamma-amir      | 141  | 423  | 0.8608                 | 0.722 |
| MOL004624 | Longikaurin A | Gamma-amir      | 200  | 580  | 0.82809                | 0.704 |
| MOL004624 | Longikaurin A | Muscarinic ac   | 210  | 617  | 0.88702                | 0.764 |
| MOL004624 | Longikaurin A | Trypsin-1       | 2928 | 3176 | 0.878                  | 0.724 |
| MOL004624 | Longikaurin A | Gamma-amir      | 3284 | 841  | 0.85481                | 0.706 |
| MOL004653 | (+)-Anomalir  | Thrombin        | 17   | 54   | 0.93952                | 0.73  |
| MOL004653 | (+)-Anomalir  | Potassium vo    | 37   | 101  | 0.91819                | 0.708 |
| MOL004653 | (+)-Anomalir  | Coagulation t   | 79   | 239  | 0.90411                | 0.72  |

|           |              |                 |      |      |         |       |
|-----------|--------------|-----------------|------|------|---------|-------|
| MOL004653 | (+)-Anomalir | Prostaglandir   | 94   | 290  | 0.93609 | 0.736 |
| MOL004653 | (+)-Anomalir | DNA topoiso     | 287  | 817  | 0.90891 | 0.718 |
| MOL004653 | (+)-Anomalir | Dipeptidyl pe   | 332  | 952  | 0.93224 | 0.702 |
| MOL004718 | \u03b1-spin  | Progesterone    | 209  | 614  | 0.92249 | 0.716 |
| MOL004718 | \u03b1-spin  | Mineralocorti   | 252  | 737  | 0.9432  | 0.706 |
| MOL004718 | \u03b1-spin  | Nuclear recep   | 3276 | 6241 | 0.8094  | 0.722 |
| MOL000490 | petunidin    | Nitric oxide s  | 3    | 7    | 0.85627 | 0.744 |
| MOL000490 | petunidin    | Prostaglandir   | 6    | 20   | 0.86621 | 0.704 |
| MOL000490 | petunidin    | Prostaglandir   | 94   | 290  | 0.92136 | 0.808 |
| MOL000490 | petunidin    | Estrogen rece   | 307  | 869  | 0.92965 | 0.756 |
| MOL000490 | petunidin    | Mitogen-acti    | 402  | 1540 | 0.94461 | 0.748 |
| MOL000490 | petunidin    | Glycogen syn    | 422  | 1721 | 0.92539 | 0.718 |
| MOL000490 | petunidin    | Heat shock p    | 444  | 1939 | 0.96355 | 0.71  |
| MOL000490 | petunidin    | Nuclear recep   | 3276 | 6241 | 0.82553 | 0.764 |
| MOL002135 | Myricanone   | Nitric oxide s  | 3    | 7    | 0.8996  | 0.762 |
| MOL002135 | Myricanone   | Prostaglandir   | 6    | 20   | 0.93034 | 0.734 |
| MOL002135 | Myricanone   | Thrombin        | 17   | 54   | 0.90245 | 0.728 |
| MOL002135 | Myricanone   | Potassium vo    | 37   | 101  | 0.85631 | 0.72  |
| MOL002135 | Myricanone   | Estrogen rece   | 46   | 136  | 0.96537 | 0.848 |
| MOL002135 | Myricanone   | Androgen rec    | 48   | 146  | 0.92092 | 0.776 |
| MOL002135 | Myricanone   | Sodium chan     | 70   | 220  | 0.90515 | 0.73  |
| MOL002135 | Myricanone   | Peroxisome p    | 78   | 238  | 0.85206 | 0.728 |
| MOL002135 | Myricanone   | Prostaglandir   | 94   | 290  | 0.92395 | 0.808 |
| MOL002135 | Myricanone   | Coagulation t   | 123  | 369  | 0.85675 | 0.706 |
| MOL002135 | Myricanone   | Vascular end    | 139  | 407  | 0.82526 | 0.71  |
| MOL002135 | Myricanone   | Retinoic acid   | 158  | 459  | 0.90161 | 0.708 |
| MOL002135 | Myricanone   | CGMP-inhibi     | 172  | 485  | 0.9009  | 0.706 |
| MOL002135 | Myricanone   | Beta-2 adren    | 261  | 766  | 0.89842 | 0.718 |
| MOL002135 | Myricanone   | Estrogen rece   | 307  | 869  | 0.92505 | 0.758 |
| MOL002135 | Myricanone   | Dipeptidyl pe   | 332  | 952  | 0.92725 | 0.722 |
| MOL002135 | Myricanone   | Mitogen-acti    | 402  | 1540 | 0.87018 | 0.71  |
| MOL002135 | Myricanone   | Glycogen syn    | 422  | 1721 | 0.90056 | 0.74  |
| MOL002135 | Myricanone   | Heat shock p    | 444  | 1939 | 0.95232 | 0.756 |
| MOL002135 | Myricanone   | Cell division p | 482  | 2240 | 0.87199 | 0.726 |
| MOL002135 | Myricanone   | Serine/threor   | 647  | 5790 | 0.9007  | 0.722 |
| MOL002135 | Myricanone   | Ig gamma-1      | 1201 | 4785 | 0.82953 | 0.704 |
| MOL002135 | Myricanone   | Proto-oncog     | 2966 | 2347 | 0.87711 | 0.754 |
| MOL002135 | Myricanone   | Cyclin-A2       | 3025 | 6235 | 0.93727 | 0.73  |
| MOL002135 | Myricanone   | Nuclear recep   | 3279 | 6228 | 0.83127 | 0.718 |
| MOL002140 | Perlolyrine  | Thrombin        | 17   | 54   | 0.82064 | 0.766 |
| MOL002140 | Perlolyrine  | Prostaglandir   | 94   | 290  | 0.82936 | 0.798 |
| MOL002140 | Perlolyrine  | Retinoic acid   | 158  | 459  | 0.80629 | 0.7   |
| MOL002140 | Perlolyrine  | mRNA of PKA     | 699  | 6263 | 0.88036 | 0.724 |
| MOL002157 | wallichilide | Prostaglandir   | 94   | 290  | 0.80932 | 0.71  |
| MOL002157 | wallichilide | Mineralocorti   | 252  | 737  | 0.93214 | 0.708 |
| MOL002157 | wallichilide | Glucocorticoi   | 308  | 871  | 0.91924 | 0.72  |
| MOL002157 | wallichilide | Nuclear recep   | 3276 | 6241 | 0.82681 | 0.746 |
| MOL000433 | FA           | Cell division p | 482  | 2240 | 0.9112  | 0.704 |
| MOL000433 | FA           | Thrombin        | 17   | 54   | 0.81384 | 0.746 |
| MOL000433 | FA           | Glycogen syn    | 422  | 1721 | 0.86197 | 0.7   |









































|          |                |    |             |      |
|----------|----------------|----|-------------|------|
| ANPEP    | Protein Coding | 54 | GC15M089784 | 2.68 |
| MDC1     | Protein Coding | 47 | GC06M030714 | 2.68 |
| NOD2     | Protein Coding | 54 | GC16P050693 | 2.67 |
| FEZF1    | Protein Coding | 43 | GC07M122301 | 2.67 |
| EPHA3    | Protein Coding | 51 | GC03P089077 | 2.67 |
| AIMP1    | Protein Coding | 49 | GC04P106315 | 2.67 |
| SLC10A2  | Protein Coding | 46 | GC13M103043 | 2.67 |
| MSX2     | Protein Coding | 54 | GC05P174724 | 2.67 |
| VCAN     | Protein Coding | 53 | GC05P083471 | 2.67 |
| NUP62    | Protein Coding | 51 | GC19M049906 | 2.67 |
| MIR101-1 | RNA Gene       | 19 | GC01M065058 | 2.66 |
| TAP1     | Protein Coding | 54 | GC06M032869 | 2.66 |
| DAXX     | Protein Coding | 50 | GC06M033318 | 2.66 |
| MAGED2   | Protein Coding | 45 | GC0XP054807 | 2.66 |
| TRIM25   | Protein Coding | 51 | GC17M056836 | 2.66 |
| BAG1     | Protein Coding | 49 | GC09M033245 | 2.65 |
| IL6ST    | Protein Coding | 51 | GC05M055935 | 2.65 |
| SOCS1    | Protein Coding | 50 | GC16M011255 | 2.65 |
| HSP90B1  | Protein Coding | 51 | GC12P103930 | 2.65 |
| PRDX3    | Protein Coding | 48 | GC10M119167 | 2.65 |
| STAT5A   | Protein Coding | 52 | GC17P042287 | 2.65 |
| MIR149   | RNA Gene       | 20 | GC02P240456 | 2.65 |
| FHL2     | Protein Coding | 52 | GC02M105343 | 2.65 |
| SLC31A1  | Protein Coding | 50 | GC09P113221 | 2.64 |
| NAT2     | Protein Coding | 49 | GC08P018391 | 2.64 |
| ACTB     | Protein Coding | 56 | GC07M005527 | 2.64 |
| HOXA9    | Protein Coding | 45 | GC07M027162 | 2.64 |
| YWHAZ    | Protein Coding | 53 | GC08M100917 | 2.64 |
| UGCG     | Protein Coding | 48 | GC09P111896 | 2.64 |
| CDC25C   | Protein Coding | 54 | GC05M138296 | 2.64 |
| COL4A5   | Protein Coding | 48 | GC0XP108439 | 2.64 |
| MAP1LC3A | Protein Coding | 50 | GC20P034546 | 2.64 |
| MAP4     | Protein Coding | 48 | GC03M047892 | 2.64 |
| SRD5A2   | Protein Coding | 48 | GC02M031485 | 2.64 |
| KCNQ1OT1 | RNA Gene       | 28 | GC11M002661 | 2.64 |
| CMIP     | Protein Coding | 40 | GC16P081478 | 2.63 |
| ITGA6    | Protein Coding | 56 | GC02P172427 | 2.63 |
| HIST4H4  | Protein Coding | 45 | GC12M014767 | 2.63 |
| PROC     | Protein Coding | 56 | GC02P127418 | 2.62 |
| MCM2     | Protein Coding | 53 | GC03P127598 | 2.62 |
| TRPV1    | Protein Coding | 53 | GC17M003565 | 2.62 |
| CDC25A   | Protein Coding | 54 | GC03M048173 | 2.61 |
| ENPP2    | Protein Coding | 50 | GC08M119556 | 2.61 |
| ITGA5    | Protein Coding | 54 | GC12M054396 | 2.61 |
| MIR181A1 | RNA Gene       | 19 | GC01M198860 | 2.61 |
| NTF4     | Protein Coding | 50 | GC19M049061 | 2.61 |
| TTC8     | Protein Coding | 46 | GC14P088942 | 2.6  |
| DDAH2    | Protein Coding | 48 | GC06M031727 | 2.6  |
| BAP1     | Protein Coding | 51 | GC03M052410 | 2.6  |
| CFL1     | Protein Coding | 51 | GC11M065823 | 2.6  |
| CFI      | Protein Coding | 52 | GC04M109740 | 2.6  |
| CYP2C8   | Protein Coding | 55 | GC10M095038 | 2.6  |
| EPHX1    | Protein Coding | 53 | GC01P225810 | 2.6  |
| BIRC2    | Protein Coding | 52 | GC11P102347 | 2.6  |
| TERF2IP  | Protein Coding | 48 | GC16P075647 | 2.6  |
| HULC     | RNA Gene       | 18 | GC06P008652 | 2.6  |
| TUBA1B   | Protein Coding | 48 | GC12M049127 | 2.59 |
| CSF3R    | Protein Coding | 54 | GC01M036466 | 2.59 |
| TLR3     | Protein Coding | 58 | GC04P186059 | 2.59 |
| MIR130B  | RNA Gene       | 19 | GC22P022173 | 2.58 |
| BNC2     | Protein Coding | 44 | GC09M016410 | 2.58 |
| MIR185   | RNA Gene       | 22 | GC22P020034 | 2.58 |
| ANTXR1   | Protein Coding | 53 | GC02P068977 | 2.58 |
| KLK1     | Protein Coding | 50 | GC19M050819 | 2.56 |
| ABCB11   | Protein Coding | 53 | GC02M168922 | 2.56 |
| PDCD4    | Protein Coding | 49 | GC10P110871 | 2.56 |
| PGRMC1   | Protein Coding | 50 | GC0XP119236 | 2.56 |
| RBBP8    | Protein Coding | 51 | GC18P022798 | 2.56 |
| IL21     | Protein Coding | 50 | GC04M122612 | 2.55 |
| ARSH     | Protein Coding | 40 | GC0XP003006 | 2.55 |
| MAP3K5   | Protein Coding | 54 | GC06M136500 | 2.55 |
| KIAA1324 | Protein Coding | 43 | GC01P109113 | 2.55 |
| SEMA4A   | Protein Coding | 51 | GC01P156119 | 2.55 |
| NUDT1    | Protein Coding | 48 | GC07P002242 | 2.54 |
| LATS1    | Protein Coding | 50 | GC06M149658 | 2.54 |
| CSTB     | Protein Coding | 52 | GC21M043772 | 2.54 |
| CDKL5    | Protein Coding | 50 | GC0XP018443 | 2.54 |
| BMP7     | Protein Coding | 51 | GC20M057168 | 2.54 |
| MIR10A   | RNA Gene       | 21 | GC17M048579 | 2.54 |
| CKB      | Protein Coding | 52 | GC14M103519 | 2.54 |
| CLOCK    | Protein Coding | 50 | GC04M055427 | 2.54 |
| NTHL1    | Protein Coding | 50 | GC16M002125 | 2.54 |
| CD63     | Protein Coding | 48 | GC12M055725 | 2.54 |
| SKIL     | Protein Coding | 50 | GC03P170357 | 2.53 |
| JAZF1    | Protein Coding | 46 | GC07M027830 | 2.53 |
| NCF1     | Protein Coding | 54 | GC07P074773 | 2.53 |
| EHMT1    | Protein Coding | 53 | GC09P137618 | 2.53 |
| TNFSF15  | Protein Coding | 51 | GC09M114784 | 2.53 |
| KIF1C    | Protein Coding | 48 | GC17P004998 | 2.52 |
| DCX      | Protein Coding | 51 | GC0XM111293 | 2.52 |
| DUSP14   | Protein Coding | 43 | GC17P037489 | 2.52 |
| NCOA1    | Protein Coding | 50 | GC02P024545 | 2.52 |
| CDK5     | Protein Coding | 59 | GC07M151053 | 2.51 |
| MIR29B1  | RNA Gene       | 20 | GC07M130877 | 2.51 |
| VAV3     | Protein Coding | 49 | GC01M107571 | 2.51 |
| DGCR8    | Protein Coding | 47 | GC22P020080 | 2.51 |
| PXN      | Protein Coding | 51 | GC12M120210 | 2.51 |
| RAB5A    | Protein Coding | 51 | GC03P019963 | 2.51 |
| WASF1    | Protein Coding | 50 | GC06M110099 | 2.51 |
| CPQ      | Protein Coding | 40 | GC08P096645 | 2.5  |

|              |                   |    |             |      |
|--------------|-------------------|----|-------------|------|
| SLC12A6      | Protein Coding    | 54 | GC15M034229 | 2.5  |
| TUBA1A       | Protein Coding    | 54 | GC12M049184 | 2.5  |
| TERF2        | Protein Coding    | 45 | GC16M069355 | 2.5  |
| EIF4E        | Protein Coding    | 56 | GC04M098871 | 2.5  |
| PTPN13       | Protein Coding    | 50 | GC04P086594 | 2.49 |
| S100A8       | Protein Coding    | 48 | GC01M153391 | 2.49 |
| SNCAIP       | Protein Coding    | 49 | GC05P122311 | 2.49 |
| IER3         | Protein Coding    | 43 | GC06M030743 | 2.49 |
| ICK          | Protein Coding    | 50 | GC06M053001 | 2.49 |
| HSD17B2      | Protein Coding    | 50 | GC16P082068 | 2.49 |
| ATP6V0A2     | Protein Coding    | 50 | GC12P123712 | 2.49 |
| ASNS         | Protein Coding    | 53 | GC07M097854 | 2.48 |
| VPS37A       | Protein Coding    | 47 | GC08P017246 | 2.48 |
| PYCARD       | Protein Coding    | 49 | GC16M031212 | 2.48 |
| ERG          | Protein Coding    | 52 | GC21M038367 | 2.48 |
| C1QC         | Protein Coding    | 51 | GC01P022643 | 2.48 |
| KAT5         | Protein Coding    | 53 | GC11P065711 | 2.47 |
| LOC106721781 | Biological Region | 3  | GC13U901545 | 2.47 |
| SLC5A6       | Protein Coding    | 50 | GC02M027164 | 2.47 |
| DLC1         | Protein Coding    | 51 | GC08M013083 | 2.47 |
| NSD2         | Protein Coding    | 40 | GC04P001872 | 2.47 |
| AOC1         | Protein Coding    | 45 | GC07P150824 | 2.47 |
| PTPN6        | Protein Coding    | 56 | GC12P007636 | 2.47 |
| TNNC1        | Protein Coding    | 52 | GC03M052485 | 2.46 |
| MSX1         | Protein Coding    | 51 | GC04P004861 | 2.46 |
| CHM          | Protein Coding    | 46 | GC0XM085861 | 2.46 |
| CETP         | Protein Coding    | 53 | GC16P056996 | 2.46 |
| IRS2         | Protein Coding    | 51 | GC13M109752 | 2.46 |
| CD24         | Protein Coding    | 37 | GC06M106969 | 2.46 |
| NR4A1        | Protein Coding    | 53 | GC12P052022 | 2.45 |
| ERAP1        | Protein Coding    | 50 | GC05M096760 | 2.45 |
| ARNTL        | Protein Coding    | 48 | GC11P013276 | 2.44 |
| DVL1         | Protein Coding    | 53 | GC01M001335 | 2.44 |
| HUWE1        | Protein Coding    | 51 | GC0XM053532 | 2.44 |
| REV3L        | Protein Coding    | 50 | GC06M111299 | 2.44 |
| HSPE1        | Protein Coding    | 46 | GC02P197501 | 2.43 |
| NTN1         | Protein Coding    | 50 | GC17P009021 | 2.43 |
| FARSB        | Protein Coding    | 50 | GC02M222570 | 2.42 |
| MIR204       | RNA Gene          | 22 | GC09M070809 | 2.42 |
| ABCG5        | Protein Coding    | 51 | GC02M043776 | 2.41 |
| ABCG8        | Protein Coding    | 48 | GC02P043802 | 2.41 |
| ATP5F1E      | Protein Coding    | 37 | GC20M059026 | 2.41 |
| SLC11A1      | Protein Coding    | 53 | GC02P218382 | 2.41 |
| MIR128-1     | RNA Gene          | 20 | GC02P135665 | 2.4  |
| ACSBG1       | Protein Coding    | 47 | GC15M078167 | 2.4  |
| IL33         | Protein Coding    | 45 | GC09P006206 | 2.4  |
| NOTCH2       | Protein Coding    | 56 | GC01M119911 | 2.4  |
| XPNPEP3      | Protein Coding    | 47 | GC22P040857 | 2.39 |
| GJA4         | Protein Coding    | 50 | GC01P034792 | 2.39 |
| MIR122       | RNA Gene          | 21 | GC18P058451 | 2.39 |
| AXIN2        | Protein Coding    | 54 | GC17M065528 | 2.39 |
| MIR29B2      | RNA Gene          | 17 | GC01M207810 | 2.38 |
| TRAP1        | Protein Coding    | 48 | GC16M003652 | 2.37 |
| PSG2         | Protein Coding    | 41 | GC19M043064 | 2.37 |
| STIP1        | Protein Coding    | 48 | GC11P064203 | 2.37 |
| RIF1         | Protein Coding    | 44 | GC02P151409 | 2.37 |
| CLN3         | Protein Coding    | 49 | GC16M028466 | 2.37 |
| ADAM10       | Protein Coding    | 59 | GC15M058588 | 2.37 |
| ANKRD1       | Protein Coding    | 48 | GC10M090912 | 2.36 |
| PODXL        | Protein Coding    | 47 | GC07M131500 | 2.36 |
| TACSTD2      | Protein Coding    | 48 | GC01M058575 | 2.36 |
| IAPP         | Protein Coding    | 46 | GC12P021354 | 2.36 |
| ARRB1        | Protein Coding    | 50 | GC11M075261 | 2.36 |
| BRAT1        | Protein Coding    | 43 | GC07M002577 | 2.36 |
| EBAG9        | Protein Coding    | 44 | GC08P109536 | 2.36 |
| UBB          | Protein Coding    | 50 | GC17P016301 | 2.36 |
| ABCC4        | Protein Coding    | 53 | GC13M095019 | 2.35 |
| C1S          | Protein Coding    | 53 | GC12P007643 | 2.35 |
| PSMB8        | Protein Coding    | 57 | GC06M032840 | 2.35 |
| CGNL1        | Protein Coding    | 42 | GC15P057375 | 2.35 |
| TCHH         | Protein Coding    | 40 | GC01M152078 | 2.35 |
| TUNAR        | RNA Gene          | 18 | GC14P095876 | 2.35 |
| PINK1-AS     | RNA Gene          | 12 | GC01M020642 | 2.35 |
| LSP1         | Protein Coding    | 47 | GC11P001852 | 2.35 |
| ERVW-1       | Protein Coding    | 37 | GC07M092468 | 2.34 |
| RDX          | Protein Coding    | 56 | GC11M109864 | 2.34 |
| TLR7         | Protein Coding    | 52 | GC0XP012867 | 2.34 |
| EPHA1        | Protein Coding    | 53 | GC07M143390 | 2.34 |
| HDAC3        | Protein Coding    | 56 | GC05M141583 | 2.34 |
| CYP1A2       | Protein Coding    | 53 | GC15P074748 | 2.34 |
| SLC9A1       | Protein Coding    | 57 | GC01M027109 | 2.33 |
| PRKRA        | Protein Coding    | 48 | GC02M178431 | 2.33 |
| ID1          | Protein Coding    | 48 | GC20P031605 | 2.33 |
| SLC29A1      | Protein Coding    | 54 | GC06P044219 | 2.32 |
| NR4A2        | Protein Coding    | 52 | GC02M156324 | 2.32 |
| BDKRB2       | Protein Coding    | 51 | GC14P096205 | 2.32 |
| KLK11        | Protein Coding    | 45 | GC19M051023 | 2.32 |
| RPS6KA3      | Protein Coding    | 59 | GC0XM020149 | 2.32 |
| BCAP31       | Protein Coding    | 48 | GC0XM153701 | 2.31 |
| MSI1         | Protein Coding    | 46 | GC12M120341 | 2.31 |
| UBE3A        | Protein Coding    | 54 | GC15M025333 | 2.31 |
| PAFAH1B1     | Protein Coding    | 53 | GC17P002593 | 2.31 |
| LIG3         | Protein Coding    | 51 | GC17P034980 | 2.31 |
| WNT10A       | Protein Coding    | 53 | GC02P218880 | 2.31 |
| PDK1         | Protein Coding    | 53 | GC02P172555 | 2.31 |
| MIRLET7A1    | RNA Gene          | 21 | GC09P094175 | 2.3  |
| IL23R        | Protein Coding    | 51 | GC01P067138 | 2.3  |
| PITX2        | Protein Coding    | 54 | GC04M110617 | 2.3  |
| AGR2         | Protein Coding    | 46 | GC07M016831 | 2.29 |
| IFT27        | Protein Coding    | 43 | GC22M036759 | 2.29 |

|          |                |    |             |      |
|----------|----------------|----|-------------|------|
| PAK2     | Protein Coding | 52 | GC03P196739 | 2.29 |
| ELAC2    | Protein Coding | 46 | GC17M012991 | 2.29 |
| DDOST    | Protein Coding | 51 | GC01M020651 | 2.29 |
| DLL1     | Protein Coding | 50 | GC06M170282 | 2.28 |
| STK3     | Protein Coding | 52 | GC08M098372 | 2.28 |
| IL18R1   | Protein Coding | 49 | GC02P102345 | 2.28 |
| TUBB2B   | Protein Coding | 51 | GC06M003224 | 2.28 |
| CCR9     | Protein Coding | 46 | GC03P045903 | 2.27 |
| SKI      | Protein Coding | 52 | GC01P002228 | 2.27 |
| TFF3     | Protein Coding | 47 | GC21M042311 | 2.27 |
| TAP2     | Protein Coding | 51 | GC06M032789 | 2.27 |
| FOXC2    | Protein Coding | 50 | GC16P086567 | 2.27 |
| MX1      | Protein Coding | 47 | GC21P041420 | 2.27 |
| MMP8     | Protein Coding | 53 | GC11M102617 | 2.27 |
| TNFAIP6  | Protein Coding | 46 | GC02P151357 | 2.27 |
| HSPB2    | Protein Coding | 46 | GC11P111913 | 2.27 |
| FXYD2    | Protein Coding | 49 | GC11M117724 | 2.26 |
| OGT      | Protein Coding | 51 | GC0XP071534 | 2.26 |
| CD226    | Protein Coding | 48 | GC18M069831 | 2.26 |
| FANCA    | Protein Coding | 54 | GC16M089740 | 2.26 |
| HAS2     | Protein Coding | 45 | GC08M121594 | 2.25 |
| PEG3     | Protein Coding | 45 | GC19M056810 | 2.25 |
| MIR198   | RNA Gene       | 20 | GC03M120395 | 2.25 |
| FOXC1    | Protein Coding | 48 | GC06P001610 | 2.25 |
| ISG15    | Protein Coding | 54 | GC01P001001 | 2.25 |
| LYVE1    | Protein Coding | 48 | GC11M010610 | 2.25 |
| PEPD     | Protein Coding | 51 | GC19M033386 | 2.24 |
| ACKR3    | Protein Coding | 46 | GC02P236537 | 2.24 |
| ZNF365   | Protein Coding | 45 | GC10P062374 | 2.24 |
| KCNN3    | Protein Coding | 48 | GC01M154669 | 2.24 |
| EIF5A    | Protein Coding | 49 | GC17P007306 | 2.23 |
| NDUFB11  | Protein Coding | 46 | GC0XM047142 | 2.23 |
| PTGER4   | Protein Coding | 52 | GC05P040679 | 2.22 |
| ZC4H2    | Protein Coding | 43 | GC0XM064915 | 2.22 |
| FEN1     | Protein Coding | 53 | GC11P061811 | 2.22 |
| S1PR1    | Protein Coding | 51 | GC01P101236 | 2.22 |
| ITGB4    | Protein Coding | 54 | GC17P075721 | 2.22 |
| SMARCB1  | Protein Coding | 51 | GC22P023786 | 2.22 |
| PRRT2    | Protein Coding | 45 | GC16P029811 | 2.22 |
| ALDH9A1  | Protein Coding | 48 | GC01M165632 | 2.22 |
| SAMD9    | Protein Coding | 42 | GC07M093099 | 2.22 |
| XRCC5    | Protein Coding | 50 | GC02P216107 | 2.22 |
| KLF10    | Protein Coding | 48 | GC08M102648 | 2.21 |
| PTTG1    | Protein Coding | 48 | GC05P160422 | 2.21 |
| NR5A2    | Protein Coding | 51 | GC01P199996 | 2.21 |
| MYH8     | Protein Coding | 46 | GC17M010390 | 2.21 |
| PDGFD    | Protein Coding | 50 | GC11M103907 | 2.21 |
| PELP1    | Protein Coding | 45 | GC17M004669 | 2.2  |
| SPRY2    | Protein Coding | 51 | GC13M080335 | 2.2  |
| FOXE1    | Protein Coding | 48 | GC09P097853 | 2.2  |
| JAK1     | Protein Coding | 56 | GC01M064833 | 2.2  |
| CIITA    | Protein Coding | 51 | GC16P010879 | 2.2  |
| PGK1     | Protein Coding | 55 | GC0XP077919 | 2.19 |
| ITGA3    | Protein Coding | 53 | GC17P050055 | 2.19 |
| PREP     | Protein Coding | 48 | GC06M105277 | 2.19 |
| BUB1     | Protein Coding | 55 | GC02M110637 | 2.19 |
| TMPO     | Protein Coding | 51 | GC12P098515 | 2.19 |
| SSRP1    | Protein Coding | 46 | GC11M058187 | 2.19 |
| XPO1     | Protein Coding | 51 | GC02M061445 | 2.19 |
| HSP90AB1 | Protein Coding | 50 | GC06P044246 | 2.19 |
| BLVRB    | Protein Coding | 46 | GC19M040447 | 2.18 |
| TPT1     | Protein Coding | 53 | GC13M045333 | 2.18 |
| CAMK4    | Protein Coding | 52 | GC05P111223 | 2.18 |
| UBE2D1   | Protein Coding | 52 | GC10P058334 | 2.18 |
| GRIA2    | Protein Coding | 55 | GC04P157204 | 2.18 |
| NR1H4    | Protein Coding | 54 | GC12P100473 | 2.18 |
| PUM1     | Protein Coding | 46 | GC01M030931 | 2.17 |
| PRSS2    | Protein Coding | 46 | GC07P144360 | 2.17 |
| RLIM     | Protein Coding | 45 | GC0XM074583 | 2.17 |
| MST1R    | Protein Coding | 54 | GC03M049924 | 2.17 |
| PDPK1    | Protein Coding | 54 | GC16P002537 | 2.17 |
| MIR630   | RNA Gene       | 16 | GC15P072587 | 2.17 |
| ACE2     | Protein Coding | 55 | GC0XM015494 | 2.17 |
| BIRC3    | Protein Coding | 53 | GC11P102317 | 2.17 |
| TGFBR3   | Protein Coding | 52 | GC01M091619 | 2.17 |
| MSMB     | Protein Coding | 46 | GC10M046033 | 2.17 |
| DNA2     | Protein Coding | 48 | GC10M068414 | 2.16 |
| LGALS4   | Protein Coding | 44 | GC19M039159 | 2.16 |
| CHRNA7   | Protein Coding | 52 | GC15P031923 | 2.16 |
| LYST     | Protein Coding | 45 | GC01M235661 | 2.16 |
| MAD2L1   | Protein Coding | 51 | GC04M120055 | 2.15 |
| MIR137   | RNA Gene       | 19 | GC01M098046 | 2.15 |
| ELK1     | Protein Coding | 50 | GC0XM047635 | 2.15 |
| SUMO1    | Protein Coding | 53 | GC02M202206 | 2.15 |
| RPL10    | Protein Coding | 52 | GC0XP154389 | 2.14 |
| HIKESHI  | Protein Coding | 35 | GC11P086303 | 2.14 |
| CCR2     | Protein Coding | 51 | GC03P046356 | 2.14 |
| EDARADD  | Protein Coding | 45 | GC01P236348 | 2.14 |
| NDN      | Protein Coding | 47 | GC15M023686 | 2.14 |
| RIPK2    | Protein Coding | 53 | GC08P089758 | 2.14 |
| GREB1    | Protein Coding | 43 | GC02P011482 | 2.13 |
| AKR1A1   | Protein Coding | 50 | GC01P045550 | 2.13 |
| PSCA     | Protein Coding | 45 | GC08P142670 | 2.13 |
| EIF4EBP1 | Protein Coding | 53 | GC08P038007 | 2.13 |
| TBCE     | Protein Coding | 46 | GC01P235367 | 2.12 |
| ADAMTSL1 | Protein Coding | 48 | GC09P017906 | 2.12 |
| UGT1A6   | Protein Coding | 46 | GC02P233691 | 2.12 |
| SCG5     | Protein Coding | 43 | GC15P032641 | 2.12 |
| BUB1B    | Protein Coding | 56 | GC15P040161 | 2.12 |
| MACROD1  | Protein Coding | 39 | GC11M063998 | 2.12 |

|             |                   |    |             |      |
|-------------|-------------------|----|-------------|------|
| MIR486-1    | RNA Gene          | 16 | GC08M041660 | 2.11 |
| LMOD1       | Protein Coding    | 46 | GC01M201896 | 2.11 |
| MEIS2       | Protein Coding    | 48 | GC15M036889 | 2.11 |
| HTR2B       | Protein Coding    | 48 | GC02M231108 | 2.11 |
| DFFA        | Protein Coding    | 51 | GC01M010516 | 2.11 |
| NID1        | Protein Coding    | 46 | GC01M235975 | 2.11 |
| DLG4        | Protein Coding    | 53 | GC17M007189 | 2.11 |
| MAL         | Protein Coding    | 43 | GC02P095025 | 2.1  |
| AQP3        | Protein Coding    | 53 | GC09M033431 | 2.1  |
| UBTF        | Protein Coding    | 48 | GC17M044205 | 2.1  |
| IL12RB1     | Protein Coding    | 51 | GC19M018030 | 2.1  |
| FCN3        | Protein Coding    | 48 | GC01M027379 | 2.1  |
| NQO2        | Protein Coding    | 51 | GC06P003006 | 2.1  |
| CTHRC1      | Protein Coding    | 46 | GC08P103371 | 2.1  |
| IL18BP      | Protein Coding    | 44 | GC11P071998 | 2.09 |
| RPA1        | Protein Coding    | 51 | GC17P001829 | 2.09 |
| PDE4D       | Protein Coding    | 55 | GC05M058969 | 2.09 |
| PDPN        | Protein Coding    | 46 | GC01P013656 | 2.09 |
| PLEC        | Protein Coding    | 49 | GC08M143916 | 2.09 |
| PRKDC       | Protein Coding    | 56 | GC08M047773 | 2.09 |
| RBL2        | Protein Coding    | 49 | GC16P053467 | 2.09 |
| LMX1B       | Protein Coding    | 50 | GC09P126614 | 2.09 |
| ADCY5       | Protein Coding    | 55 | GC03M123282 | 2.09 |
| SREBF2      | Protein Coding    | 50 | GC22P041833 | 2.09 |
| TAF1        | Protein Coding    | 52 | GC0XP071366 | 2.08 |
| TACC1       | Protein Coding    | 46 | GC08P038728 | 2.08 |
| SLC7A11     | Protein Coding    | 50 | GC04M138164 | 2.08 |
| RGS2        | Protein Coding    | 50 | GC01P192778 | 2.08 |
| SLIT2       | Protein Coding    | 51 | GC04P020625 | 2.08 |
| TOR2A       | Protein Coding    | 42 | GC09M127732 | 2.08 |
| CAPN10      | Protein Coding    | 48 | GC02P240586 | 2.08 |
| LHFPL5      | Protein Coding    | 39 | GC06P043134 | 2.08 |
| SPDEF       | Protein Coding    | 45 | GC06M039640 | 2.07 |
| MIR506      | RNA Gene          | 15 | GC0XM147230 | 2.07 |
| TTF2        | Protein Coding    | 45 | GC01P117060 | 2.07 |
| EFEMP2      | Protein Coding    | 49 | GC11M065867 | 2.07 |
| RPS19       | Protein Coding    | 54 | GC19P041859 | 2.07 |
| ASAH1       | Protein Coding    | 53 | GC08M017958 | 2.07 |
| RRM2        | Protein Coding    | 54 | GC02P010179 | 2.07 |
| ITIH4       | Protein Coding    | 48 | GC03M052812 | 2.07 |
| XRCC6       | Protein Coding    | 52 | GC22P041622 | 2.06 |
| BAG3        | Protein Coding    | 50 | GC10P119651 | 2.06 |
| ATF3        | Protein Coding    | 50 | GC01P212565 | 2.06 |
| ITGB5       | Protein Coding    | 52 | GC03M124761 | 2.06 |
| DEK         | Protein Coding    | 47 | GC06M018224 | 2.06 |
| COL6A3      | Protein Coding    | 50 | GC02M237324 | 2.06 |
| ZP2         | Protein Coding    | 43 | GC16M021198 | 2.06 |
| PLA2G4C     | Protein Coding    | 48 | GC19M048047 | 2.06 |
| OPHN1       | Protein Coding    | 48 | GC0XM068042 | 2.05 |
| CRHR2       | Protein Coding    | 48 | GC07M030651 | 2.05 |
| FABP5       | Protein Coding    | 47 | GC08P081282 | 2.05 |
| RDH12       | Protein Coding    | 52 | GC14P067701 | 2.05 |
| SETDB1      | Protein Coding    | 48 | GC01P150926 | 2.05 |
| THBS2       | Protein Coding    | 51 | GC06M169215 | 2.04 |
| ZNF608      | Protein Coding    | 39 | GC05M124636 | 2.04 |
| PNKD        | Protein Coding    | 48 | GC02P218270 | 2.04 |
| RLBP1       | Protein Coding    | 51 | GC15M089209 | 2.04 |
| CYP2J2      | Protein Coding    | 50 | GC01M059893 | 2.04 |
| EMP2        | Protein Coding    | 49 | GC16M010541 | 2.04 |
| PLXND1      | Protein Coding    | 46 | GC03M129555 | 2.04 |
| MIR133A1    | RNA Gene          | 18 | GC18M021826 | 2.04 |
| SLC6A2      | Protein Coding    | 55 | GC16P055656 | 2.04 |
| TIAM1       | Protein Coding    | 51 | GC21M031118 | 2.03 |
| FANCC       | Protein Coding    | 52 | GC09M095099 | 2.03 |
| OSM         | Protein Coding    | 49 | GC22M030262 | 2.03 |
| KAT2B       | Protein Coding    | 54 | GC03P020081 | 2.03 |
| COL8A2      | Protein Coding    | 47 | GC01M036095 | 2.03 |
| NEDD4L      | Protein Coding    | 53 | GC18P058044 | 2.03 |
| POU1F1      | Protein Coding    | 50 | GC03M087259 | 2.03 |
| MIR148B     | RNA Gene          | 20 | GC12P054337 | 2.03 |
| PCMT1       | Protein Coding    | 46 | GC06P149749 | 2.02 |
| CYP24A1     | Protein Coding    | 53 | GC20M054153 | 2.02 |
| CXCL6       | Protein Coding    | 46 | GC04P073837 | 2.02 |
| PAWR        | Protein Coding    | 45 | GC12M079574 | 2.02 |
| COL6A1      | Protein Coding    | 49 | GC21P045981 | 2.02 |
| NFIB        | Protein Coding    | 48 | GC09M014077 | 2.02 |
| EHMT2       | Protein Coding    | 52 | GC06M031879 | 2.01 |
| SOD3        | Protein Coding    | 45 | GC04P024798 | 2.01 |
| POT1        | Protein Coding    | 48 | GC07M124822 | 2.01 |
| LOC11038695 | Biological Region | 3  | GC15U902412 | 2.01 |
| CLIC4       | Protein Coding    | 45 | GC01P024745 | 2.01 |
| ABCG1       | Protein Coding    | 50 | GC21P042199 | 2    |
| SHMT1       | Protein Coding    | 52 | GC17M018333 | 2    |
| PIP5K1C     | Protein Coding    | 55 | GC19M003631 | 2    |
| GRPR        | Protein Coding    | 49 | GC0XP016141 | 2    |
| TUSC3       | Protein Coding    | 46 | GC08P015417 | 2    |
| KALRN       | Protein Coding    | 49 | GC03P124033 | 2    |
| CR1         | Protein Coding    | 51 | GC01P207496 | 2    |
| LTF         | Protein Coding    | 50 | GC03M046435 | 1.99 |
| RPL27       | Protein Coding    | 48 | GC17P042998 | 1.99 |
| LIN28A      | Protein Coding    | 46 | GC01P026410 | 1.99 |
| IRAK4       | Protein Coding    | 54 | GC12P043758 | 1.99 |
| CSK         | Protein Coding    | 54 | GC15P074782 | 1.98 |
| CASP6       | Protein Coding    | 54 | GC04M109688 | 1.98 |
| MCPH1       | Protein Coding    | 46 | GC08P006406 | 1.98 |
| MIR499A     | RNA Gene          | 21 | GC20P034990 | 1.98 |
| DNM2        | Protein Coding    | 56 | GC19P010689 | 1.98 |
| SHANK3      | Protein Coding    | 48 | GC22P050674 | 1.97 |
| SRSF2       | Protein Coding    | 46 | GC17M076734 | 1.97 |
| ADIPOR2     | Protein Coding    | 48 | GC12P001670 | 1.97 |

|          |                |    |             |      |
|----------|----------------|----|-------------|------|
| ADGRG1   | Protein Coding | 43 | GC16P057610 | 1.96 |
| IGF2BP2  | Protein Coding | 50 | GC03M185643 | 1.96 |
| BNIP3    | Protein Coding | 48 | GC10M131966 | 1.96 |
| DMRT1    | Protein Coding | 46 | GC09P000831 | 1.96 |
| MIR212   | RNA Gene       | 20 | GC17M002050 | 1.96 |
| UFD1     | Protein Coding | 40 | GC22M019450 | 1.96 |
| RBPJ     | Protein Coding | 53 | GC04P026165 | 1.95 |
| HCCS     | Protein Coding | 47 | GC0XP011129 | 1.95 |
| MECOM    | Protein Coding | 54 | GC03M169083 | 1.95 |
| BST2     | Protein Coding | 45 | GC19M017403 | 1.95 |
| LRG1     | Protein Coding | 45 | GC19M004538 | 1.95 |
| RPS7     | Protein Coding | 50 | GC02P003575 | 1.95 |
| MIR30A   | RNA Gene       | 20 | GC06M071403 | 1.94 |
| SEMA4D   | Protein Coding | 51 | GC09M089360 | 1.94 |
| AQP5     | Protein Coding | 52 | GC12P049961 | 1.94 |
| PTAFR    | Protein Coding | 48 | GC01M028161 | 1.94 |
| UBE2I    | Protein Coding | 54 | GC16P001310 | 1.94 |
| UGT1A9   | Protein Coding | 49 | GC02P233671 | 1.94 |
| MTR      | Protein Coding | 53 | GC01P236795 | 1.94 |
| FOLR2    | Protein Coding | 48 | GC11P072216 | 1.94 |
| B9D2     | Protein Coding | 46 | GC19M041354 | 1.94 |
| ING1     | Protein Coding | 50 | GC13P110712 | 1.94 |
| HLA-DRA  | Protein Coding | 53 | GC06P032439 | 1.94 |
| MYO3A    | Protein Coding | 48 | GC10P025934 | 1.93 |
| DNM1     | Protein Coding | 57 | GC09P128203 | 1.93 |
| ENTPD1   | Protein Coding | 53 | GC10P095711 | 1.93 |
| PPIA     | Protein Coding | 53 | GC07P044811 | 1.93 |
| IQGAP1   | Protein Coding | 50 | GC15P090388 | 1.93 |
| COL4A3   | Protein Coding | 52 | GC02P227164 | 1.93 |
| CXCL14   | Protein Coding | 45 | GC05M135617 | 1.93 |
| RPL3     | Protein Coding | 48 | GC22M042887 | 1.93 |
| MIR135A1 | RNA Gene       | 20 | GC03M052296 | 1.93 |
| FGG      | Protein Coding | 54 | GC04M154604 | 1.93 |
| NECTIN2  | Protein Coding | 42 | GC19P044849 | 1.93 |
| GJC1     | Protein Coding | 48 | GC17M044800 | 1.92 |
| GPR4     | Protein Coding | 45 | GC19M045589 | 1.92 |
| MIR24-1  | RNA Gene       | 19 | GC09P095086 | 1.92 |
| LAMC1    | Protein Coding | 49 | GC01P182992 | 1.92 |
| IL27     | Protein Coding | 45 | GC16M028511 | 1.92 |
| RGCC     | Protein Coding | 40 | GC13P041457 | 1.92 |
| MYOCD    | Protein Coding | 46 | GC17P012665 | 1.92 |
| LYN      | Protein Coding | 57 | GC08P055879 | 1.91 |
| HAVCR1   | Protein Coding | 48 | GC05M157007 | 1.91 |
| PEA15    | Protein Coding | 50 | GC01P160205 | 1.91 |
| PDGFC    | Protein Coding | 50 | GC04M156760 | 1.91 |
| GAA      | Protein Coding | 54 | GC17P080101 | 1.91 |
| FANCD2   | Protein Coding | 52 | GC03P010026 | 1.91 |
| UTS2     | Protein Coding | 46 | GC01M007904 | 1.91 |
| IRF2BPL  | Protein Coding | 40 | GC14M077024 | 1.9  |
| KIF2A    | Protein Coding | 48 | GC05P062306 | 1.9  |
| IRF1     | Protein Coding | 54 | GC05M132481 | 1.9  |
| PRDX1    | Protein Coding | 56 | GC01M045511 | 1.9  |
| PSD      | Protein Coding | 45 | GC10M102403 | 1.9  |
| CFB      | Protein Coding | 52 | GC06P031945 | 1.9  |
| IHH      | Protein Coding | 53 | GC02M219054 | 1.9  |
| REL      | Protein Coding | 53 | GC02P060881 | 1.9  |
| HIPK2    | Protein Coding | 51 | GC07M139561 | 1.9  |
| TRIM24   | Protein Coding | 50 | GC07P138460 | 1.9  |
| ATP8B1   | Protein Coding | 46 | GC18M057646 | 1.89 |
| RECQL    | Protein Coding | 47 | GC12M021468 | 1.89 |
| F13A1    | Protein Coding | 51 | GC06M006144 | 1.89 |
| NOL3     | Protein Coding | 48 | GC16P067207 | 1.89 |
| SMARCE1  | Protein Coding | 51 | GC17M040624 | 1.88 |
| RCAN1    | Protein Coding | 49 | GC21M034513 | 1.88 |
| FTH1     | Protein Coding | 57 | GC11M061959 | 1.88 |
| PRPF8    | Protein Coding | 48 | GC17M001650 | 1.88 |
| MAP3K14  | Protein Coding | 50 | GC17M045263 | 1.88 |
| PRMT1    | Protein Coding | 54 | GC19P049675 | 1.88 |
| HNMT     | Protein Coding | 50 | GC02P137964 | 1.88 |
| ACLY     | Protein Coding | 51 | GC17M041866 | 1.88 |
| SULT1E1  | Protein Coding | 50 | GC04M069841 | 1.87 |
| TBXAS1   | Protein Coding | 56 | GC07P139777 | 1.87 |
| TLR8     | Protein Coding | 53 | GC0XP012924 | 1.87 |
| SALL2    | Protein Coding | 48 | GC14M021521 | 1.87 |
| NINL     | Protein Coding | 42 | GC20M025452 | 1.87 |
| ADNP     | Protein Coding | 46 | GC20M050888 | 1.87 |
| RAP1A    | Protein Coding | 53 | GC01P111542 | 1.87 |
| FOSL2    | Protein Coding | 48 | GC02P028392 | 1.87 |
| ALDH5A1  | Protein Coding | 53 | GC06P024444 | 1.87 |
| EEF1A1   | Protein Coding | 50 | GC06M073515 | 1.86 |
| TIPARP   | Protein Coding | 40 | GC03P156673 | 1.86 |
| UCN      | Protein Coding | 44 | GC02M027273 | 1.86 |
| NR2F2    | Protein Coding | 54 | GC15P096325 | 1.86 |
| UBR5     | Protein Coding | 48 | GC08M102252 | 1.86 |
| YWHAQ    | Protein Coding | 53 | GC02M009641 | 1.86 |
| TNFRSF4  | Protein Coding | 50 | GC01M001211 | 1.86 |
| MDK      | Protein Coding | 50 | GC11P046402 | 1.86 |
| FTMT     | Protein Coding | 42 | GC05P121851 | 1.86 |
| ATP6AP2  | Protein Coding | 50 | GC0XP040582 | 1.86 |
| ROS1     | Protein Coding | 51 | GC06M117287 | 1.85 |
| NSD1     | Protein Coding | 49 | GC05P177134 | 1.85 |
| ANGPTL2  | Protein Coding | 42 | GC09M127087 | 1.85 |
| GDF2     | Protein Coding | 49 | GC10P047322 | 1.85 |
| FGR      | Protein Coding | 55 | GC01M027622 | 1.85 |
| TRA2B    | Protein Coding | 45 | GC03M185914 | 1.85 |
| PEBP1    | Protein Coding | 51 | GC12P118135 | 1.85 |
| HES1     | Protein Coding | 50 | GC03P194136 | 1.85 |
| PLAA     | Protein Coding | 48 | GC09M026903 | 1.85 |
| CD52     | Protein Coding | 42 | GC01P026317 | 1.85 |
| SNW1     | Protein Coding | 48 | GC14M077717 | 1.84 |

|          |                |    |             |      |
|----------|----------------|----|-------------|------|
| PER1     | Protein Coding | 48 | GC17M008624 | 1.84 |
| RPS14    | Protein Coding | 50 | GC05M150443 | 1.84 |
| PTGES    | Protein Coding | 47 | GC09M129738 | 1.84 |
| DNMT3L   | Protein Coding | 48 | GC21M044246 | 1.84 |
| GALNT3   | Protein Coding | 51 | GC02M165747 | 1.84 |
| SERPIND1 | Protein Coding | 52 | GC22P020773 | 1.83 |
| RYK      | Protein Coding | 48 | GC03M134065 | 1.83 |
| EIF2S1   | Protein Coding | 51 | GC14P067359 | 1.83 |
| OSMR     | Protein Coding | 51 | GC05P038845 | 1.83 |
| CXCL16   | Protein Coding | 45 | GC17M004733 | 1.83 |
| CHL1     | Protein Coding | 46 | GC03P000213 | 1.82 |
| WDR62    | Protein Coding | 43 | GC19P036054 | 1.82 |
| TNXA     | Pseudogene     | 29 | GC06M032182 | 1.82 |
| ST3GAL4  | Protein Coding | 48 | GC11P126355 | 1.82 |
| MNX1     | Protein Coding | 47 | GC07M156994 | 1.82 |
| PRPF4    | Protein Coding | 48 | GC09P113275 | 1.82 |
| NME2     | Protein Coding | 53 | GC17P051155 | 1.81 |
| SLAMF1   | Protein Coding | 46 | GC01M160577 | 1.81 |
| STK4     | Protein Coding | 55 | GC20P044966 | 1.81 |
| IL16     | Protein Coding | 49 | GC15P081159 | 1.81 |
| F2RL1    | Protein Coding | 52 | GC05P076818 | 1.81 |
| AP3B2    | Protein Coding | 48 | GC15M082675 | 1.8  |
| FABP3    | Protein Coding | 50 | GC01M031365 | 1.8  |
| CBR1     | Protein Coding | 53 | GC21P036069 | 1.8  |
| HSPB6    | Protein Coding | 45 | GC19M039131 | 1.8  |
| EHF      | Protein Coding | 47 | GC11P034599 | 1.8  |
| RAD52    | Protein Coding | 48 | GC12M000912 | 1.79 |
| DNTT     | Protein Coding | 47 | GC10P096304 | 1.79 |
| CD200    | Protein Coding | 45 | GC03P112332 | 1.79 |
| OAS1     | Protein Coding | 52 | GC12P112906 | 1.79 |
| MAPK7    | Protein Coding | 54 | GC17P019379 | 1.79 |
| FCGR1A   | Protein Coding | 48 | GC01P149754 | 1.79 |
| LCP1     | Protein Coding | 46 | GC13M046132 | 1.79 |
| TUBGCP6  | Protein Coding | 45 | GC22M050217 | 1.79 |
| CCNH     | Protein Coding | 51 | GC05M087377 | 1.78 |
| HSD17B13 | Protein Coding | 42 | GC04M087303 | 1.78 |
| NCL      | Protein Coding | 47 | GC02M231453 | 1.78 |
| CD82     | Protein Coding | 49 | GC11P044586 | 1.78 |
| HSD11B2  | Protein Coding | 53 | GC16P067465 | 1.78 |
| RALA     | Protein Coding | 52 | GC07P039663 | 1.78 |
| LDLRAP1  | Protein Coding | 48 | GC01P025574 | 1.78 |
| EIF6     | Protein Coding | 46 | GC20M035278 | 1.77 |
| GJA5     | Protein Coding | 51 | GC01M147756 | 1.77 |
| TFPI     | Protein Coding | 51 | GC02M187464 | 1.77 |
| GUSB     | Protein Coding | 54 | GC07M065960 | 1.77 |
| NR1D1    | Protein Coding | 54 | GC17M040092 | 1.77 |
| KLKB1    | Protein Coding | 54 | GC04P186208 | 1.77 |
| PROK1    | Protein Coding | 42 | GC01P110451 | 1.77 |
| MAP3K7   | Protein Coding | 57 | GC06M090513 | 1.77 |
| TNFRSF14 | Protein Coding | 50 | GC01P002555 | 1.77 |
| GSK3A    | Protein Coding | 55 | GC19M042230 | 1.76 |
| COPS5    | Protein Coding | 48 | GC08M067077 | 1.76 |
| CAST     | Protein Coding | 51 | GC05P096525 | 1.76 |
| TUBA4A   | Protein Coding | 53 | GC02M219249 | 1.76 |
| FKBP5    | Protein Coding | 52 | GC06M039650 | 1.76 |
| CCL19    | Protein Coding | 48 | GC09M034692 | 1.76 |
| PADI4    | Protein Coding | 50 | GC01P017308 | 1.76 |
| PIN1     | Protein Coding | 52 | GC19P009835 | 1.76 |
| IGFL3    | Protein Coding | 37 | GC19M046120 | 1.76 |
| BACH1    | Protein Coding | 46 | GC21P029194 | 1.75 |
| SIRT2    | Protein Coding | 53 | GC19M038878 | 1.75 |
| CSNK1E   | Protein Coding | 54 | GC22M042921 | 1.75 |
| CNTF     | Protein Coding | 48 | GC11P058641 | 1.75 |
| CXCR6    | Protein Coding | 46 | GC03P045982 | 1.75 |
| WDR1     | Protein Coding | 43 | GC04M010075 | 1.75 |
| OTUD7B   | Protein Coding | 40 | GC01M149937 | 1.75 |
| PTGES2   | Protein Coding | 48 | GC09M128120 | 1.75 |
| GRM5     | Protein Coding | 53 | GC11M088425 | 1.75 |
| CALB1    | Protein Coding | 48 | GC08M090058 | 1.74 |
| CTBP2    | Protein Coding | 50 | GC10M124984 | 1.74 |
| BCL3     | Protein Coding | 48 | GC19P044747 | 1.74 |
| PER3     | Protein Coding | 48 | GC01P007844 | 1.74 |
| BACH2    | Protein Coding | 47 | GC06M089926 | 1.74 |
| RGS10    | Protein Coding | 48 | GC10M119499 | 1.74 |
| SET      | Protein Coding | 53 | GC09P128684 | 1.74 |
| SHOX2    | Protein Coding | 43 | GC03M158095 | 1.74 |
| LGALS9   | Protein Coding | 44 | GC17P027629 | 1.74 |
| BCKDHB   | Protein Coding | 50 | GC06P080106 | 1.74 |
| MIR107   | RNA Gene       | 20 | GC10M089604 | 1.74 |
| ARHGEF2  | Protein Coding | 51 | GC01M155946 | 1.73 |
| TOPBP1   | Protein Coding | 47 | GC03M133600 | 1.73 |
| SLC22A2  | Protein Coding | 51 | GC06M160173 | 1.73 |
| TMCO1    | Protein Coding | 45 | GC01M165724 | 1.73 |
| KLF6     | Protein Coding | 50 | GC10M003812 | 1.73 |
| KLK15    | Protein Coding | 47 | GC19M050825 | 1.73 |
| ALG13    | Protein Coding | 43 | GC0XP111665 | 1.73 |
| CD163    | Protein Coding | 49 | GC12M007518 | 1.72 |
| SERBP1   | Protein Coding | 40 | GC01M067407 | 1.72 |
| FOXQ1    | Protein Coding | 39 | GC06P001312 | 1.72 |
| EFNA1    | Protein Coding | 48 | GC01P155127 | 1.72 |
| CTCFL    | Protein Coding | 45 | GC20M057495 | 1.72 |
| MSBP1    | Protein Coding | 6  | GC00U990213 | 1.72 |
| GZMA     | Protein Coding | 48 | GC05P055102 | 1.72 |
| HLA-DMB  | Protein Coding | 46 | GC06M032903 | 1.71 |
| SLC4A1   | Protein Coding | 54 | GC17M044249 | 1.71 |
| SELENOP  | Protein Coding | 34 | GC05M042800 | 1.71 |
| MIR7-1   | RNA Gene       | 18 | GC09M083970 | 1.71 |
| IL32     | Protein Coding | 46 | GC16P003831 | 1.71 |
| TBX4     | Protein Coding | 48 | GC17P061451 | 1.71 |
| MUTYH    | Protein Coding | 50 | GC01M045329 | 1.71 |

|          |                |    |             |      |
|----------|----------------|----|-------------|------|
| CA12     | Protein Coding | 53 | GC15M063321 | 1.71 |
| SLC5A5   | Protein Coding | 50 | GC19P020626 | 1.71 |
| PDCD5    | Protein Coding | 46 | GC19P032581 | 1.71 |
| NEB      | Protein Coding | 48 | GC02M151485 | 1.71 |
| ADAMTS1  | Protein Coding | 50 | GC21M026835 | 1.7  |
| NR2F1    | Protein Coding | 51 | GC05P093583 | 1.7  |
| HBA2     | Protein Coding | 48 | GC16P000576 | 1.7  |
| MIR138-1 | RNA Gene       | 20 | GC03P044159 | 1.7  |
| PCBD1    | Protein Coding | 52 | GC10M070882 | 1.7  |
| PLD2     | Protein Coding | 53 | GC17P004808 | 1.7  |
| MICA     | Protein Coding | 45 | GC06P031399 | 1.7  |
| HCFC1    | Protein Coding | 52 | GC0XM153947 | 1.7  |
| MIR216A  | RNA Gene       | 21 | GC02M055988 | 1.7  |
| HTR4     | Protein Coding | 50 | GC05M148451 | 1.7  |
| EPB41L1  | Protein Coding | 50 | GC20P036064 | 1.7  |
| MT2A     | Protein Coding | 48 | GC16P056624 | 1.69 |
| UBE2B    | Protein Coding | 52 | GC05P134371 | 1.69 |
| CA6      | Protein Coding | 48 | GC01P009005 | 1.69 |
| DDX3X    | Protein Coding | 54 | GC0XP041333 | 1.69 |
| HPGD     | Protein Coding | 54 | GC04M174490 | 1.69 |
| RHOB     | Protein Coding | 48 | GC02P020447 | 1.69 |
| FYN      | Protein Coding | 55 | GC06M111660 | 1.69 |
| RARRES2  | Protein Coding | 45 | GC07M150333 | 1.68 |
| DCAF1    | Protein Coding | 35 | GC03M051395 | 1.68 |
| FANCI    | Protein Coding | 48 | GC15P089243 | 1.68 |
| PLA2G1B  | Protein Coding | 53 | GC12M120322 | 1.68 |
| SIK2     | Protein Coding | 50 | GC11P111605 | 1.68 |
| ARF1     | Protein Coding | 52 | GC01P228082 | 1.68 |
| FOXF2    | Protein Coding | 44 | GC06P001390 | 1.67 |
| HOXA7    | Protein Coding | 46 | GC07M027153 | 1.67 |
| MMP12    | Protein Coding | 50 | GC11M102862 | 1.67 |
| FUT3     | Protein Coding | 48 | GC19M005843 | 1.66 |
| JUNB     | Protein Coding | 48 | GC19P012791 | 1.66 |
| UBE2A    | Protein Coding | 51 | GC0XP119574 | 1.66 |
| MIR9-2   | RNA Gene       | 20 | GC05M088666 | 1.66 |
| SKAP1    | Protein Coding | 46 | GC17M048133 | 1.66 |
| CD248    | Protein Coding | 45 | GC11M066314 | 1.65 |
| TET2     | Protein Coding | 50 | GC04P105145 | 1.65 |
| LAMTOR5  | Protein Coding | 42 | GC01M110401 | 1.65 |
| FSTL3    | Protein Coding | 45 | GC19P000676 | 1.65 |
| COX7B    | Protein Coding | 48 | GC0XP077899 | 1.65 |
| NRP2     | Protein Coding | 48 | GC02P205681 | 1.65 |
| FGB      | Protein Coding | 53 | GC04P154564 | 1.65 |
| TIMELESS | Protein Coding | 45 | GC12M056416 | 1.65 |
| CRKL     | Protein Coding | 53 | GC22P020917 | 1.65 |
| MIR138-2 | RNA Gene       | 21 | GC16P056859 | 1.64 |
| DNAJC15  | Protein Coding | 43 | GC13P043023 | 1.64 |
| TRIB2    | Protein Coding | 43 | GC02P012706 | 1.64 |
| FZD5     | Protein Coding | 53 | GC02M207762 | 1.64 |
| HTR2C    | Protein Coding | 53 | GC0XP114584 | 1.64 |
| SPHK1    | Protein Coding | 53 | GC17P076376 | 1.63 |
| ARHGDIA  | Protein Coding | 53 | GC17M081867 | 1.63 |
| MFAP5    | Protein Coding | 46 | GC12M008637 | 1.63 |
| MIR197   | RNA Gene       | 19 | GC01P109549 | 1.63 |
| LAMA3    | Protein Coding | 51 | GC18P023689 | 1.63 |
| ABCA2    | Protein Coding | 47 | GC09M137007 | 1.63 |
| CYP2A6   | Protein Coding | 54 | GC19M040843 | 1.63 |
| GAL3ST1  | Protein Coding | 41 | GC22M030554 | 1.63 |
| GSTZ1    | Protein Coding | 47 | GC14P077320 | 1.63 |
| SLC1A1   | Protein Coding | 54 | GC09P004490 | 1.63 |
| NCF4     | Protein Coding | 54 | GC22P036860 | 1.63 |
| PTGER3   | Protein Coding | 53 | GC01M070852 | 1.63 |
| EPB41L3  | Protein Coding | 48 | GC18M005382 | 1.62 |
| LY75     | Protein Coding | 44 | GC02M159803 | 1.62 |
| HLA-E    | Protein Coding | 46 | GC06P032449 | 1.62 |
| EIF3A    | Protein Coding | 47 | GC10M119034 | 1.62 |
| ABI1     | Protein Coding | 46 | GC10M026746 | 1.62 |
| LOXL2    | Protein Coding | 51 | GC08M023296 | 1.62 |
| DOCK4    | Protein Coding | 45 | GC07M111726 | 1.62 |
| MICU1    | Protein Coding | 45 | GC10M072367 | 1.62 |
| LAMB2    | Protein Coding | 50 | GC03M049121 | 1.62 |
| HELQ     | Protein Coding | 43 | GC04M083407 | 1.61 |
| CCKBR    | Protein Coding | 50 | GC11P006280 | 1.61 |
| GABPA    | Protein Coding | 45 | GC21P025734 | 1.61 |
| MTERF1   | Protein Coding | 38 | GC07M091692 | 1.61 |
| AIF1     | Protein Coding | 45 | GC06P032498 | 1.61 |
| MAP3K4   | Protein Coding | 49 | GC06P160991 | 1.61 |
| SEMA3C   | Protein Coding | 49 | GC07M080742 | 1.61 |
| NEDD9    | Protein Coding | 47 | GC06M011183 | 1.61 |
| DCTN2    | Protein Coding | 47 | GC12M057530 | 1.61 |
| BCL2A1   | Protein Coding | 47 | GC15M079961 | 1.61 |
| ZNF318   | Protein Coding | 41 | GC06M043394 | 1.6  |
| FGF14    | Protein Coding | 50 | GC13M101710 | 1.6  |
| LRP5     | Protein Coding | 55 | GC11P068330 | 1.6  |
| EFHC2    | Protein Coding | 40 | GC0XM044146 | 1.6  |
| RPS4Y1   | Protein Coding | 39 | GC0YP002841 | 1.6  |
| TDP1     | Protein Coding | 51 | GC14P089954 | 1.6  |
| PLD1     | Protein Coding | 55 | GC03M171600 | 1.6  |
| CHRNA3   | Protein Coding | 50 | GC15M078594 | 1.6  |
| ADIPOR1  | Protein Coding | 51 | GC01M202940 | 1.6  |
| ADRM1    | Protein Coding | 45 | GC20P062302 | 1.6  |
| HPN      | Protein Coding | 48 | GC19P035040 | 1.6  |
| RHOBTB2  | Protein Coding | 45 | GC08P022987 | 1.59 |
| IGF2BP1  | Protein Coding | 46 | GC17P048997 | 1.59 |
| PRDM1    | Protein Coding | 51 | GC06P106086 | 1.59 |
| MIR129-2 | RNA Gene       | 18 | GC11P043626 | 1.59 |
| CASP4    | Protein Coding | 52 | GC11M104942 | 1.59 |
| HK2      | Protein Coding | 53 | GC02P074796 | 1.59 |
| CSNK1D   | Protein Coding | 57 | GC17M082239 | 1.59 |
| C1RL     | Protein Coding | 43 | GC12M007099 | 1.59 |

|             |                |    |             |      |
|-------------|----------------|----|-------------|------|
| UIMC1       | Protein Coding | 47 | GC05M176905 | 1.59 |
| DNAJB11     | Protein Coding | 45 | GC03P186567 | 1.58 |
| TLR1        | Protein Coding | 54 | GC04M038797 | 1.58 |
| UBE2D2      | Protein Coding | 51 | GC05P139524 | 1.58 |
| COL1A2      | Protein Coding | 53 | GC07P094394 | 1.58 |
| LINGO1      | Protein Coding | 49 | GC15M077613 | 1.58 |
| WNT10B      | Protein Coding | 55 | GC12M048965 | 1.58 |
| CARTPT      | Protein Coding | 49 | GC05P071719 | 1.57 |
| PALM2-AKAP1 | Protein Coding | 31 | GC09P109780 | 1.57 |
| LATS2       | Protein Coding | 50 | GC13M020973 | 1.57 |
| SFRP1       | Protein Coding | 50 | GC08M041238 | 1.57 |
| E2F5        | Protein Coding | 46 | GC08P085177 | 1.57 |
| TRPC3       | Protein Coding | 54 | GC04M121879 | 1.57 |
| MIR196A1    | RNA Gene       | 21 | GC17M048632 | 1.57 |
| DROSHA      | Protein Coding | 47 | GC05M031401 | 1.57 |
| NISCH       | Protein Coding | 47 | GC03P052489 | 1.57 |
| COL11A2     | Protein Coding | 51 | GC06M033162 | 1.57 |
| CBX5        | Protein Coding | 50 | GC12M054230 | 1.56 |
| NDP         | Protein Coding | 50 | GC0XM043948 | 1.56 |
| JAM3        | Protein Coding | 50 | GC11P134068 | 1.56 |
| PHGDH       | Protein Coding | 56 | GC01P119660 | 1.56 |
| LTB4R2      | Protein Coding | 47 | GC14P024633 | 1.56 |
| MAPKAPK3    | Protein Coding | 56 | GC03P050648 | 1.56 |
| SLC25A1     | Protein Coding | 53 | GC22M019163 | 1.56 |
| GSTO1       | Protein Coding | 50 | GC10P104235 | 1.56 |
| TNNI2       | Protein Coding | 51 | GC11P001839 | 1.55 |
| TTC28       | Protein Coding | 40 | GC22M027978 | 1.55 |
| ASPM        | Protein Coding | 43 | GC01M197053 | 1.55 |
| BGN         | Protein Coding | 49 | GC0XP153494 | 1.55 |
| SLC3A2      | Protein Coding | 48 | GC11P062874 | 1.55 |
| BCOR        | Protein Coding | 47 | GC0XM040049 | 1.55 |
| ITGA2       | Protein Coding | 52 | GC05P052989 | 1.55 |
| SUZ12       | Protein Coding | 45 | GC17P031937 | 1.55 |
| CLTC        | Protein Coding | 54 | GC17P059619 | 1.55 |
| CAMK2D      | Protein Coding | 55 | GC04M113452 | 1.55 |
| EPHB2       | Protein Coding | 57 | GC01P022710 | 1.55 |
| RRM1        | Protein Coding | 54 | GC11P004115 | 1.55 |
| PRKCSH      | Protein Coding | 50 | GC19P011435 | 1.55 |
| NCOA4       | Protein Coding | 45 | GC10M046005 | 1.54 |
| PPP2CA      | Protein Coding | 54 | GC05M134194 | 1.54 |
| 5-Mar       | Protein Coding | 41 | GC10P092291 | 1.54 |
| XAF1        | Protein Coding | 46 | GC17P006757 | 1.54 |
| FAT2        | Protein Coding | 42 | GC05M151504 | 1.54 |
| LAMP2       | Protein Coding | 51 | GC0XM120426 | 1.53 |
| IL1R2       | Protein Coding | 51 | GC02P101991 | 1.53 |
| TIMP4       | Protein Coding | 45 | GC03M012153 | 1.53 |
| GUCY2C      | Protein Coding | 52 | GC12M014612 | 1.53 |
| AFDN        | Protein Coding | 40 | GC06P167827 | 1.53 |
| TK1         | Protein Coding | 52 | GC17M078175 | 1.53 |
| GABRB2      | Protein Coding | 54 | GC05M161288 | 1.53 |
| DHODH       | Protein Coding | 51 | GC16P072042 | 1.53 |
| GCLM        | Protein Coding | 47 | GC01M093885 | 1.52 |
| PIKFYVE     | Protein Coding | 54 | GC02P208266 | 1.52 |
| CCNB2       | Protein Coding | 50 | GC15P059105 | 1.52 |
| MACC1       | Protein Coding | 42 | GC07M020140 | 1.52 |
| DUSP4       | Protein Coding | 49 | GC08M029334 | 1.52 |
| PSMD10      | Protein Coding | 46 | GC0XM108084 | 1.52 |
| GRHL2       | Protein Coding | 47 | GC08P101492 | 1.52 |
| ADCY6       | Protein Coding | 54 | GC12M048766 | 1.52 |
| SMAD6       | Protein Coding | 51 | GC15P066702 | 1.52 |
| SON         | Protein Coding | 45 | GC21P033542 | 1.52 |
| EFNB2       | Protein Coding | 51 | GC13M106489 | 1.52 |
| CBX2        | Protein Coding | 48 | GC17P079778 | 1.52 |
| APOBEC3G    | Protein Coding | 48 | GC22P039078 | 1.52 |
| ABCC3       | Protein Coding | 53 | GC17P050634 | 1.52 |
| APLNR       | Protein Coding | 48 | GC11M057233 | 1.52 |
| SMARCA1     | Protein Coding | 45 | GC0XM129447 | 1.52 |
| HNF1A-AS1   | RNA Gene       | 18 | GC12M120987 | 1.52 |
| TYRP1       | Protein Coding | 53 | GC09P012683 | 1.51 |
| PAX1        | Protein Coding | 48 | GC20P021705 | 1.51 |
| TXNIP       | Protein Coding | 45 | GC01M145992 | 1.51 |
| CHD3        | Protein Coding | 46 | GC17P007886 | 1.51 |
| CPB2        | Protein Coding | 51 | GC13M046053 | 1.51 |
| GPR179      | Protein Coding | 41 | GC17M038325 | 1.51 |
| CARD10      | Protein Coding | 46 | GC22M042874 | 1.51 |
| DFFB        | Protein Coding | 48 | GC01P003797 | 1.5  |
| RHEB        | Protein Coding | 54 | GC07M151466 | 1.5  |
| LOXL1       | Protein Coding | 49 | GC15P073925 | 1.5  |
| AHSG        | Protein Coding | 50 | GC03P186612 | 1.5  |
| FUT1        | Protein Coding | 47 | GC19M048748 | 1.5  |
| BCL2L2      | Protein Coding | 49 | GC14P024635 | 1.5  |
| SATB1       | Protein Coding | 48 | GC03M018364 | 1.5  |
| HYAL1       | Protein Coding | 52 | GC03M050299 | 1.5  |
| STC2        | Protein Coding | 45 | GC05M173314 | 1.5  |
| RAP1B       | Protein Coding | 52 | GC12P068520 | 1.5  |
| HNRNPDL     | Protein Coding | 45 | GC04M082422 | 1.49 |
| SIX5        | Protein Coding | 45 | GC19M045764 | 1.49 |
| MMP15       | Protein Coding | 51 | GC16P058025 | 1.49 |
| CSH1        | Protein Coding | 43 | GC17M063894 | 1.49 |
| KLF5        | Protein Coding | 50 | GC13P073054 | 1.49 |
| TERF1       | Protein Coding | 48 | GC08P073003 | 1.49 |
| CD6         | Protein Coding | 46 | GC11P060990 | 1.49 |
| PANX1       | Protein Coding | 48 | GC11P094128 | 1.49 |
| UBQLN4      | Protein Coding | 46 | GC01M156033 | 1.49 |
| MEST        | Protein Coding | 45 | GC07P130486 | 1.49 |
| TUBB2A      | Protein Coding | 51 | GC06M003153 | 1.49 |
| CCL20       | Protein Coding | 50 | GC02P227813 | 1.49 |
| MGAT3       | Protein Coding | 44 | GC22P039447 | 1.49 |
| RPTOR       | Protein Coding | 50 | GC17P080544 | 1.49 |
| NUPR1       | Protein Coding | 42 | GC16M028548 | 1.49 |















|            |                |    |             |      |
|------------|----------------|----|-------------|------|
| BCAM       | Protein Coding | 46 | GC19P044810 | 0.9  |
| OAS3       | Protein Coding | 45 | GC12P112938 | 0.9  |
| GULP1      | Protein Coding | 43 | GC02P188291 | 0.9  |
| POLR2K     | Protein Coding | 43 | GC08P100150 | 0.9  |
| MIR545     | RNA Gene       | 14 | GC0XM074287 | 0.9  |
| EED        | Protein Coding | 48 | GC11P086244 | 0.9  |
| RAB18      | Protein Coding | 45 | GC10P027504 | 0.9  |
| PHACTR1    | Protein Coding | 43 | GC06P012717 | 0.9  |
| HCK        | Protein Coding | 57 | GC20P032052 | 0.9  |
| NONO       | Protein Coding | 51 | GC0XP071283 | 0.9  |
| POLD1      | Protein Coding | 52 | GC19P050385 | 0.89 |
| UNC13D     | Protein Coding | 50 | GC17M075827 | 0.89 |
| TCN1       | Protein Coding | 46 | GC11M059871 | 0.89 |
| PAK5       | Protein Coding | 40 | GC20M009538 | 0.89 |
| MYOC       | Protein Coding | 48 | GC01M171604 | 0.89 |
| PLD3       | Protein Coding | 47 | GC19P040348 | 0.89 |
| KDM4C      | Protein Coding | 47 | GC09P006720 | 0.89 |
| CKMT2      | Protein Coding | 48 | GC05P081232 | 0.89 |
| CEBPD      | Protein Coding | 43 | GC08M047759 | 0.89 |
| POU2AF1    | Protein Coding | 43 | GC11M111352 | 0.89 |
| HHIP       | Protein Coding | 48 | GC04P144645 | 0.89 |
| CNN1       | Protein Coding | 47 | GC19P011539 | 0.89 |
| CLCA1      | Protein Coding | 46 | GC01P086468 | 0.89 |
| PMEL       | Protein Coding | 43 | GC12M055954 | 0.89 |
| LARP1      | Protein Coding | 41 | GC05P154682 | 0.89 |
| MIR147B    | RNA Gene       | 18 | GC15P045433 | 0.89 |
| TACC3      | Protein Coding | 48 | GC04P001723 | 0.88 |
| FUT8       | Protein Coding | 50 | GC14P065411 | 0.88 |
| CLIP1      | Protein Coding | 50 | GC12M122271 | 0.88 |
| DHRS4      | Protein Coding | 49 | GC14P023953 | 0.88 |
| CLCN3      | Protein Coding | 48 | GC04P169612 | 0.88 |
| NMB        | Protein Coding | 48 | GC15M084655 | 0.88 |
| FSTL1      | Protein Coding | 47 | GC03M120392 | 0.88 |
| ADAM19     | Protein Coding | 47 | GC05M157455 | 0.88 |
| KCNK10     | Protein Coding | 46 | GC14M088180 | 0.88 |
| AKAP12     | Protein Coding | 46 | GC06P151239 | 0.88 |
| SLX4       | Protein Coding | 45 | GC16M003581 | 0.88 |
| MOAP1      | Protein Coding | 42 | GC14M093182 | 0.88 |
| DESI2      | Protein Coding | 40 | GC01P244652 | 0.88 |
| MIR187     | RNA Gene       | 18 | GC18M035904 | 0.88 |
| ARFGAP3    | Protein Coding | 46 | GC22M042796 | 0.88 |
| FKBP6      | Protein Coding | 45 | GC07P073328 | 0.88 |
| SNX10      | Protein Coding | 46 | GC07P026291 | 0.87 |
| LCP2       | Protein Coding | 49 | GC05M170246 | 0.87 |
| DMP1       | Protein Coding | 48 | GC04P087650 | 0.87 |
| CDCA3      | Protein Coding | 43 | GC12M006844 | 0.87 |
| ERVMER34-1 | Protein Coding | 34 | GC04M052722 | 0.87 |
| MIR654     | RNA Gene       | 18 | GC14P103860 | 0.87 |
| MTRR       | Protein Coding | 49 | GC05P007851 | 0.87 |
| MIR551B    | RNA Gene       | 16 | GC03P168551 | 0.87 |
| CYP4V2     | Protein Coding | 48 | GC04P186191 | 0.87 |
| LSM2       | Protein Coding | 45 | GC06M032172 | 0.87 |
| RXRG       | Protein Coding | 47 | GC01M165401 | 0.87 |
| KHDRBS1    | Protein Coding | 46 | GC01P031981 | 0.87 |
| DAPK2      | Protein Coding | 46 | GC15M063907 | 0.87 |
| DPY30      | Protein Coding | 42 | GC02M031867 | 0.87 |
| MMS19      | Protein Coding | 40 | GC10M097458 | 0.87 |
| TMOD1      | Protein Coding | 43 | GC09P097501 | 0.86 |
| PACRG      | Protein Coding | 43 | GC06P162727 | 0.86 |
| SIRPA      | Protein Coding | 50 | GC20P001894 | 0.86 |
| MMRN1      | Protein Coding | 44 | GC04P089879 | 0.86 |
| AP2A1      | Protein Coding | 43 | GC19P049766 | 0.86 |
| GDF1       | Protein Coding | 43 | GC19M018843 | 0.86 |
| PHLDA2     | Protein Coding | 43 | GC11M002928 | 0.86 |
| CHRND      | Protein Coding | 49 | GC02P232525 | 0.86 |
| TRAF1      | Protein Coding | 49 | GC09M120902 | 0.86 |
| ARHGAP1    | Protein Coding | 48 | GC11M056007 | 0.86 |
| SRI        | Protein Coding | 48 | GC07M088205 | 0.86 |
| FUCA2      | Protein Coding | 46 | GC06M143494 | 0.86 |
| NCR3       | Protein Coding | 45 | GC06M031588 | 0.86 |
| CUL9       | Protein Coding | 43 | GC06P043182 | 0.86 |
| MARK1      | Protein Coding | 47 | GC01P220528 | 0.86 |
| HRH4       | Protein Coding | 48 | GC18P024460 | 0.86 |
| ATAD3B     | Protein Coding | 42 | GC01P001472 | 0.85 |
| KDM4B      | Protein Coding | 50 | GC19P004969 | 0.85 |
| SERPINA5   | Protein Coding | 49 | GC14P094563 | 0.85 |
| CCNK       | Protein Coding | 48 | GC14P099483 | 0.85 |
| CTNND2     | Protein Coding | 48 | GC05M010971 | 0.85 |
| ARF3       | Protein Coding | 46 | GC12M048931 | 0.85 |
| PARVB      | Protein Coding | 45 | GC22P043999 | 0.85 |
| NAP1L1     | Protein Coding | 44 | GC12M076036 | 0.85 |
| MPPED2     | Protein Coding | 43 | GC11M030406 | 0.85 |
| MAML2      | Protein Coding | 43 | GC11M095976 | 0.85 |
| CBFA2T2    | Protein Coding | 43 | GC20P033490 | 0.85 |
| EGFL7      | Protein Coding | 43 | GC09P136658 | 0.85 |
| BCO2       | Protein Coding | 43 | GC11P112175 | 0.85 |
| FBLIM1     | Protein Coding | 43 | GC01P015756 | 0.85 |
| NCR2       | Protein Coding | 42 | GC06P043253 | 0.85 |
| SCARA3     | Protein Coding | 41 | GC08P027633 | 0.85 |
| INTS10     | Protein Coding | 39 | GC08P019721 | 0.85 |
| GPR65      | Protein Coding | 45 | GC14P088005 | 0.85 |
| YWHAB      | Protein Coding | 55 | GC20P044885 | 0.85 |
| DEFB4A     | Protein Coding | 42 | GC08P007895 | 0.85 |
| XPO5       | Protein Coding | 46 | GC06M043490 | 0.85 |
| UPK1B      | Protein Coding | 42 | GC03P119173 | 0.85 |
| GPSM2      | Protein Coding | 47 | GC01P108875 | 0.84 |
| MAX        | Protein Coding | 54 | GC14M065009 | 0.83 |
| COL13A1    | Protein Coding | 47 | GC10P069801 | 0.83 |
| SALL1      | Protein Coding | 50 | GC16M051217 | 0.83 |
| SLC12A2    | Protein Coding | 52 | GC05P128083 | 0.83 |





|           |                |    |             |      |
|-----------|----------------|----|-------------|------|
| BHLHE40   | Protein Coding | 47 | GC03P004997 | 0.63 |
| JPH4      | Protein Coding | 39 | GC14M023568 | 0.63 |
| MTNR1B    | Protein Coding | 50 | GC11P092969 | 0.63 |
| AKAP6     | Protein Coding | 45 | GC14P032329 | 0.63 |
| ARHGEF10L | Protein Coding | 42 | GC01P017520 | 0.63 |
| NFYA      | Protein Coding | 46 | GC06P043252 | 0.63 |
| FBN3      | Protein Coding | 42 | GC19M008065 | 0.63 |
| CHRFAM7A  | Protein Coding | 39 | GC15M030360 | 0.62 |
| POLQ      | Protein Coding | 45 | GC03M121431 | 0.62 |
| CHRNA1    | Protein Coding | 51 | GC17P007823 | 0.62 |
| CASP14    | Protein Coding | 51 | GC19P015049 | 0.62 |
| SKP1      | Protein Coding | 48 | GC05M134148 | 0.61 |
| HLA-F     | Protein Coding | 46 | GC06P032409 | 0.61 |
| ZNRD1     | Protein Coding | 43 | GC06P032435 | 0.61 |
| ITGA8     | Protein Coding | 50 | GC10M015555 | 0.61 |
| KCNMB2    | Protein Coding | 41 | GC03P178272 | 0.61 |
| SPRR1A    | Protein Coding | 41 | GC01P152984 | 0.61 |
| ARF6      | Protein Coding | 51 | GC14P049895 | 0.61 |
| MAPKAPK5  | Protein Coding | 49 | GC12P111842 | 0.6  |
| BRAP      | Protein Coding | 46 | GC12M111642 | 0.6  |
| MTX1      | Protein Coding | 44 | GC01P155208 | 0.6  |
| CDK11A    | Protein Coding | 44 | GC01M001702 | 0.6  |
| SCAMP3    | Protein Coding | 44 | GC01M155255 | 0.6  |
| ASIP      | Protein Coding | 43 | GC20P034194 | 0.6  |
| NOC2L     | Protein Coding | 43 | GC01M000945 | 0.6  |
| RALY      | Protein Coding | 42 | GC20P033993 | 0.6  |
| LILRB1    | Protein Coding | 47 | GC19P054617 | 0.6  |
| GNAI3     | Protein Coding | 53 | GC01P109548 | 0.59 |
| RBFOX2    | Protein Coding | 45 | GC22M035738 | 0.59 |
| ASIC1     | Protein Coding | 49 | GC12P050057 | 0.59 |
| APOF      | Protein Coding | 44 | GC12M056361 | 0.59 |
| KCNMB4    | Protein Coding | 46 | GC12P070369 | 0.59 |
| TFAP2B    | Protein Coding | 52 | GC06P050894 | 0.59 |
| FAM111A   | Protein Coding | 43 | GC11P059142 | 0.59 |
| BIK       | Protein Coding | 46 | GC22P043110 | 0.59 |
| KNL1      | Protein Coding | 35 | GC15P040595 | 0.59 |
| CA4       | Protein Coding | 53 | GC17P060149 | 0.58 |
| MIR7977   | RNA Gene       | 10 | GC03P176515 | 0.58 |
| MGAT5     | Protein Coding | 45 | GC02P134119 | 0.57 |
| PPP1CA    | Protein Coding | 53 | GC11M067415 | 0.57 |
| TTC27     | Protein Coding | 38 | GC02P032628 | 0.57 |
| B4GALT1   | Protein Coding | 51 | GC09M033100 | 0.56 |
| DLG1      | Protein Coding | 49 | GC03M197118 | 0.56 |
| AIM2      | Protein Coding | 48 | GC01M159062 | 0.56 |
| MAK       | Protein Coding | 48 | GC06M010820 | 0.56 |
| UQCRC1    | Protein Coding | 47 | GC03M048598 | 0.55 |
| SLC9A3R2  | Protein Coding | 45 | GC16P002320 | 0.55 |
| SFPQ      | Protein Coding | 50 | GC01M035176 | 0.55 |
| EIF4A2    | Protein Coding | 51 | GC03P186783 | 0.54 |
| MAST4     | Protein Coding | 44 | GC05P066596 | 0.54 |
| KRIT1     | Protein Coding | 48 | GC07M092198 | 0.54 |
| RFC4      | Protein Coding | 46 | GC03M186789 | 0.54 |
| THADA     | Protein Coding | 43 | GC02M043193 | 0.53 |
| PDIA2     | Protein Coding | 45 | GC16P000607 | 0.53 |
| GPLD1     | Protein Coding | 47 | GC06M024425 | 0.53 |
| MADD      | Protein Coding | 46 | GC11P047290 | 0.53 |
| YWHAE     | Protein Coding | 56 | GC17M001346 | 0.53 |
| RPL10A    | Protein Coding | 46 | GC06P043126 | 0.52 |
| LOXL4     | Protein Coding | 48 | GC10M098247 | 0.52 |
| IDH3B     | Protein Coding | 51 | GC20M002658 | 0.52 |
| PRPF3     | Protein Coding | 49 | GC01P150321 | 0.52 |
| DACT1     | Protein Coding | 45 | GC14P058633 | 0.51 |
| MLEC      | Protein Coding | 42 | GC12P120687 | 0.51 |
| RPLP2     | Protein Coding | 46 | GC11P000858 | 0.51 |
| RUVBL2    | Protein Coding | 50 | GC19P048993 | 0.5  |
| INTS4     | Protein Coding | 40 | GC11M077878 | 0.5  |
| PRMT7     | Protein Coding | 50 | GC16P068344 | 0.5  |
| LPO       | Protein Coding | 45 | GC17P058218 | 0.5  |
| C12orf43  | Protein Coding | 37 | GC12M121000 | 0.49 |
| ORC2      | Protein Coding | 43 | GC02M200908 | 0.49 |
| MIR367    | RNA Gene       | 19 | GC04M112647 | 0.49 |
| MIR519D   | RNA Gene       | 19 | GC19P053713 | 0.49 |
| SMOC2     | Protein Coding | 48 | GC06P168441 | 0.49 |
| SPANXC    | Protein Coding | 35 | GC0XM141241 | 0.49 |
| PCYT1B    | Protein Coding | 47 | GC0XM024576 | 0.49 |
| NUP93     | Protein Coding | 47 | GC16P056764 | 0.48 |
| EPB41L2   | Protein Coding | 44 | GC06M130820 | 0.48 |
| NEDD4     | Protein Coding | 52 | GC15M055826 | 0.48 |
| DLK1      | Protein Coding | 50 | GC14P103771 | 0.48 |
| IMPDH2    | Protein Coding | 53 | GC03M049151 | 0.48 |
| RPA2      | Protein Coding | 51 | GC01M027902 | 0.48 |
| PPP1R3A   | Protein Coding | 48 | GC07M113876 | 0.48 |
| RBBP7     | Protein Coding | 46 | GC0XM016772 | 0.48 |
| RBM5      | Protein Coding | 45 | GC03P050101 | 0.48 |
| UQCRH     | Protein Coding | 45 | GC01P046303 | 0.48 |
| MARCKSL1  | Protein Coding | 43 | GC01M032334 | 0.48 |
| PPP1R13B  | Protein Coding | 43 | GC14M103733 | 0.48 |
| CHRNA5    | Protein Coding | 51 | GC15P078565 | 0.48 |
| CA14      | Protein Coding | 50 | GC01P150258 | 0.48 |
| ABCC5     | Protein Coding | 49 | GC03M183919 | 0.48 |
| TAGLN     | Protein Coding | 48 | GC11P117199 | 0.47 |
| DOK5      | Protein Coding | 43 | GC20P054476 | 0.47 |
| TM7SF3    | Protein Coding | 39 | GC12M026971 | 0.47 |
| INTS13    | Protein Coding | 31 | GC12M026906 | 0.47 |
| M6PR      | Protein Coding | 50 | GC12M008984 | 0.47 |
| UCK2      | Protein Coding | 48 | GC01P165796 | 0.47 |
| AANAT     | Protein Coding | 44 | GC17P076453 | 0.47 |
| RCC2      | Protein Coding | 43 | GC01M017406 | 0.47 |
| INTS3     | Protein Coding | 42 | GC01P153728 | 0.47 |
| SIGLEC9   | Protein Coding | 42 | GC19P051124 | 0.47 |









# Supplementary Table S4: Compound-target network

| MOLID     | MOLname          | Target | MOLID     | MOLname                | Target |
|-----------|------------------|--------|-----------|------------------------|--------|
| MOL012254 | campesterol      | PGR    | MOL000006 | luteolin               | EGFR   |
| MOL000519 | coniferin        | CHRM3  | MOL000006 | luteolin               | AKT1   |
| MOL000359 | beta-sitosterol  | PGR    | MOL000006 | luteolin               | VEGFA  |
| MOL000622 | Magnograndiolide | GABRA2 | MOL000006 | luteolin               | CCND1  |
| MOL000622 | Magnograndiolide | GABRA1 | MOL000006 | luteolin               | BCL2L1 |
| MOL000622 | Magnograndiolide | GRIA2  | MOL000006 | luteolin               | CDKN1A |
| MOL000622 | Magnograndiolide | GABRA6 | MOL000006 | luteolin               | CASP9  |
| MOL000785 | palmatine        | NOS2   | MOL000006 | luteolin               | MMP9   |
| MOL000785 | palmatine        | PTGS1  | MOL000006 | luteolin               | MAPK1  |
| MOL000785 | palmatine        | KCNH2  | MOL000006 | luteolin               | IL10   |
| MOL000785 | palmatine        | ESR1   | MOL000006 | luteolin               | CDK4   |
| MOL000785 | palmatine        | AR     | MOL000006 | luteolin               | TNF    |
| MOL000785 | palmatine        | SCN5A  | MOL000006 | luteolin               | JUN    |
| MOL000785 | palmatine        | PTGS2  | MOL000006 | luteolin               | IL6    |
| MOL000785 | palmatine        | NOS3   | MOL000006 | luteolin               | CASP3  |
| MOL000785 | palmatine        | ADRB2  | MOL000006 | luteolin               | TP53   |
| MOL000785 | palmatine        | ESR2   | MOL000006 | luteolin               | NFKBIA |
| MOL000785 | palmatine        | F7     | MOL000006 | luteolin               | TOP1   |
| MOL000098 | quercetin        | PTGS1  | MOL000006 | luteolin               | MDM2   |
| MOL000098 | quercetin        | AR     | MOL000006 | luteolin               | APP    |
| MOL000098 | quercetin        | PPARG  | MOL000006 | luteolin               | MMP1   |
| MOL000098 | quercetin        | PTGS2  | MOL000006 | luteolin               | PCNA   |
| MOL000098 | quercetin        | DPP4   | MOL000006 | luteolin               | ERBB2  |
| MOL000098 | quercetin        | AKR1B1 | MOL000006 | luteolin               | PPARG  |
| MOL000098 | quercetin        | KCNH2  | MOL000006 | luteolin               | HMOX1  |
| MOL000098 | quercetin        | SCN5A  | MOL000006 | luteolin               | ICAM1  |
| MOL000098 | quercetin        | ADRB2  | MOL000006 | luteolin               | MCL1   |
| MOL000098 | quercetin        | MMP3   | MOL000006 | luteolin               | IL2    |
| MOL000098 | quercetin        | F7     | MOL000006 | luteolin               | TYR    |
| MOL000098 | quercetin        | NOS3   | MOL000006 | luteolin               | IFNG   |
| MOL000098 | quercetin        | ACHE   | MOL000006 | luteolin               | IL4    |
| MOL000098 | quercetin        | GABRA1 | MOL000006 | luteolin               | GSTP1  |
| MOL000098 | quercetin        | MAOB   | MOL000006 | luteolin               | XIAP   |
| MOL000098 | quercetin        | EGFR   | MOL000006 | luteolin               | SLC2A4 |
| MOL000098 | quercetin        | AKT1   | MOL000006 | luteolin               | INSR   |
| MOL000098 | quercetin        | VEGFA  | MOL000006 | luteolin               | CD40LG |
| MOL000098 | quercetin        | CCND1  | MOL000006 | luteolin               | ADCY2  |
| MOL000098 | quercetin        | BCL2   | MOL000006 | luteolin               | MET    |
| MOL000098 | quercetin        | BCL2L1 | MOL001454 | berberine              | NOS2   |
| MOL000098 | quercetin        | FOS    | MOL001454 | berberine              | PTGS1  |
| MOL000098 | quercetin        | CDKN1A | MOL001454 | berberine              | KCNH2  |
| MOL000098 | quercetin        | BAX    | MOL001454 | berberine              | ESR1   |
| MOL000098 | quercetin        | CASP9  | MOL001454 | berberine              | AR     |
| MOL000098 | quercetin        | PLAU   | MOL001454 | berberine              | SCN5A  |
| MOL000098 | quercetin        | MMP9   | MOL001454 | berberine              | PTGS2  |
| MOL000098 | quercetin        | MAPK1  | MOL001454 | berberine              | NOS3   |
| MOL000098 | quercetin        | IL10   | MOL001454 | berberine              | ADRB2  |
| MOL000098 | quercetin        | EGF    | MOL001454 | berberine              | PDE10A |
| MOL000098 | quercetin        | TNF    | MOL002641 | Phellavin_qt           | PTGS2  |
| MOL000098 | quercetin        | JUN    | MOL002641 | Phellavin_qt           | F7     |
| MOL000098 | quercetin        | IL6    | MOL002643 | delta 7-stigmastenol   | PGR    |
| MOL000098 | quercetin        | CASP3  | MOL002644 | Phellopterin           | CHRM1  |
| MOL000098 | quercetin        | TP53   | MOL002644 | Phellopterin           | SCN5A  |
| MOL000098 | quercetin        | NFKBIA | MOL002644 | Phellopterin           | PTGS2  |
| MOL000098 | quercetin        | ODC1   | MOL002644 | Phellopterin           | ADRA1B |
| MOL000098 | quercetin        | CASP8  | MOL002644 | Phellopterin           | ADRB2  |
| MOL000098 | quercetin        | TOP1   | MOL002644 | Phellopterin           | GABRA1 |
| MOL000098 | quercetin        | RAF1   | MOL002644 | Phellopterin           | DPP4   |
| MOL000098 | quercetin        | SOD1   | MOL002651 | Dehydrotanshinone II A | DRD1   |
| MOL000098 | quercetin        | PRKCA  | MOL002651 | Dehydrotanshinone II A | CHRM3  |
| MOL000098 | quercetin        | MMP1   | MOL002651 | Dehydrotanshinone II A | CHRM1  |
| MOL000098 | quercetin        | HIF1A  | MOL002651 | Dehydrotanshinone II A | ESR1   |
| MOL000098 | quercetin        | STAT1  | MOL002651 | Dehydrotanshinone II A | AR     |
| MOL000098 | quercetin        | HSPA5  | MOL002651 | Dehydrotanshinone II A | SCN5A  |
| MOL000098 | quercetin        | ERBB2  | MOL002651 | Dehydrotanshinone II A | PPARG  |
| MOL000098 | quercetin        | HMOX1  | MOL002651 | Dehydrotanshinone II A | CHRM5  |

|           |                  |          |           |                        |        |
|-----------|------------------|----------|-----------|------------------------|--------|
| MOL000098 | quercetin        | CYP3A4   | MOL002651 | Dehydrotanshinone II A | PTGS2  |
| MOL000098 | quercetin        | CYP1A2   | MOL002651 | Dehydrotanshinone II A | OPRD1  |
| MOL000098 | quercetin        | MYC      | MOL002651 | Dehydrotanshinone II A | ACHE   |
| MOL000098 | quercetin        | F3       | MOL002651 | Dehydrotanshinone II A | ADRA1A |
| MOL000098 | quercetin        | CYP1A1   | MOL002651 | Dehydrotanshinone II A | ADRB2  |
| MOL000098 | quercetin        | ICAM1    | MOL002651 | Dehydrotanshinone II A | OPRM1  |
| MOL000098 | quercetin        | IL1B     | MOL002651 | Dehydrotanshinone II A | GABRA1 |
| MOL000098 | quercetin        | CCL2     | MOL002651 | Dehydrotanshinone II A | DPP4   |
| MOL000098 | quercetin        | SELE     | MOL002662 | rutaecarpine           | PTGS1  |
| MOL000098 | quercetin        | VCAM1    | MOL002662 | rutaecarpine           | AR     |
| MOL000098 | quercetin        | CXCL8    | MOL002662 | rutaecarpine           | SCN5A  |
| MOL000098 | quercetin        | PRKCB    | MOL002662 | rutaecarpine           | PTGS2  |
| MOL000098 | quercetin        | TGFB1    | MOL002662 | rutaecarpine           | NOS3   |
| MOL000098 | quercetin        | MGAM     | MOL002662 | rutaecarpine           | HTR3A  |
| MOL000098 | quercetin        | IL2      | MOL002662 | rutaecarpine           | MMP9   |
| MOL000098 | quercetin        | NR1I2    | MOL002662 | rutaecarpine           | TNF    |
| MOL000098 | quercetin        | CYP1B1   | MOL002662 | rutaecarpine           | CYP3A4 |
| MOL000098 | quercetin        | PLAT     | MOL002662 | rutaecarpine           | CYP1A2 |
| MOL000098 | quercetin        | THBD     | MOL002662 | rutaecarpine           | IL4    |
| MOL000098 | quercetin        | SERPINE1 | MOL002662 | rutaecarpine           | CYP2B6 |
| MOL000098 | quercetin        | COL1A1   | MOL002663 | Skimmianin             | GABRA1 |
| MOL000098 | quercetin        | IFNG     | MOL002666 | Chelerythrine          | PTGS1  |
| MOL000098 | quercetin        | PTEN     | MOL002666 | Chelerythrine          | KCNH2  |
| MOL000098 | quercetin        | IL1A     | MOL002666 | Chelerythrine          | PTGS2  |
| MOL000098 | quercetin        | MPO      | MOL002670 | Cavidine               | PTGS1  |
| MOL000098 | quercetin        | NCF1     | MOL002670 | Cavidine               | CHRM3  |
| MOL000098 | quercetin        | GSTP1    | MOL002670 | Cavidine               | KCNH2  |
| MOL000098 | quercetin        | NFE2L2   | MOL002670 | Cavidine               | CHRM1  |
| MOL000098 | quercetin        | PARP1    | MOL002670 | Cavidine               | ADRB1  |
| MOL000098 | quercetin        | AHR      | MOL002670 | Cavidine               | SCN5A  |
| MOL000098 | quercetin        | PSMD3    | MOL002670 | Cavidine               | CHRM5  |
| MOL000098 | quercetin        | SLC2A4   | MOL002670 | Cavidine               | PTGS2  |
| MOL000098 | quercetin        | CXCL2    | MOL002670 | Cavidine               | HTR3A  |
| MOL000098 | quercetin        | NR1I3    | MOL002670 | Cavidine               | ADRA2C |
| MOL000098 | quercetin        | CHEK2    | MOL002670 | Cavidine               | OPRD1  |
| MOL000098 | quercetin        | INSR     | MOL002670 | Cavidine               | ADRA1B |
| MOL000098 | quercetin        | PPARA    | MOL002670 | Cavidine               | ADRB2  |
| MOL000098 | quercetin        | PPARD    | MOL002670 | Cavidine               | ADRA1D |
| MOL000098 | quercetin        | HSF1     | MOL002670 | Cavidine               | OPRM1  |
| MOL000098 | quercetin        | CRP      | MOL002670 | Cavidine               | DRD1   |
| MOL000098 | quercetin        | CXCL10   | MOL002670 | Cavidine               | SLC6A4 |
| MOL000098 | quercetin        | CHUK     | MOL002670 | Cavidine               | F7     |
| MOL000098 | quercetin        | SPP1     | MOL002670 | Cavidine               | PDE10A |
| MOL000098 | quercetin        | RUNX2    | MOL000787 | Fumarine               | PTGS1  |
| MOL000098 | quercetin        | E2F1     | MOL000787 | Fumarine               | CHRM3  |
| MOL000098 | quercetin        | ACPP     | MOL000787 | Fumarine               | KCNH2  |
| MOL000098 | quercetin        | CTSD     | MOL000787 | Fumarine               | CHRM1  |
| MOL000098 | quercetin        | IGFBP3   | MOL000787 | Fumarine               | SCN5A  |
| MOL000098 | quercetin        | IGF2     | MOL000787 | Fumarine               | CHRM5  |
| MOL000098 | quercetin        | CD40LG   | MOL000787 | Fumarine               | PTGS2  |
| MOL000098 | quercetin        | IRF1     | MOL000787 | Fumarine               | HTR3A  |
| MOL000098 | quercetin        | ERBB3    | MOL000787 | Fumarine               | F7     |
| MOL000098 | quercetin        | PON1     | MOL000787 | Fumarine               | OPRD1  |
| MOL000098 | quercetin        | DIO1     | MOL000787 | Fumarine               | ADRA1B |
| MOL000098 | quercetin        | RASA1    | MOL000787 | Fumarine               | ADRB2  |
| MOL000098 | quercetin        | GSTM1    | MOL000787 | Fumarine               | ADRA1D |
| MOL001458 | coptisine        | NOS2     | MOL000787 | Fumarine               | OPRM1  |
| MOL001458 | coptisine        | PTGS1    | MOL000787 | Fumarine               | SLC6A4 |
| MOL001458 | coptisine        | KCNH2    | MOL000787 | Fumarine               | PDE3A  |
| MOL001458 | coptisine        | ESR1     | MOL000787 | Fumarine               | SLC6A3 |
| MOL001458 | coptisine        | AR       | MOL000787 | Fumarine               | DRD1   |
| MOL001458 | coptisine        | SCN5A    | MOL000790 | Isocorypalmine         | PTGS1  |
| MOL001458 | coptisine        | PTGS2    | MOL000790 | Isocorypalmine         | DRD1   |
| MOL001458 | coptisine        | NOS3     | MOL000790 | Isocorypalmine         | CHRM3  |
| MOL002668 | Worenine         | NOS2     | MOL000790 | Isocorypalmine         | KCNH2  |
| MOL002668 | Worenine         | PTGS1    | MOL000790 | Isocorypalmine         | CHRM1  |
| MOL002668 | Worenine         | ESR1     | MOL000790 | Isocorypalmine         | DRD5   |
| MOL002668 | Worenine         | AR       | MOL000790 | Isocorypalmine         | SCN5A  |
| MOL002668 | Worenine         | PTGS2    | MOL000790 | Isocorypalmine         | CHRM5  |
| MOL001918 | paeoniflorgenone | GABRA1   | MOL000790 | Isocorypalmine         | PTGS2  |

|           |                                                                                                                             |        |           |                     |        |
|-----------|-----------------------------------------------------------------------------------------------------------------------------|--------|-----------|---------------------|--------|
| MOL001919 | (3S,5R,8R,9R,10S,14S)-3,17-dihydroxy-4,4,8,10,14-pentamethyl-2,3,5,6,7,9-hexahydro-1H-cyclopenta[a]phenanthrene-15,16-dione | PGR    | MOL000790 | Isocorypalmine      | HTR3A  |
| MOL001919 | (3S,5R,8R,9R,10S,14S)-3,17-dihydroxy-4,4,8,10,14-pentamethyl-2,3,5,6,7,9-hexahydro-1H-cyclopenta[a]phenanthrene-15,16-dione | NR3C2  | MOL000790 | Isocorypalmine      | CA2    |
| MOL001924 | paeoniflorin                                                                                                                | TNF    | MOL000790 | Isocorypalmine      | ADRA2C |
| MOL001924 | paeoniflorin                                                                                                                | IL6    | MOL000790 | Isocorypalmine      | OPRD1  |
| MOL001924 | paeoniflorin                                                                                                                | CD14   | MOL000790 | Isocorypalmine      | SLC6A2 |
| MOL000211 | Mairin                                                                                                                      | PGR    | MOL000790 | Isocorypalmine      | ADRA1A |
| MOL000358 | beta-sitosterol                                                                                                             | PGR    | MOL000790 | Isocorypalmine      | CHRM2  |
| MOL000358 | beta-sitosterol                                                                                                             | PTGS1  | MOL000790 | Isocorypalmine      | ADRA2B |
| MOL000358 | beta-sitosterol                                                                                                             | PTGS2  | MOL000790 | Isocorypalmine      | ADRA1B |
| MOL000358 | beta-sitosterol                                                                                                             | KCNH2  | MOL000790 | Isocorypalmine      | DRD3   |
| MOL000358 | beta-sitosterol                                                                                                             | DRD1   | MOL000790 | Isocorypalmine      | SLC6A3 |
| MOL000358 | beta-sitosterol                                                                                                             | CHRM3  | MOL000790 | Isocorypalmine      | ADRB2  |
| MOL000358 | beta-sitosterol                                                                                                             | CHRM1  | MOL000790 | Isocorypalmine      | ADRA1D |
| MOL000358 | beta-sitosterol                                                                                                             | SCN5A  | MOL000790 | Isocorypalmine      | SLC6A4 |
| MOL000358 | beta-sitosterol                                                                                                             | GABRA2 | MOL000790 | Isocorypalmine      | OPRM1  |
| MOL000358 | beta-sitosterol                                                                                                             | PDE3A  | MOL000790 | Isocorypalmine      | KCNMA1 |
| MOL000358 | beta-sitosterol                                                                                                             | GABRA5 | MOL001131 | phellamurin_qt      | ESR1   |
| MOL000358 | beta-sitosterol                                                                                                             | ADRA1A | MOL001131 | phellamurin_qt      | PTGS2  |
| MOL000358 | beta-sitosterol                                                                                                             | GABRA3 | MOL001131 | phellamurin_qt      | F7     |
| MOL000358 | beta-sitosterol                                                                                                             | CHRM2  | MOL001131 | phellamurin_qt      | PDE3A  |
| MOL000358 | beta-sitosterol                                                                                                             | ADRA1B | MOL001131 | phellamurin_qt      | NR3C1  |
| MOL000358 | beta-sitosterol                                                                                                             | ADRB2  | MOL001455 | (S)-Canadine        | PTGS1  |
| MOL000358 | beta-sitosterol                                                                                                             | CHRNA2 | MOL001455 | (S)-Canadine        | DRD1   |
| MOL000358 | beta-sitosterol                                                                                                             | SLC6A4 | MOL001455 | (S)-Canadine        | CHRM3  |
| MOL000358 | beta-sitosterol                                                                                                             | OPRM1  | MOL001455 | (S)-Canadine        | KCNH2  |
| MOL000358 | beta-sitosterol                                                                                                             | GABRA1 | MOL001455 | (S)-Canadine        | CHRM1  |
| MOL000358 | beta-sitosterol                                                                                                             | BCL2   | MOL001455 | (S)-Canadine        | SCN5A  |
| MOL000358 | beta-sitosterol                                                                                                             | BAX    | MOL001455 | (S)-Canadine        | CHRM5  |
| MOL000358 | beta-sitosterol                                                                                                             | CASP9  | MOL001455 | (S)-Canadine        | PTGS2  |
| MOL000358 | beta-sitosterol                                                                                                             | JUN    | MOL001455 | (S)-Canadine        | HTR3A  |
| MOL000358 | beta-sitosterol                                                                                                             | CASP3  | MOL001455 | (S)-Canadine        | F7     |
| MOL000358 | beta-sitosterol                                                                                                             | CASP8  | MOL001455 | (S)-Canadine        | ADRA2C |
| MOL000358 | beta-sitosterol                                                                                                             | PRKCA  | MOL001455 | (S)-Canadine        | OPRD1  |
| MOL000358 | beta-sitosterol                                                                                                             | TGFB1  | MOL001455 | (S)-Canadine        | ADRA1A |
| MOL000358 | beta-sitosterol                                                                                                             | PON1   | MOL001455 | (S)-Canadine        | CHRM2  |
| MOL000358 | beta-sitosterol                                                                                                             | MAP2   | MOL001455 | (S)-Canadine        | ADRA2B |
| MOL000359 | sitosterol                                                                                                                  | NR3C2  | MOL001455 | (S)-Canadine        | ADRA1B |
| MOL000422 | kaempferol                                                                                                                  | NOS2   | MOL001455 | (S)-Canadine        | DRD3   |
| MOL000422 | kaempferol                                                                                                                  | PTGS1  | MOL001455 | (S)-Canadine        | SLC6A3 |
| MOL000422 | kaempferol                                                                                                                  | AR     | MOL001455 | (S)-Canadine        | ADRB2  |
| MOL000422 | kaempferol                                                                                                                  | PPARG  | MOL001455 | (S)-Canadine        | ADRA1D |
| MOL000422 | kaempferol                                                                                                                  | PTGS2  | MOL001455 | (S)-Canadine        | SLC6A4 |
| MOL000422 | kaempferol                                                                                                                  | DPP4   | MOL001455 | (S)-Canadine        | OPRM1  |
| MOL000422 | kaempferol                                                                                                                  | PGR    | MOL001455 | (S)-Canadine        | DRD5   |
| MOL000422 | kaempferol                                                                                                                  | CHRM1  | MOL002331 | N-Methylflindersine | NOS2   |
| MOL000422 | kaempferol                                                                                                                  | NOS3   | MOL002331 | N-Methylflindersine | PTGS1  |
| MOL000422 | kaempferol                                                                                                                  | GABRA2 | MOL002331 | N-Methylflindersine | DRD1   |
| MOL000422 | kaempferol                                                                                                                  | ACHE   | MOL002331 | N-Methylflindersine | CHRM3  |
| MOL000422 | kaempferol                                                                                                                  | SLC6A2 | MOL002331 | N-Methylflindersine | CHRM1  |
| MOL000422 | kaempferol                                                                                                                  | CHRM2  | MOL002331 | N-Methylflindersine | SCN5A  |
| MOL000422 | kaempferol                                                                                                                  | ADRA1B | MOL002331 | N-Methylflindersine | CHRM5  |
| MOL000422 | kaempferol                                                                                                                  | GABRA1 | MOL002331 | N-Methylflindersine | PTGS2  |
| MOL000422 | kaempferol                                                                                                                  | F7     | MOL002331 | N-Methylflindersine | NOS3   |
| MOL000422 | kaempferol                                                                                                                  | IKKBK  | MOL002331 | N-Methylflindersine | PDE3A  |
| MOL000422 | kaempferol                                                                                                                  | AKT1   | MOL002331 | N-Methylflindersine | SLC6A2 |
| MOL000422 | kaempferol                                                                                                                  | BCL2   | MOL002331 | N-Methylflindersine | CHRM2  |
| MOL000422 | kaempferol                                                                                                                  | BAX    | MOL002331 | N-Methylflindersine | ADRA1B |
| MOL000422 | kaempferol                                                                                                                  | TNF    | MOL002331 | N-Methylflindersine | SLC6A3 |
| MOL000422 | kaempferol                                                                                                                  | JUN    | MOL002331 | N-Methylflindersine | ADRB2  |
| MOL000422 | kaempferol                                                                                                                  | CASP3  | MOL002331 | N-Methylflindersine | SLC6A4 |
| MOL000422 | kaempferol                                                                                                                  | MAPK8  | MOL002331 | N-Methylflindersine | GABRA1 |
| MOL000422 | kaempferol                                                                                                                  | MMP1   | MOL002331 | N-Methylflindersine | ADRA1A |
| MOL000422 | kaempferol                                                                                                                  | STAT1  | MOL002894 | berberrubine        | NOS2   |
| MOL000422 | kaempferol                                                                                                                  | HMOX1  | MOL002894 | berberrubine        | PTGS1  |

|           |                      |        |           |                              |        |
|-----------|----------------------|--------|-----------|------------------------------|--------|
| MOL000422 | kaempferol           | CYP3A4 | MOL002894 | berberrubine                 | KCNH2  |
| MOL000422 | kaempferol           | CYP1A2 | MOL002894 | berberrubine                 | ESR1   |
| MOL000422 | kaempferol           | CYP1A1 | MOL002894 | berberrubine                 | AR     |
| MOL000422 | kaempferol           | ICAM1  | MOL002894 | berberrubine                 | SCN5A  |
| MOL000422 | kaempferol           | SELE   | MOL002894 | berberrubine                 | PTGS2  |
| MOL000422 | kaempferol           | VCAM1  | MOL002894 | berberrubine                 | NOS3   |
| MOL000422 | kaempferol           | NR1I2  | MOL005438 | campesterol                  | PGR    |
| MOL000422 | kaempferol           | CYP1B1 | MOL006422 | thalifendine                 | NOS2   |
| MOL000422 | kaempferol           | GSTP1  | MOL006422 | thalifendine                 | PTGS1  |
| MOL000422 | kaempferol           | AHR    | MOL006422 | thalifendine                 | KCNH2  |
| MOL000422 | kaempferol           | PSMD3  | MOL006422 | thalifendine                 | ESR1   |
| MOL000422 | kaempferol           | SLC2A4 | MOL006422 | thalifendine                 | AR     |
| MOL000422 | kaempferol           | NR1I3  | MOL006422 | thalifendine                 | SCN5A  |
| MOL000422 | kaempferol           | INSR   | MOL006422 | thalifendine                 | PTGS2  |
| MOL000422 | kaempferol           | DIO1   | MOL006422 | thalifendine                 | NOS3   |
| MOL000422 | kaempferol           | GSTM1  | MOL001323 | Sitosterol alpha1            | PGR    |
| MOL000422 | kaempferol           | SLPI   | MOL001323 | Sitosterol alpha1            | PTGS2  |
| MOL000492 | (+)-catechin         | PTGS1  | MOL001323 | Sitosterol alpha1            | GABRA1 |
| MOL000492 | (+)-catechin         | ESR1   | MOL001323 | Sitosterol alpha1            | ADH1C  |
| MOL000492 | (+)-catechin         | PTGS2  | MOL001323 | Sitosterol alpha1            | NR3C2  |
| MOL000492 | (+)-catechin         | CAT    | MOL003578 | Cycloartenol                 | NR3C2  |
| MOL001677 | asperglaucide        | KCNH2  | MOL001494 | Mandenol                     | PTGS1  |
| MOL001677 | asperglaucide        | PTGS2  | MOL001494 | Mandenol                     | PTGS2  |
| MOL001944 | Marmesin             | PTGS1  | MOL001495 | Ethyl linolenate             | PTGS1  |
| MOL001944 | Marmesin             | ESR1   | MOL001979 | LAN                          | PGR    |
| MOL001944 | Marmesin             | AR     | MOL001979 | LAN                          | NR3C2  |
| MOL001944 | Marmesin             | PTGS2  | MOL005406 | atropine                     | DRD1   |
| MOL001944 | Marmesin             | ADRB2  | MOL005406 | atropine                     | CHRM3  |
| MOL001944 | Marmesin             | SLC6A4 | MOL005406 | atropine                     | CHRM1  |
| MOL001944 | Marmesin             | DPP4   | MOL005406 | atropine                     | ADRB1  |
| MOL001944 | Marmesin             | CHRM1  | MOL005406 | atropine                     | CHRM5  |
| MOL001944 | Marmesin             | CHRM2  | MOL005406 | atropine                     | ADRA2A |
| MOL004373 | Anhydroicaritin      | NOS2   | MOL005406 | atropine                     | ADRA2C |
| MOL004373 | Anhydroicaritin      | PTGS1  | MOL005406 | atropine                     | OPRD1  |
| MOL004373 | Anhydroicaritin      | CHRM3  | MOL005406 | atropine                     | SLC6A2 |
| MOL004373 | Anhydroicaritin      | KCNH2  | MOL005406 | atropine                     | ADRA1A |
| MOL004373 | Anhydroicaritin      | CHRM1  | MOL005406 | atropine                     | CHRM2  |
| MOL004373 | Anhydroicaritin      | ESR1   | MOL005406 | atropine                     | ADRA2B |
| MOL004373 | Anhydroicaritin      | AR     | MOL005406 | atropine                     | ADRA1B |
| MOL004373 | Anhydroicaritin      | SCN5A  | MOL005406 | atropine                     | SLC6A3 |
| MOL004373 | Anhydroicaritin      | PPARG  | MOL005406 | atropine                     | ADRB2  |
| MOL004373 | Anhydroicaritin      | CHRM5  | MOL005406 | atropine                     | SLC6A4 |
| MOL004373 | Anhydroicaritin      | PTGS2  | MOL005406 | atropine                     | DRD2   |
| MOL004373 | Anhydroicaritin      | NOS3   | MOL005406 | atropine                     | OPRM1  |
| MOL004373 | Anhydroicaritin      | ACHE   | MOL005406 | atropine                     | GABRA1 |
| MOL004373 | Anhydroicaritin      | ADRA1B | MOL005406 | atropine                     | HRH1   |
| MOL004373 | Anhydroicaritin      | ADRB2  | MOL006209 | cyanin                       | PTGS2  |
| MOL004373 | Anhydroicaritin      | ESR2   | MOL007449 | 24-methylidenelophenol       | PGR    |
| MOL004373 | Anhydroicaritin      | DPP4   | MOL007449 | 24-methylidenelophenol       | NR3C2  |
| MOL004373 | Anhydroicaritin      | MAPK14 | MOL008173 | daucosterol_qt               | PGR    |
| MOL004373 | Anhydroicaritin      | GSK3B  | MOL008400 | glycitein                    | PTGS1  |
| MOL004373 | Anhydroicaritin      | F7     | MOL008400 | glycitein                    | ESR1   |
| MOL004373 | Anhydroicaritin      | KCNMA1 | MOL008400 | glycitein                    | AR     |
| MOL004489 | Anemarsaponin F_qt   | NR3C1  | MOL008400 | glycitein                    | PPARG  |
| MOL004497 | Hippeastrine         | CHRM3  | MOL008400 | glycitein                    | PTGS2  |
| MOL004497 | Hippeastrine         | CHRM1  | MOL008400 | glycitein                    | PDE3A  |
| MOL004497 | Hippeastrine         | AR     | MOL008400 | glycitein                    | ESR2   |
| MOL004497 | Hippeastrine         | SCN5A  | MOL008400 | glycitein                    | MAPK14 |
| MOL004497 | Hippeastrine         | OPRD1  | MOL008400 | glycitein                    | GSK3B  |
| MOL004497 | Hippeastrine         | ADRA1B | MOL008400 | glycitein                    | NOS2   |
| MOL004497 | Hippeastrine         | OPRM1  | MOL008400 | glycitein                    | APP    |
| MOL004497 | Hippeastrine         | GABRA1 | MOL008400 | glycitein                    | MMP13  |
| MOL004514 | Timosaponin B III_qt | PGR    | MOL008400 | glycitein                    | MMP8   |
| MOL004514 | Timosaponin B III_qt | NR3C1  | MOL000953 | CLR                          | PGR    |
| MOL000449 | Stigmasterol         | PGR    | MOL000953 | CLR                          | NR3C2  |
| MOL000449 | Stigmasterol         | NR3C2  | MOL009604 | 14b-pregnane                 | PTGS2  |
| MOL000449 | Stigmasterol         | ADH1C  | MOL009604 | 14b-pregnane                 | PGR    |
| MOL000449 | Stigmasterol         | PTGS1  | MOL009617 | 24-ethylcholest-22-enol      | PGR    |
| MOL000449 | Stigmasterol         | PTGS2  | MOL009618 | 24-ethylcholesta-5,22-dienol | PGR    |
| MOL000449 | Stigmasterol         | ADRA2A | MOL009618 | 24-ethylcholesta-5,22-dienol | NR3C2  |



|           |                                                                                                                     |        |           |                       |        |
|-----------|---------------------------------------------------------------------------------------------------------------------|--------|-----------|-----------------------|--------|
| MOL008864 | [(7S,8R)-7-hydroxy-5,6,7,8-tetrahydro-3H-pyrrolizin-1-yl]methyl (2R)-2-hydroxy-2-(1-hydroxyethyl)-3-methylbutanoate | PTGS2  | MOL000354 | isorhamnetin          | ESR1   |
| MOL008871 | Marckine                                                                                                            | PTGS2  | MOL000354 | isorhamnetin          | AR     |
| MOL002879 | Diop                                                                                                                | SCN5A  | MOL000354 | isorhamnetin          | PPARG  |
| MOL002879 | Diop                                                                                                                | ADRB2  | MOL000354 | isorhamnetin          | PTGS2  |
| MOL002879 | Diop                                                                                                                | CHRM3  | MOL000354 | isorhamnetin          | ESR2   |
| MOL006147 | Alizarin-2-methylether                                                                                              | PTGS1  | MOL000354 | isorhamnetin          | DPP4   |
| MOL006147 | Alizarin-2-methylether                                                                                              | ESR1   | MOL000354 | isorhamnetin          | MAPK14 |
| MOL006147 | Alizarin-2-methylether                                                                                              | PTGS2  | MOL000354 | isorhamnetin          | GSK3B  |
| MOL006147 | Alizarin-2-methylether                                                                                              | PDE3A  | MOL000354 | isorhamnetin          | PYGM   |
| MOL006147 | Alizarin-2-methylether                                                                                              | SLC6A4 | MOL000354 | isorhamnetin          | PPARD  |
| MOL006147 | Alizarin-2-methylether                                                                                              | GABRA1 | MOL000354 | isorhamnetin          | AKR1B1 |
| MOL009495 | 2-hydroxy-1,5-dimethoxy-6-(methoxymethyl)-9,10-anthraquinone                                                        | PTGS1  | MOL000354 | isorhamnetin          | F7     |
| MOL009495 | 2-hydroxy-1,5-dimethoxy-6-(methoxymethyl)-9,10-anthraquinone                                                        | KCNH2  | MOL000354 | isorhamnetin          | NOS3   |
| MOL009495 | 2-hydroxy-1,5-dimethoxy-6-(methoxymethyl)-9,10-anthraquinone                                                        | SCN5A  | MOL000354 | isorhamnetin          | ACHE   |
| MOL009495 | 2-hydroxy-1,5-dimethoxy-6-(methoxymethyl)-9,10-anthraquinone                                                        | PTGS2  | MOL000354 | isorhamnetin          | GABRA1 |
| MOL009495 | 2-hydroxy-1,5-dimethoxy-6-(methoxymethyl)-9,10-anthraquinone                                                        | F7     | MOL000354 | isorhamnetin          | MAOB   |
| MOL009495 | 2-hydroxy-1,5-dimethoxy-6-(methoxymethyl)-9,10-anthraquinone                                                        | KCNMA1 | MOL000354 | isorhamnetin          | GRIA2  |
| MOL009496 | 1,5,7-trihydroxy-6-methoxy-2-methoxymethylanthracenequinon                                                          | PTGS1  | MOL000354 | isorhamnetin          | NCF1   |
| MOL009496 | 1,5,7-trihydroxy-6-methoxy-2-methoxymethylanthracenequinon                                                          | PTGS2  | MOL000354 | isorhamnetin          | OLR1   |
| MOL009496 | 1,5,7-trihydroxy-6-methoxy-2-methoxymethylanthracenequinon                                                          | F7     | MOL005043 | campest-5-en-3beta-ol | PGR    |
| MOL009500 | 1,6-dihydroxy-5-methoxy-2-(methoxymethyl)-9,10-anthraquinone                                                        | PTGS1  | MOL005440 | Isofucosterol         | PGR    |
| MOL009500 | 1,6-dihydroxy-5-methoxy-2-(methoxymethyl)-9,10-anthraquinone                                                        | SCN5A  | MOL005440 | Isofucosterol         | NR3C2  |
| MOL009500 | 1,6-dihydroxy-5-methoxy-2-(methoxymethyl)-9,10-anthraquinone                                                        | PTGS2  | MOL005440 | Isofucosterol         | ABAT   |
| MOL009500 | 1,6-dihydroxy-5-methoxy-2-(methoxymethyl)-9,10-anthraquinone                                                        | F7     | MOL005440 | Isofucosterol         | GABRA1 |
| MOL009504 | 1-hydroxy-6-hydroxymethylanthracenequinone                                                                          | PTGS1  | MOL005440 | Isofucosterol         | ADH1B  |
| MOL009504 | 1-hydroxy-6-hydroxymethylanthracenequinone                                                                          | PTGS2  | MOL005440 | Isofucosterol         | ADH1C  |
| MOL009504 | 1-hydroxy-6-hydroxymethylanthracenequinone                                                                          | PDE3A  | MOL005440 | Isofucosterol         | ADH1A  |
| MOL009504 | 1-hydroxy-6-hydroxymethylanthracenequinone                                                                          | ADRB2  | MOL005944 | matrine               | TNF    |
| MOL009504 | 1-hydroxy-6-hydroxymethylanthracenequinone                                                                          | GABRA1 | MOL005944 | matrine               | IL6    |
| MOL009513 | 2-hydroxy-1,8-dimethoxy-7-methoxymethylanthracenequinon                                                             | PTGS1  | MOL005944 | matrine               | CASP3  |
| MOL009513 | 2-hydroxy-1,8-dimethoxy-7-methoxymethylanthracenequinon                                                             | SCN5A  | MOL005944 | matrine               | MYC    |
| MOL009513 | 2-hydroxy-1,8-dimethoxy-7-methoxymethylanthracenequinon                                                             | PTGS2  | MOL005944 | matrine               | ICAM1  |
| MOL009513 | 2-hydroxy-1,8-dimethoxy-7-methoxymethylanthracenequinon                                                             | F7     | MOL005944 | matrine               | CD44   |
| MOL009513 | 2-hydroxy-1,8-dimethoxy-7-methoxymethylanthracenequinon                                                             | KCNMA1 | MOL010861 | vitamin d             | PGR    |

|           |                                                                                                                                                                  |        |           |                                                         |        |
|-----------|------------------------------------------------------------------------------------------------------------------------------------------------------------------|--------|-----------|---------------------------------------------------------|--------|
| MOL009519 | (2R,3S)-(+)-3',5-Dihydroxy-4,7-dimethoxydihydroflavonol                                                                                                          | PTGS1  | MOL013112 | (+)-4-cholesten-3-one                                   | PGR    |
| MOL009519 | (2R,3S)-(+)-3',5-Dihydroxy-4,7-dimethoxydihydroflavonol                                                                                                          | SCN5A  | MOL005030 | 11-eicosenoic acid                                      | PTGS1  |
| MOL009519 | (2R,3S)-(+)-3',5-Dihydroxy-4,7-dimethoxydihydroflavonol                                                                                                          | PTGS2  | MOL004598 | 3,5,6,7-tetramethoxy-2-(3,4,5-trimethoxyphenyl)chromone | ESR1   |
| MOL009524 | 3beta,20(R),5-alkenyl-stigmastol                                                                                                                                 | PGR    | MOL004598 | 3,5,6,7-tetramethoxy-2-(3,4,5-trimethoxyphenyl)chromone | AR     |
| MOL009525 | 3beta-24S(R)-butyl-5-alkenyl-cholestol                                                                                                                           | PGR    | MOL004598 | 3,5,6,7-tetramethoxy-2-(3,4,5-trimethoxyphenyl)chromone | PTGS2  |
| MOL009537 | americanin A                                                                                                                                                     | ESR1   | MOL004598 | 3,5,6,7-tetramethoxy-2-(3,4,5-trimethoxyphenyl)chromone | F7     |
| MOL009537 | americanin A                                                                                                                                                     | SCN5A  | MOL004598 | 3,5,6,7-tetramethoxy-2-(3,4,5-trimethoxyphenyl)chromone | ACHE   |
| MOL009537 | americanin A                                                                                                                                                     | PTGS2  | MOL004598 | 3,5,6,7-tetramethoxy-2-(3,4,5-trimethoxyphenyl)chromone | ESR2   |
| MOL009537 | americanin A                                                                                                                                                     | DPP4   | MOL004609 | Areapillin                                              | NOS2   |
| MOL009537 | americanin A                                                                                                                                                     | GSK3B  | MOL004609 | Areapillin                                              | AR     |
| MOL009551 | isoprincepin                                                                                                                                                     | ACHE   | MOL004609 | Areapillin                                              | SCN5A  |
| MOL009562 | Ohioensin-A                                                                                                                                                      | PTGS1  | MOL004609 | Areapillin                                              | PTGS2  |
| MOL009562 | Ohioensin-A                                                                                                                                                      | PTGS2  | MOL004609 | Areapillin                                              | F7     |
|           | (2R)-2-[(3S,5R,10S,13R,14R,16R,17R)-3,16-dihydroxy-4,4,10,13,14-pentamethyl-2,3,5,6,12,15,16,17-octahydro-1H-cyclopenta[a]phenanthren-17-yl]-6-trametenolic acid |        |           |                                                         |        |
| MOL000273 |                                                                                                                                                                  | NR3C2  | MOL004609 | Areapillin                                              | ESR2   |
| MOL000275 |                                                                                                                                                                  | NR3C2  | MOL004609 | Areapillin                                              | DPP4   |
| MOL000279 | Cerevisterol                                                                                                                                                     | NR3C2  | MOL013187 | Cubebin                                                 | PTGS1  |
| MOL000282 | ergosta-7,22E-dien-3beta-ol                                                                                                                                      | PGR    | MOL013187 | Cubebin                                                 | PTGS2  |
| MOL000283 | Ergosterol peroxide                                                                                                                                              | PGR    | MOL013187 | Cubebin                                                 | ADRB2  |
| MOL000296 | hederagenin                                                                                                                                                      | PGR    | MOL004624 | Longikaurin A                                           | CHRM1  |
| MOL000296 | hederagenin                                                                                                                                                      | CHRM3  | MOL004624 | Longikaurin A                                           | GABRA2 |
| MOL000296 | hederagenin                                                                                                                                                      | CHRM1  | MOL004624 | Longikaurin A                                           | GABRA3 |
| MOL000296 | hederagenin                                                                                                                                                      | GABRA2 | MOL004624 | Longikaurin A                                           | CHRM2  |
| MOL000296 | hederagenin                                                                                                                                                      | GABRA3 | MOL004624 | Longikaurin A                                           | GABRA6 |
| MOL000296 | hederagenin                                                                                                                                                      | CHRM2  | MOL004653 | (+)-Anomalin                                            | KCNH2  |
| MOL000296 | hederagenin                                                                                                                                                      | ADRA1B | MOL004653 | (+)-Anomalin                                            | PTGS2  |
| MOL000296 | hederagenin                                                                                                                                                      | GABRA1 | MOL004653 | (+)-Anomalin                                            | DPP4   |
| MOL000296 | hederagenin                                                                                                                                                      | GRIA2  | MOL004718 | \u03b1-spinasterol                                      | PGR    |
| MOL000296 | hederagenin                                                                                                                                                      | GABRA6 | MOL004718 | \u03b1-spinasterol                                      | NR3C2  |
| MOL000296 | hederagenin                                                                                                                                                      | GABRA5 | MOL000490 | petunidin                                               | NOS2   |
| MOL000296 | hederagenin                                                                                                                                                      | ADH1B  | MOL000490 | petunidin                                               | PTGS1  |
| MOL000296 | hederagenin                                                                                                                                                      | ADH1C  | MOL000490 | petunidin                                               | PTGS2  |
| MOL000296 | hederagenin                                                                                                                                                      | PTGS1  | MOL000490 | petunidin                                               | ESR2   |
| MOL000296 | hederagenin                                                                                                                                                      | SCN5A  | MOL000490 | petunidin                                               | MAPK14 |
| MOL000296 | hederagenin                                                                                                                                                      | PTGS2  | MOL000490 | petunidin                                               | GSK3B  |
| MOL000296 | hederagenin                                                                                                                                                      | PDE3A  | MOL002135 | Myricanone                                              | NOS2   |
| MOL000296 | hederagenin                                                                                                                                                      | SLC6A2 | MOL002135 | Myricanone                                              | PTGS1  |
| MOL001510 | 24-epicampesterol                                                                                                                                                | PGR    | MOL002135 | Myricanone                                              | KCNH2  |
| MOL001645 | Linoleyl acetate                                                                                                                                                 | PTGS1  | MOL002135 | Myricanone                                              | ESR1   |
| MOL001645 | Linoleyl acetate                                                                                                                                                 | PTGS2  | MOL002135 | Myricanone                                              | AR     |
| MOL001771 | poriferast-5-en-3beta-ol                                                                                                                                         | PGR    | MOL002135 | Myricanone                                              | SCN5A  |
| MOL001792 | DFV                                                                                                                                                              | PTGS1  | MOL002135 | Myricanone                                              | PPARG  |
| MOL001792 | DFV                                                                                                                                                              | ESR1   | MOL002135 | Myricanone                                              | PTGS2  |
| MOL001792 | DFV                                                                                                                                                              | PTGS2  | MOL002135 | Myricanone                                              | F7     |
| MOL001792 | DFV                                                                                                                                                              | ADRB2  | MOL002135 | Myricanone                                              | PDE3A  |
| MOL001792 | DFV                                                                                                                                                              | MAOB   | MOL002135 | Myricanone                                              | ADRB2  |
| MOL001792 | DFV                                                                                                                                                              | SLC6A4 | MOL002135 | Myricanone                                              | ESR2   |
| MOL003044 | Chryseriol                                                                                                                                                       | NOS2   | MOL002135 | Myricanone                                              | DPP4   |
| MOL003044 | Chryseriol                                                                                                                                                       | PTGS1  | MOL002135 | Myricanone                                              | MAPK14 |
| MOL003044 | Chryseriol                                                                                                                                                       | ESR1   | MOL002135 | Myricanone                                              | GSK3B  |
| MOL003044 | Chryseriol                                                                                                                                                       | AR     | MOL002140 | Perlolyrine                                             | PTGS2  |
| MOL003044 | Chryseriol                                                                                                                                                       | PPARG  | MOL002157 | wallichilide                                            | PTGS2  |
| MOL003044 | Chryseriol                                                                                                                                                       | PTGS2  | MOL002157 | wallichilide                                            | NR3C2  |
| MOL003044 | Chryseriol                                                                                                                                                       | DPP4   | MOL002157 | wallichilide                                            | NR3C1  |
| MOL003044 | Chryseriol                                                                                                                                                       | MAPK14 | MOL000433 | FA                                                      | GSK3B  |
| MOL003044 | Chryseriol                                                                                                                                                       | GSK3B  | MOL004380 | C-Homoerythrinan, 1,6-didehydro-3,15,16-trimethoxy-,    | HTR1A  |
| MOL003542 | 8-Isopentenyl-kaempferol                                                                                                                                         | ESR1   | MOL005406 | atropine                                                | HTR1A  |
| MOL003542 | 8-Isopentenyl-kaempferol                                                                                                                                         | AR     | MOL009650 | Atropine                                                | HTR1A  |

|           |                                                      |        |           |                                                      |       |
|-----------|------------------------------------------------------|--------|-----------|------------------------------------------------------|-------|
| MOL003542 | 8-Isopentenyl-kaempferol                             | PPARG  | MOL004380 | C-Homoerythrinan, 1,6-didehydro-3,15,16-trimethoxy-, | HTR1B |
| MOL003542 | 8-Isopentenyl-kaempferol                             | PTGS2  | MOL005406 | atropine                                             | HTR1B |
| MOL003542 | 8-Isopentenyl-kaempferol                             | DPP4   | MOL009650 | Atropine                                             | HTR1B |
| MOL003542 | 8-Isopentenyl-kaempferol                             | GSK3B  | MOL000358 | beta-sitosterol                                      | HTR2A |
| MOL003542 | 8-Isopentenyl-kaempferol                             | PTGS1  | MOL000449 | Stigmasterol                                         | HTR2A |
| MOL003542 | 8-Isopentenyl-kaempferol                             | SCN5A  | MOL004380 | C-Homoerythrinan, 1,6-didehydro-3,15,16-trimethoxy-, | HTR2A |
| MOL003542 | 8-Isopentenyl-kaempferol                             | F7     | MOL002651 | Dehydrotanshinone II A                               | HTR2A |
| MOL003542 | 8-Isopentenyl-kaempferol                             | MAPK14 | MOL002670 | Cavidine                                             | HTR2A |
| MOL003542 | 8-Isopentenyl-kaempferol                             | KCNMA1 | MOL000787 | Fumarine                                             | HTR2A |
| MOL003542 | 8-Isopentenyl-kaempferol                             | GABRA2 | MOL000790 | Isocorypalmine                                       | HTR2A |
| MOL003542 | 8-Isopentenyl-kaempferol                             | GABRA1 | MOL001455 | (S)-Canadine                                         | HTR2A |
| MOL003542 | 8-Isopentenyl-kaempferol                             | PDE3A  | MOL005406 | atropine                                             | HTR2A |
| MOL003542 | 8-Isopentenyl-kaempferol                             | KCNH2  | MOL009650 | Atropine                                             | HTR2A |
| MOL003542 | 8-Isopentenyl-kaempferol                             | PYGM   | MOL004380 | C-Homoerythrinan, 1,6-didehydro-3,15,16-trimethoxy-, | HTR2C |
| MOL004367 | olivil                                               | PTGS2  | MOL002670 | Cavidine                                             | HTR2C |
| MOL004380 | C-Homoerythrinan, 1,6-didehydro-3,15,16-trimethoxy-, | PTGS1  | MOL000790 | Isocorypalmine                                       | HTR2C |
| MOL004380 | C-Homoerythrinan, 1,6-didehydro-3,15,16-trimethoxy-, | DRD1   | MOL001455 | (S)-Canadine                                         | HTR2C |
| MOL004380 | C-Homoerythrinan, 1,6-didehydro-3,15,16-trimethoxy-, | CHRM3  | MOL005406 | atropine                                             | HTR2C |
| MOL004380 | C-Homoerythrinan, 1,6-didehydro-3,15,16-trimethoxy-, | KCNH2  | MOL009650 | Atropine                                             | HTR2C |
| MOL004380 | C-Homoerythrinan, 1,6-didehydro-3,15,16-trimethoxy-, | CHRM1  | MOL000785 | palmatine                                            | PRKCA |
| MOL004380 | C-Homoerythrinan, 1,6-didehydro-3,15,16-trimethoxy-, | AR     | MOL000098 | quercetin                                            | PRKCA |
| MOL004380 | C-Homoerythrinan, 1,6-didehydro-3,15,16-trimethoxy-, | DRD5   | MOL000358 | beta-sitosterol                                      | PRKCA |
| MOL004380 | C-Homoerythrinan, 1,6-didehydro-3,15,16-trimethoxy-, | ADRB1  | MOL000422 | kaempferol                                           | PRKCA |
| MOL004380 | C-Homoerythrinan, 1,6-didehydro-3,15,16-trimethoxy-, | SCN5A  | MOL000492 | (+)-catechin                                         | PRKCA |
| MOL004380 | C-Homoerythrinan, 1,6-didehydro-3,15,16-trimethoxy-, | CHRM5  | MOL001944 | Marmesin                                             | PRKCA |
| MOL004380 | C-Homoerythrinan, 1,6-didehydro-3,15,16-trimethoxy-, | PTGS2  | MOL000449 | Stigmasterol                                         | PRKCA |
| MOL004380 | C-Homoerythrinan, 1,6-didehydro-3,15,16-trimethoxy-, | ADRA2A | MOL000631 | coumaroyltyramine                                    | PRKCA |
| MOL004380 | C-Homoerythrinan, 1,6-didehydro-3,15,16-trimethoxy-, | HTR3A  | MOL005384 | suchilactone                                         | PRKCA |
| MOL004380 | C-Homoerythrinan, 1,6-didehydro-3,15,16-trimethoxy-, | OPRD1  | MOL006147 | Alizarin-2-methylether                               | PRKCA |
| MOL004380 | C-Homoerythrinan, 1,6-didehydro-3,15,16-trimethoxy-, | PDE3A  | MOL009504 | 1-hydroxy-6-hydroxymethylanthracenequinone           | PRKCA |
| MOL004380 | C-Homoerythrinan, 1,6-didehydro-3,15,16-trimethoxy-, | HRH1   | MOL009537 | americanin A                                         | PRKCA |
| MOL004380 | C-Homoerythrinan, 1,6-didehydro-3,15,16-trimethoxy-, | SLC6A2 | MOL001792 | DFV                                                  | PRKCA |
| MOL004380 | C-Homoerythrinan, 1,6-didehydro-3,15,16-trimethoxy-, | ADRA1A | MOL003044 | Chryseriol                                           | PRKCA |
| MOL004380 | C-Homoerythrinan, 1,6-didehydro-3,15,16-trimethoxy-, | GABRA3 | MOL004386 | Yinyanghuo E                                         | PRKCA |
| MOL004380 | C-Homoerythrinan, 1,6-didehydro-3,15,16-trimethoxy-, | CHRM2  | MOL000006 | luteolin                                             | PRKCA |
| MOL004380 | C-Homoerythrinan, 1,6-didehydro-3,15,16-trimethoxy-, | ADRA2B | MOL001454 | berberine                                            | PRKCA |
| MOL004380 | C-Homoerythrinan, 1,6-didehydro-3,15,16-trimethoxy-, | ADRA1B | MOL002662 | rutaecarpine                                         | PRKCA |
| MOL004380 | C-Homoerythrinan, 1,6-didehydro-3,15,16-trimethoxy-, | SLC6A3 | MOL002663 | Skimmianin                                           | PRKCA |
| MOL004380 | C-Homoerythrinan, 1,6-didehydro-3,15,16-trimethoxy-, | ADRB2  | MOL002666 | Chelerythrine                                        | PRKCA |
| MOL004380 | C-Homoerythrinan, 1,6-didehydro-3,15,16-trimethoxy-, | ADRA1D | MOL000787 | Fumarine                                             | PRKCA |
| MOL004380 | C-Homoerythrinan, 1,6-didehydro-3,15,16-trimethoxy-, | CHRNA2 | MOL000790 | Isocorypalmine                                       | PRKCA |

|           |                                                                                                            |        |           |                                                              |        |
|-----------|------------------------------------------------------------------------------------------------------------|--------|-----------|--------------------------------------------------------------|--------|
| MOL004380 | C-Homoerythrinan, 1,6-didehydro-3,15,16-trimethoxy-,                                                       | SLC6A4 | MOL001455 | (S)-Canadine                                                 | PRKCA  |
| MOL004380 | C-Homoerythrinan, 1,6-didehydro-3,15,16-trimethoxy-,                                                       | DRD2   | MOL002894 | berberrubine                                                 | PRKCA  |
| MOL004380 | C-Homoerythrinan, 1,6-didehydro-3,15,16-trimethoxy-,                                                       | OPRM1  | MOL006422 | thalifendine                                                 | PRKCA  |
| MOL004380 | C-Homoerythrinan, 1,6-didehydro-3,15,16-trimethoxy-,                                                       | GABRA1 | MOL008400 | glycitein                                                    | PRKCA  |
| MOL004380 | C-Homoerythrinan, 1,6-didehydro-3,15,16-trimethoxy-,                                                       | GABRG3 | MOL000354 | isorhamnetin                                                 | PRKCA  |
| MOL004380 | C-Homoerythrinan, 1,6-didehydro-3,15,16-trimethoxy-,                                                       | GABRE  | MOL002140 | Perlolyrine                                                  | PRKCA  |
| MOL004382 | Yinyanghuo A                                                                                               | ESR1   | MOL001944 | Marmesin                                                     | PTPN1  |
| MOL004382 | Yinyanghuo A                                                                                               | AR     | MOL005384 | suchilactone                                                 | PTPN1  |
| MOL004382 | Yinyanghuo A                                                                                               | PTGS2  | MOL002644 | Phellopterin                                                 | PTPN1  |
| MOL004384 | Yinyanghuo C                                                                                               | NOS2   | MOL000354 | isorhamnetin                                                 | PTPN1  |
| MOL004384 | Yinyanghuo C                                                                                               | AR     | MOL002776 | Baicalin                                                     | PTPN1  |
| MOL004384 | Yinyanghuo C                                                                                               | PTGS2  | MOL004609 | Areapillin                                                   | PTPN1  |
| MOL004384 | Yinyanghuo C                                                                                               | ACHE   | MOL000358 | beta-sitosterol                                              | CHRNA7 |
| MOL004384 | Yinyanghuo C                                                                                               | ESR2   | MOL004497 | Hippeastrine                                                 | CHRNA7 |
| MOL004384 | Yinyanghuo C                                                                                               | DPP4   | MOL000449 | Stigmasterol                                                 | CHRNA7 |
| MOL004386 | Yinyanghuo E                                                                                               | NOS2   | MOL006147 | Alizarin-2-methylether                                       | CHRNA7 |
| MOL004386 | Yinyanghuo E                                                                                               | AR     | MOL009504 | 1-hydroxy-6-hydroxymethylanthracenequinone                   | CHRNA7 |
| MOL004386 | Yinyanghuo E                                                                                               | PTGS2  | MOL004380 | C-Homoerythrinan, 1,6-didehydro-3,15,16-trimethoxy-,         | CHRNA7 |
| MOL004386 | Yinyanghuo E                                                                                               | ACHE   | MOL002644 | Phellopterin                                                 | CHRNA7 |
| MOL004386 | Yinyanghuo E                                                                                               | DPP4   | MOL002651 | Dehydrotanshinone II A                                       | CHRNA7 |
| MOL004388 | 6-hydroxy-11,12-dimethoxy-2,2-dimethyl-1,8-dioxo-2,3,4,8-tetrahydro-1H-isochromeno[3,4-h]isoquinolin-2-ium | PTGS1  | MOL002331 | N-Methylflindersine                                          | CHRNA7 |
| MOL004388 | 6-hydroxy-11,12-dimethoxy-2,2-dimethyl-1,8-dioxo-2,3,4,8-tetrahydro-1H-isochromeno[3,4-h]isoquinolin-2-ium | PTGS2  | MOL000098 | quercetin                                                    | PIK3CG |
| MOL004388 | 6-hydroxy-11,12-dimethoxy-2,2-dimethyl-1,8-dioxo-2,3,4,8-tetrahydro-1H-isochromeno[3,4-h]isoquinolin-2-ium | KCNMA1 | MOL000358 | beta-sitosterol                                              | PIK3CG |
| MOL004391 | 8-(3-methylbut-2-enyl)-2-phenyl-chromone                                                                   | NOS2   | MOL000422 | kaempferol                                                   | PIK3CG |
| MOL004391 | 8-(3-methylbut-2-enyl)-2-phenyl-chromone                                                                   | PTGS1  | MOL001944 | Marmesin                                                     | PIK3CG |
| MOL004391 | 8-(3-methylbut-2-enyl)-2-phenyl-chromone                                                                   | CHRM3  | MOL004497 | Hippeastrine                                                 | PIK3CG |
| MOL004391 | 8-(3-methylbut-2-enyl)-2-phenyl-chromone                                                                   | CHRM1  | MOL006147 | Alizarin-2-methylether                                       | PIK3CG |
| MOL004391 | 8-(3-methylbut-2-enyl)-2-phenyl-chromone                                                                   | ESR1   | MOL009495 | 2-hydroxy-1,5-dimethoxy-6-(methoxymethyl)-9,10-anthraquinone | PIK3CG |
| MOL004391 | 8-(3-methylbut-2-enyl)-2-phenyl-chromone                                                                   | AR     | MOL009500 | 1,6-dihydroxy-5-methoxy-2-(methoxymethyl)-9,10-anthraquinone | PIK3CG |
| MOL004391 | 8-(3-methylbut-2-enyl)-2-phenyl-chromone                                                                   | ADRB1  | MOL009504 | 1-hydroxy-6-hydroxymethylanthracenequinone                   | PIK3CG |
| MOL004391 | 8-(3-methylbut-2-enyl)-2-phenyl-chromone                                                                   | SCN5A  | MOL009513 | 2-hydroxy-1,8-dimethoxy-7-methoxymethylanthracenequinon      | PIK3CG |
| MOL004391 | 8-(3-methylbut-2-enyl)-2-phenyl-chromone                                                                   | PPARG  | MOL009519 | (2R,3S)-(+)-3',5-Dihydroxy-4',7-dimethoxydihydroflavonol     | PIK3CG |
| MOL004391 | 8-(3-methylbut-2-enyl)-2-phenyl-chromone                                                                   | PTGS2  | MOL001792 | DFV                                                          | PIK3CG |
| MOL004391 | 8-(3-methylbut-2-enyl)-2-phenyl-chromone                                                                   | NOS3   | MOL003044 | Chryseriol                                                   | PIK3CG |
| MOL004391 | 8-(3-methylbut-2-enyl)-2-phenyl-chromone                                                                   | ACHE   | MOL000006 | luteolin                                                     | PIK3CG |
| MOL004391 | 8-(3-methylbut-2-enyl)-2-phenyl-chromone                                                                   | PDE3A  | MOL002662 | rutaecarpine                                                 | PIK3CG |
| MOL004391 | 8-(3-methylbut-2-enyl)-2-phenyl-chromone                                                                   | ADRA1B | MOL002663 | Skimmianin                                                   | PIK3CG |

|           |                                                   |        |           |                                                         |        |
|-----------|---------------------------------------------------|--------|-----------|---------------------------------------------------------|--------|
| MOL004391 | 8-(3-methylbut-2-enyl)-2-phenyl-chromone          | SLC6A3 | MOL000354 | isorhamnetin                                            | PIK3CG |
| MOL004391 | 8-(3-methylbut-2-enyl)-2-phenyl-chromone          | ADRB2  | MOL000098 | quercetin                                               | HTR2A  |
| MOL004391 | 8-(3-methylbut-2-enyl)-2-phenyl-chromone          | ADRA1D | MOL000422 | kaempferol                                              | HTR2A  |
| MOL004391 | 8-(3-methylbut-2-enyl)-2-phenyl-chromone          | SLC6A4 | MOL001677 | asperglaucide                                           | HTR2A  |
| MOL004391 | 8-(3-methylbut-2-enyl)-2-phenyl-chromone          | ESR2   | MOL001944 | Marmesin                                                | HTR2A  |
| MOL004391 | 8-(3-methylbut-2-enyl)-2-phenyl-chromone          | GABRA1 | MOL004373 | Anhydroicaritin                                         | HTR2A  |
| MOL004391 | 8-(3-methylbut-2-enyl)-2-phenyl-chromone          | DPP4   | MOL003542 | 8-Isopentenyl-kaempferol                                | HTR2A  |
| MOL004391 | 8-(3-methylbut-2-enyl)-2-phenyl-chromone          | MAPK14 | MOL004391 | 8-(3-methylbut-2-enyl)-2-phenyl-chromone                | HTR2A  |
| MOL004391 | 8-(3-methylbut-2-enyl)-2-phenyl-chromone          | GSK3B  | MOL002644 | Phellopterin                                            | HTR2A  |
| MOL004396 | 1,2-bis(4-hydroxy-3-methoxyphenyl)propan-1,3-diol | ESR1   | MOL002672 | Hericenone H                                            | HTR2A  |
| MOL004396 | 1,2-bis(4-hydroxy-3-methoxyphenyl)propan-1,3-diol | SCN5A  | MOL000354 | isorhamnetin                                            | HTR2A  |
| MOL004396 | 1,2-bis(4-hydroxy-3-methoxyphenyl)propan-1,3-diol | PTGS2  | MOL004598 | 3,5,6,7-tetramethoxy-2-(3,4,5-trimethoxyphenyl)chromone | HTR2A  |
| MOL004396 | 1,2-bis(4-hydroxy-3-methoxyphenyl)propan-1,3-diol | ADRA1B | MOL004609 | Areapillin                                              | HTR2A  |
| MOL004396 | 1,2-bis(4-hydroxy-3-methoxyphenyl)propan-1,3-diol | ADRB2  | MOL004653 | (+)-Anomalin                                            | HTR2A  |
| MOL004427 | Icariside A7                                      | PTGS2  | MOL002135 | Myricanone                                              | HTR2A  |
| MOL000006 | luteolin                                          | PTGS1  | MOL002140 | Perlolryne                                              | HTR2A  |
| MOL000006 | luteolin                                          | AR     | MOL000433 | FA                                                      | HTR2A  |
| MOL000006 | luteolin                                          | PTGS2  | MOL000098 | quercetin                                               | XDH    |
| MOL000006 | luteolin                                          | DPP4   | MOL000422 | kaempferol                                              | XDH    |
| MOL000354 | isorhamnetin                                      | XDH    | MOL000006 | luteolin                                                | XDH    |
